# Supplementary material for: Construction of cyclopenta[b]dihydronaphthofurans via TsOH-catalyzed consecutive biscyclization of dithioallylic alcohols and 1-styrylnaphthols
Source: Royal Society of Chemistry journal article supplement (doi:10.1039/d2cc06324g), 2023-01-01

# Spectrum Plot Report

|                |                |              |             |            |                 |                   |                                  |
|----------------|----------------|--------------|-------------|------------|-----------------|-------------------|----------------------------------|
| Name           | LHP-220909-3   | Rack Pos.    |             | Instrument | Instrument 1    | Operator          |                                  |
| Inj. Vol. (ul) | 8              | Plate Pos.   |             | IRM Status | All ions missed |                   |                                  |
| Data File      | LHP-220909-3.d | Method (Acq) | CJH220516.m | Comment    |                 | Acq. Time (Local) | 9/9/2022 10:40:42 AM (UTC+08:00) |

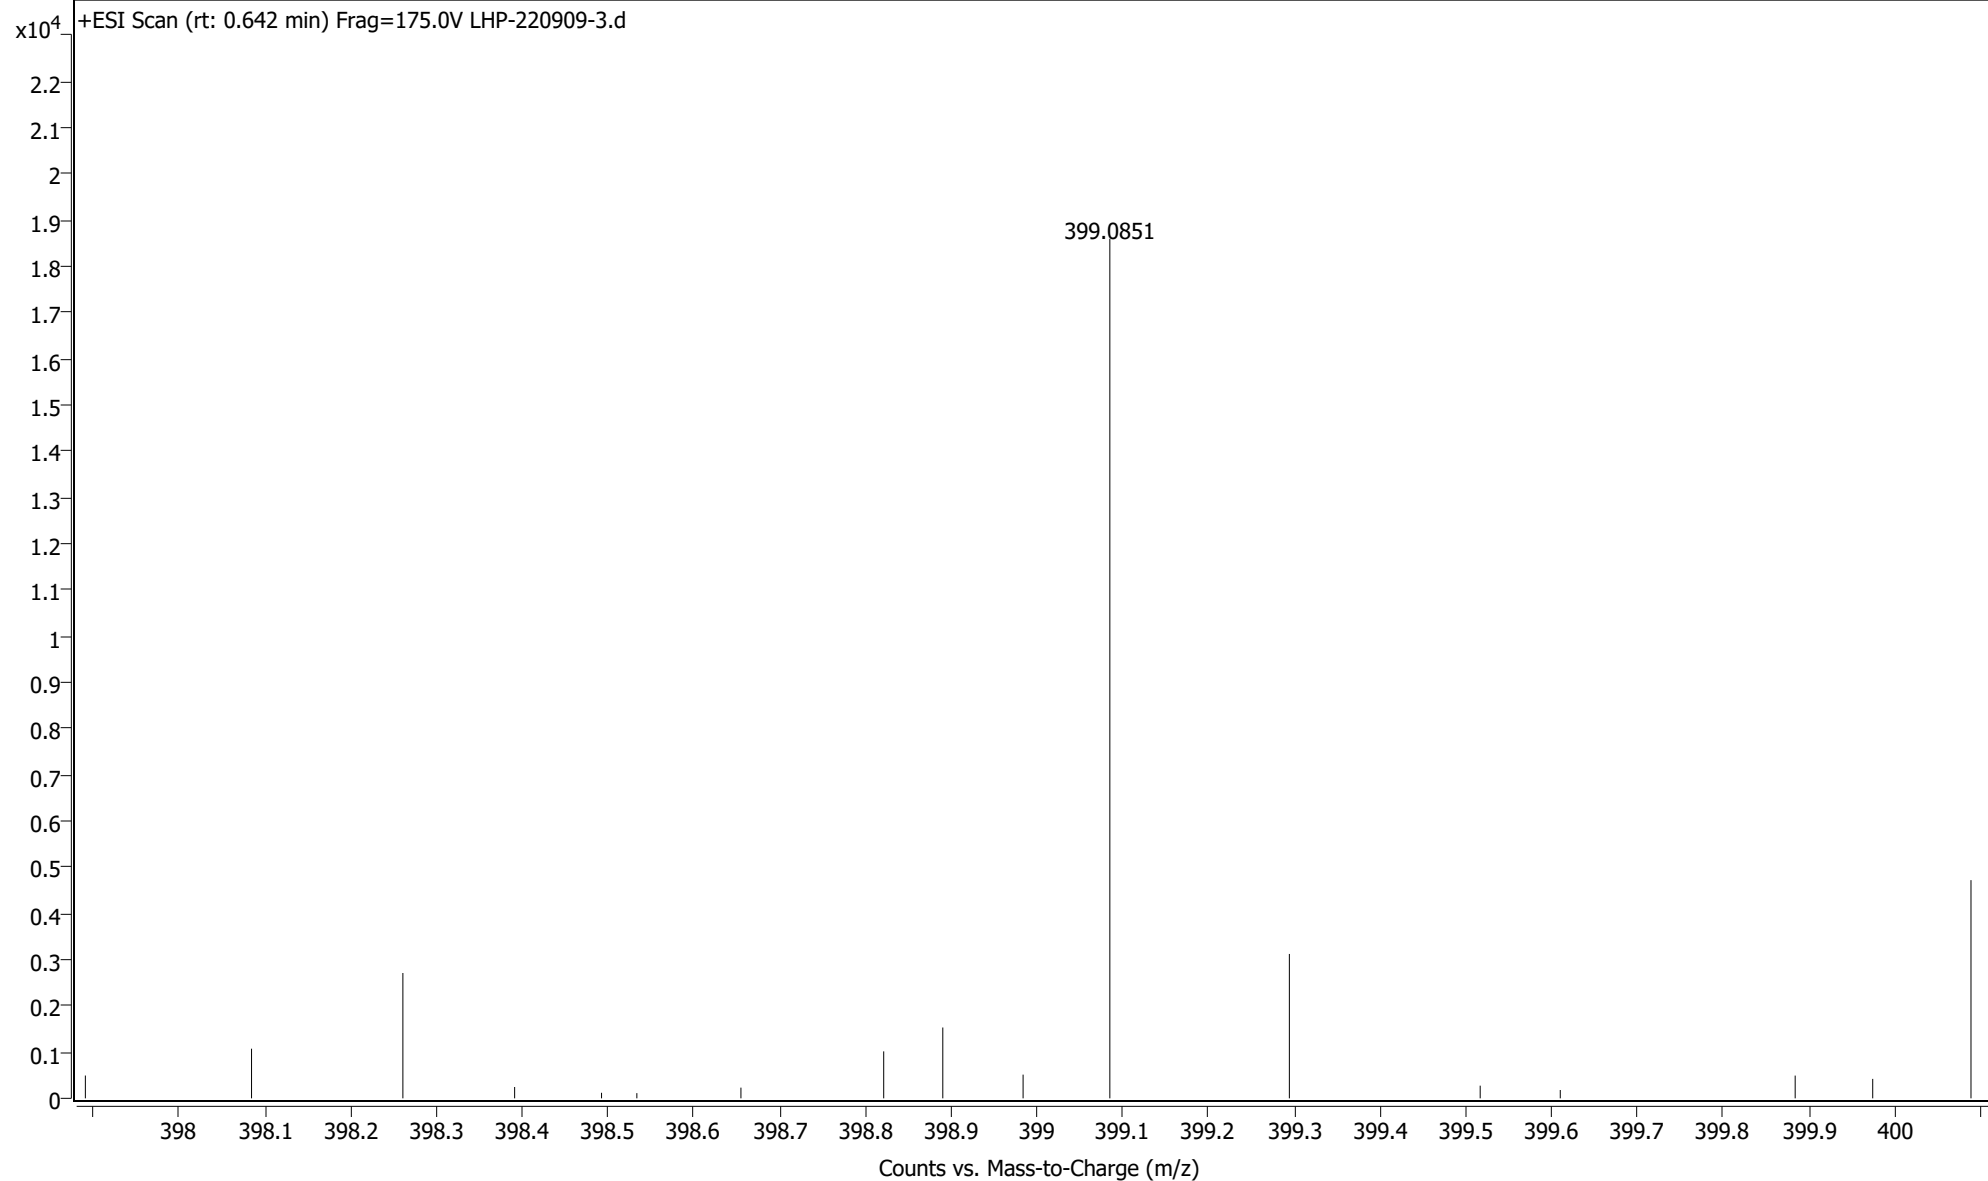

Supplement: d2cc06324g2.zip [file d2cc06324g2.zip]
