# Supplementary figures and images for: Construction of cyclopenta[b]dihydronaphthofurans via TsOH-catalyzed consecutive biscyclization of dithioallylic alcohols and 1-styrylnaphthols
Source: Royal Society of Chemistry journal article supplement (doi:10.1039/d2cc06324g), 2023-01-01

# Spectrum Plot Report

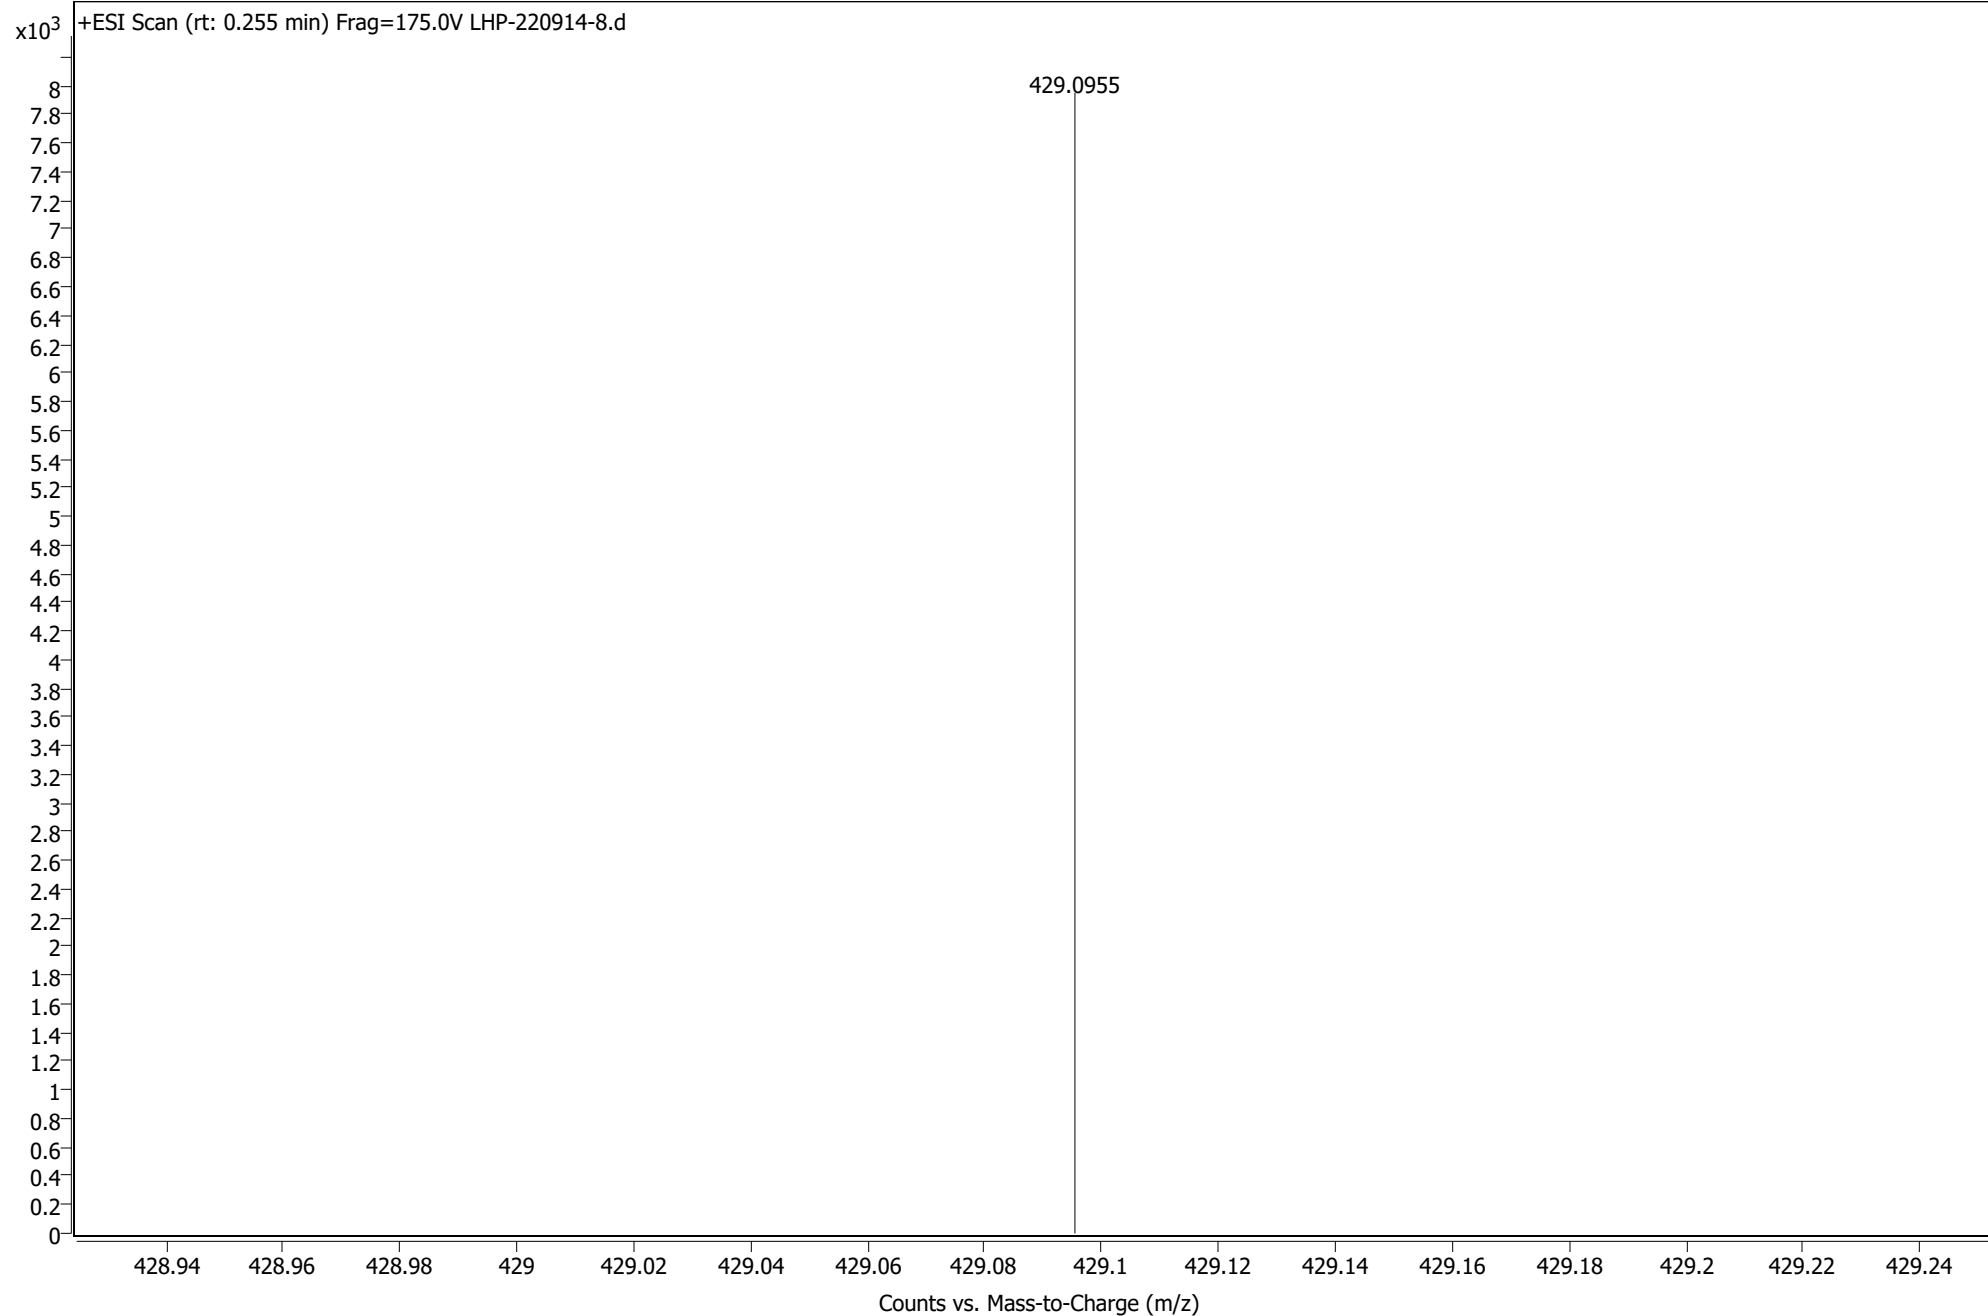

Supplement: d2cc06324g2.zip [file d2cc06324g2.zip]

# Spectrum Plot Report

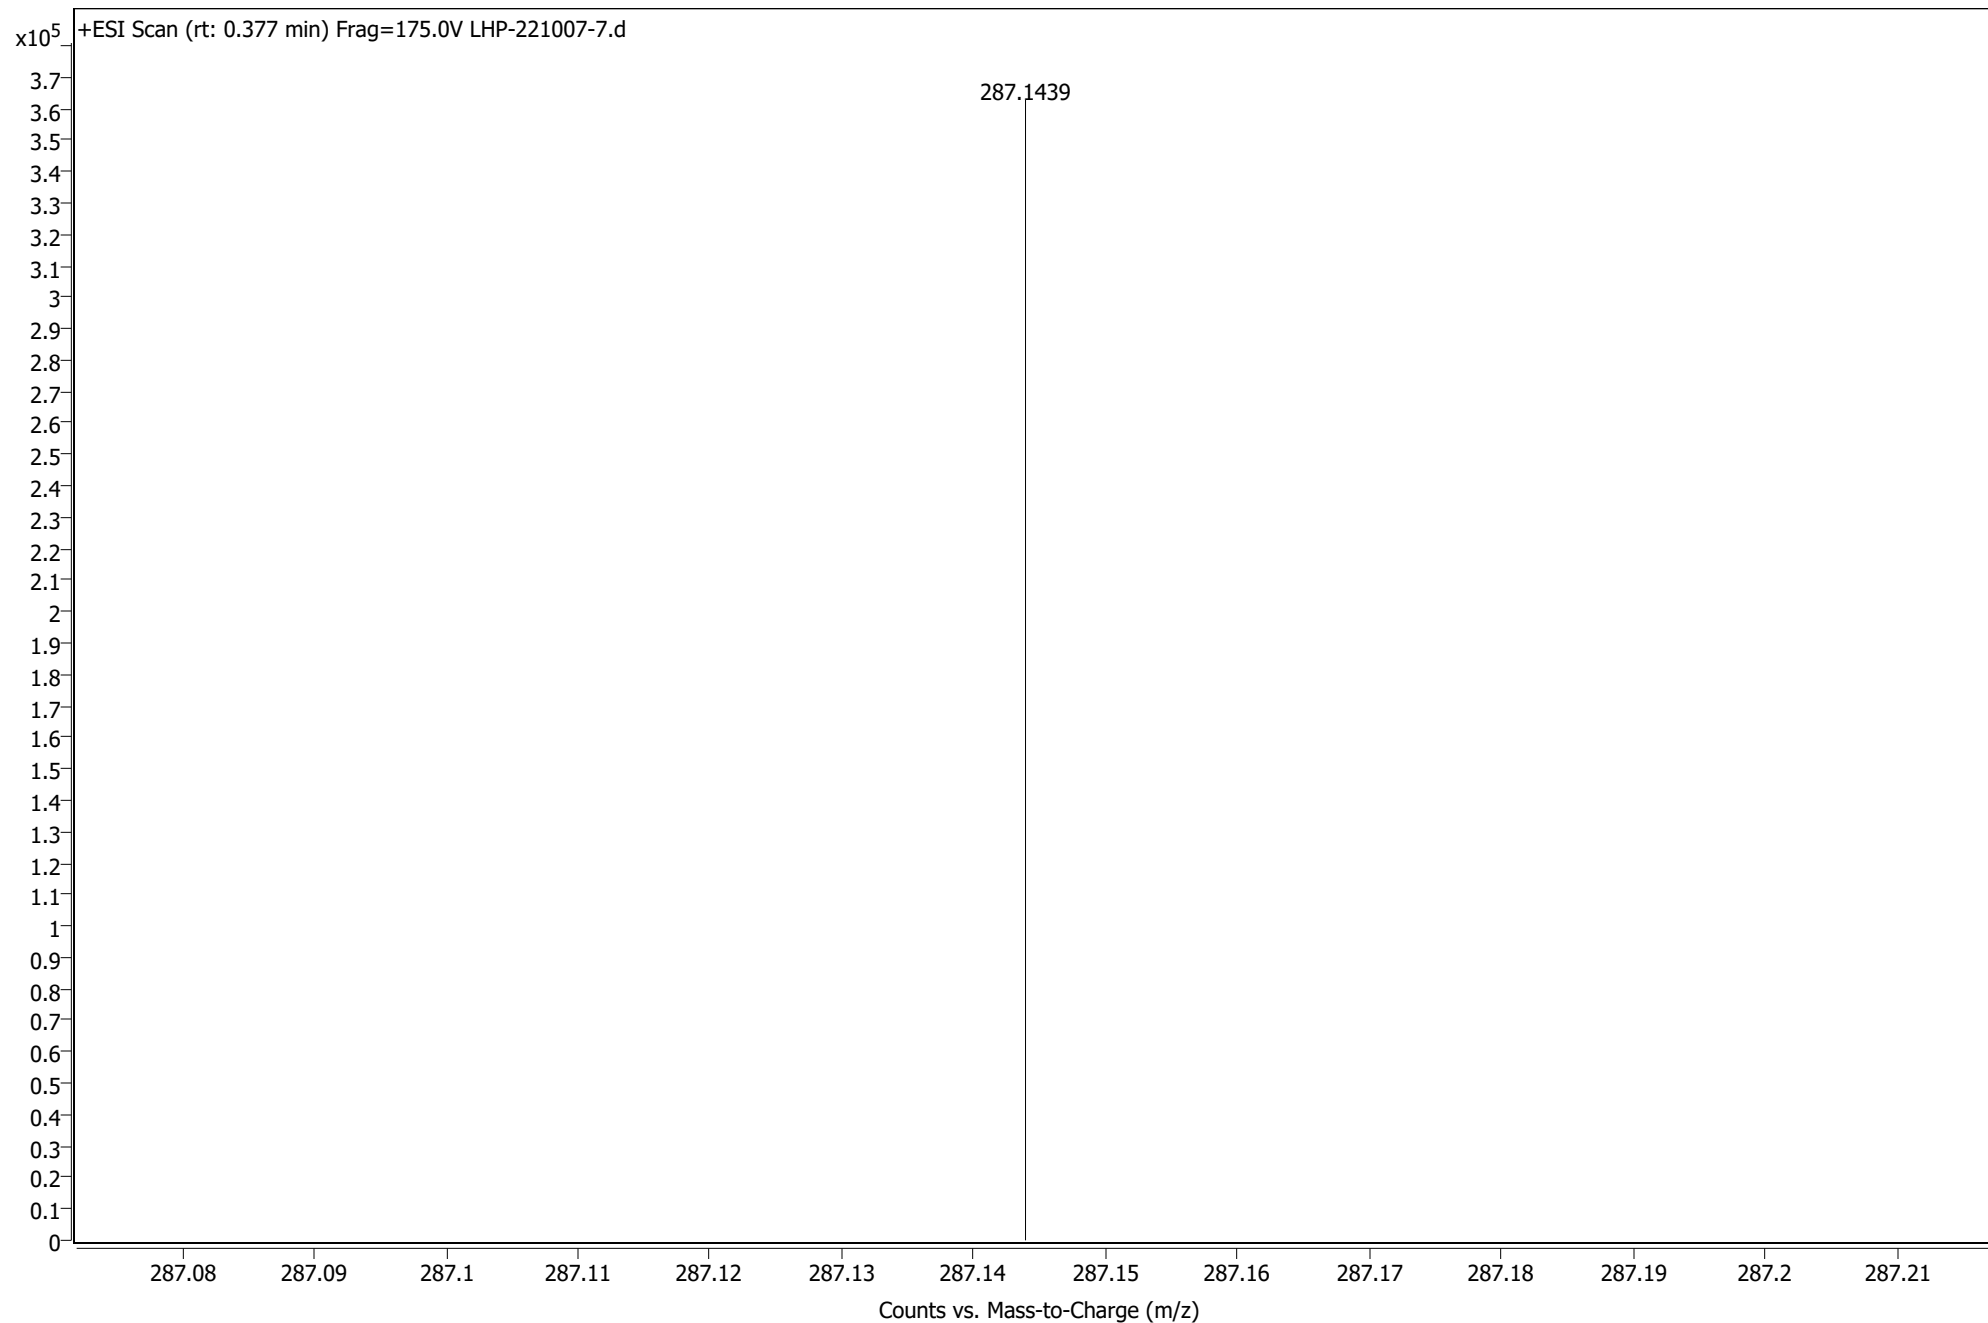

Supplement: d2cc06324g2.zip [file d2cc06324g2.zip]

# Spectrum Plot Report

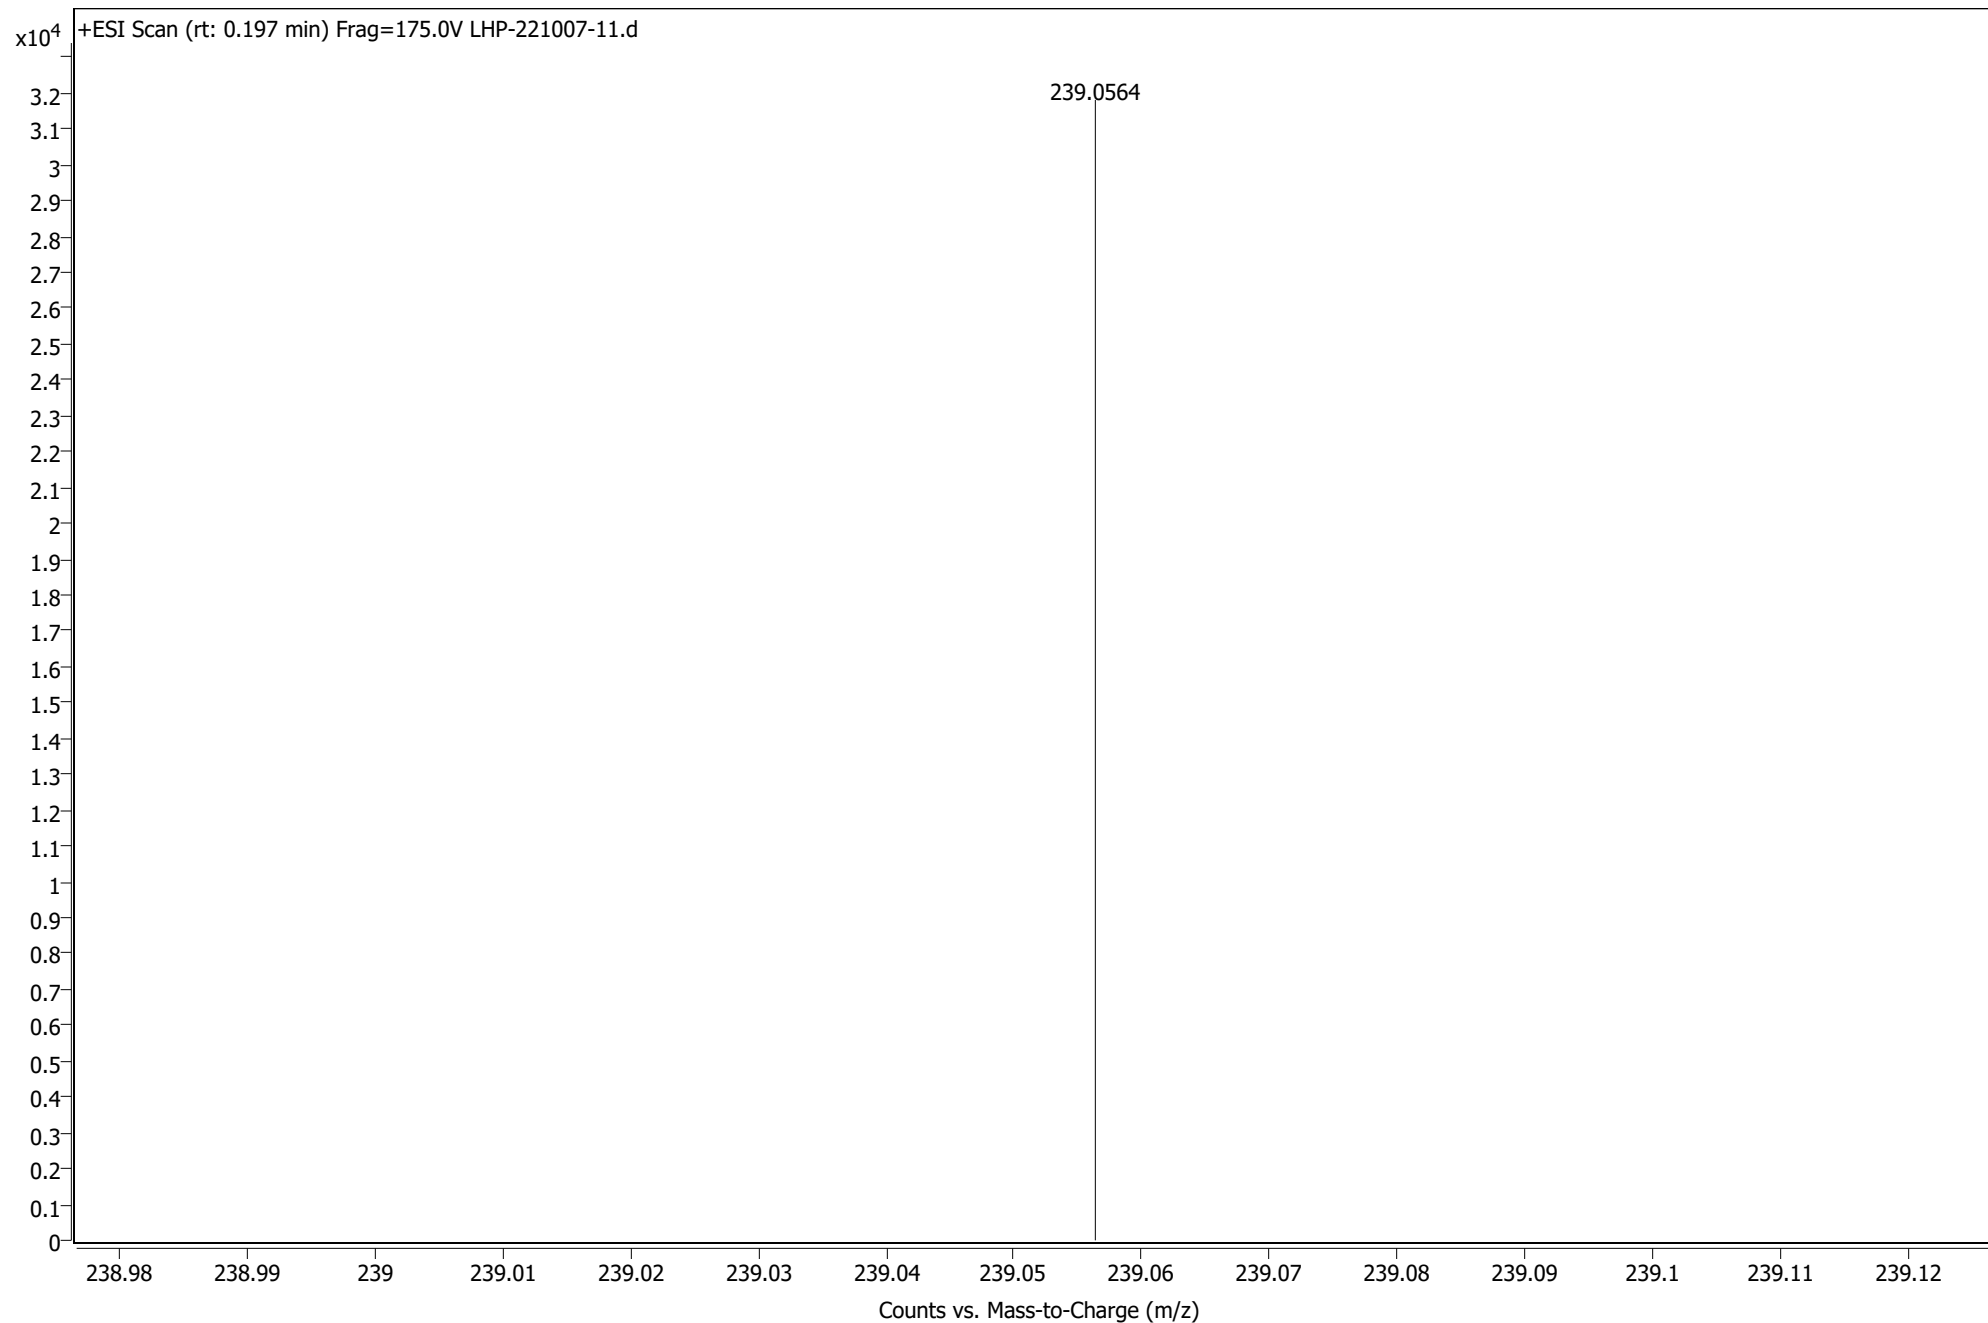

Supplement: d2cc06324g2.zip [file d2cc06324g2.zip]

# Spectrum Plot Report

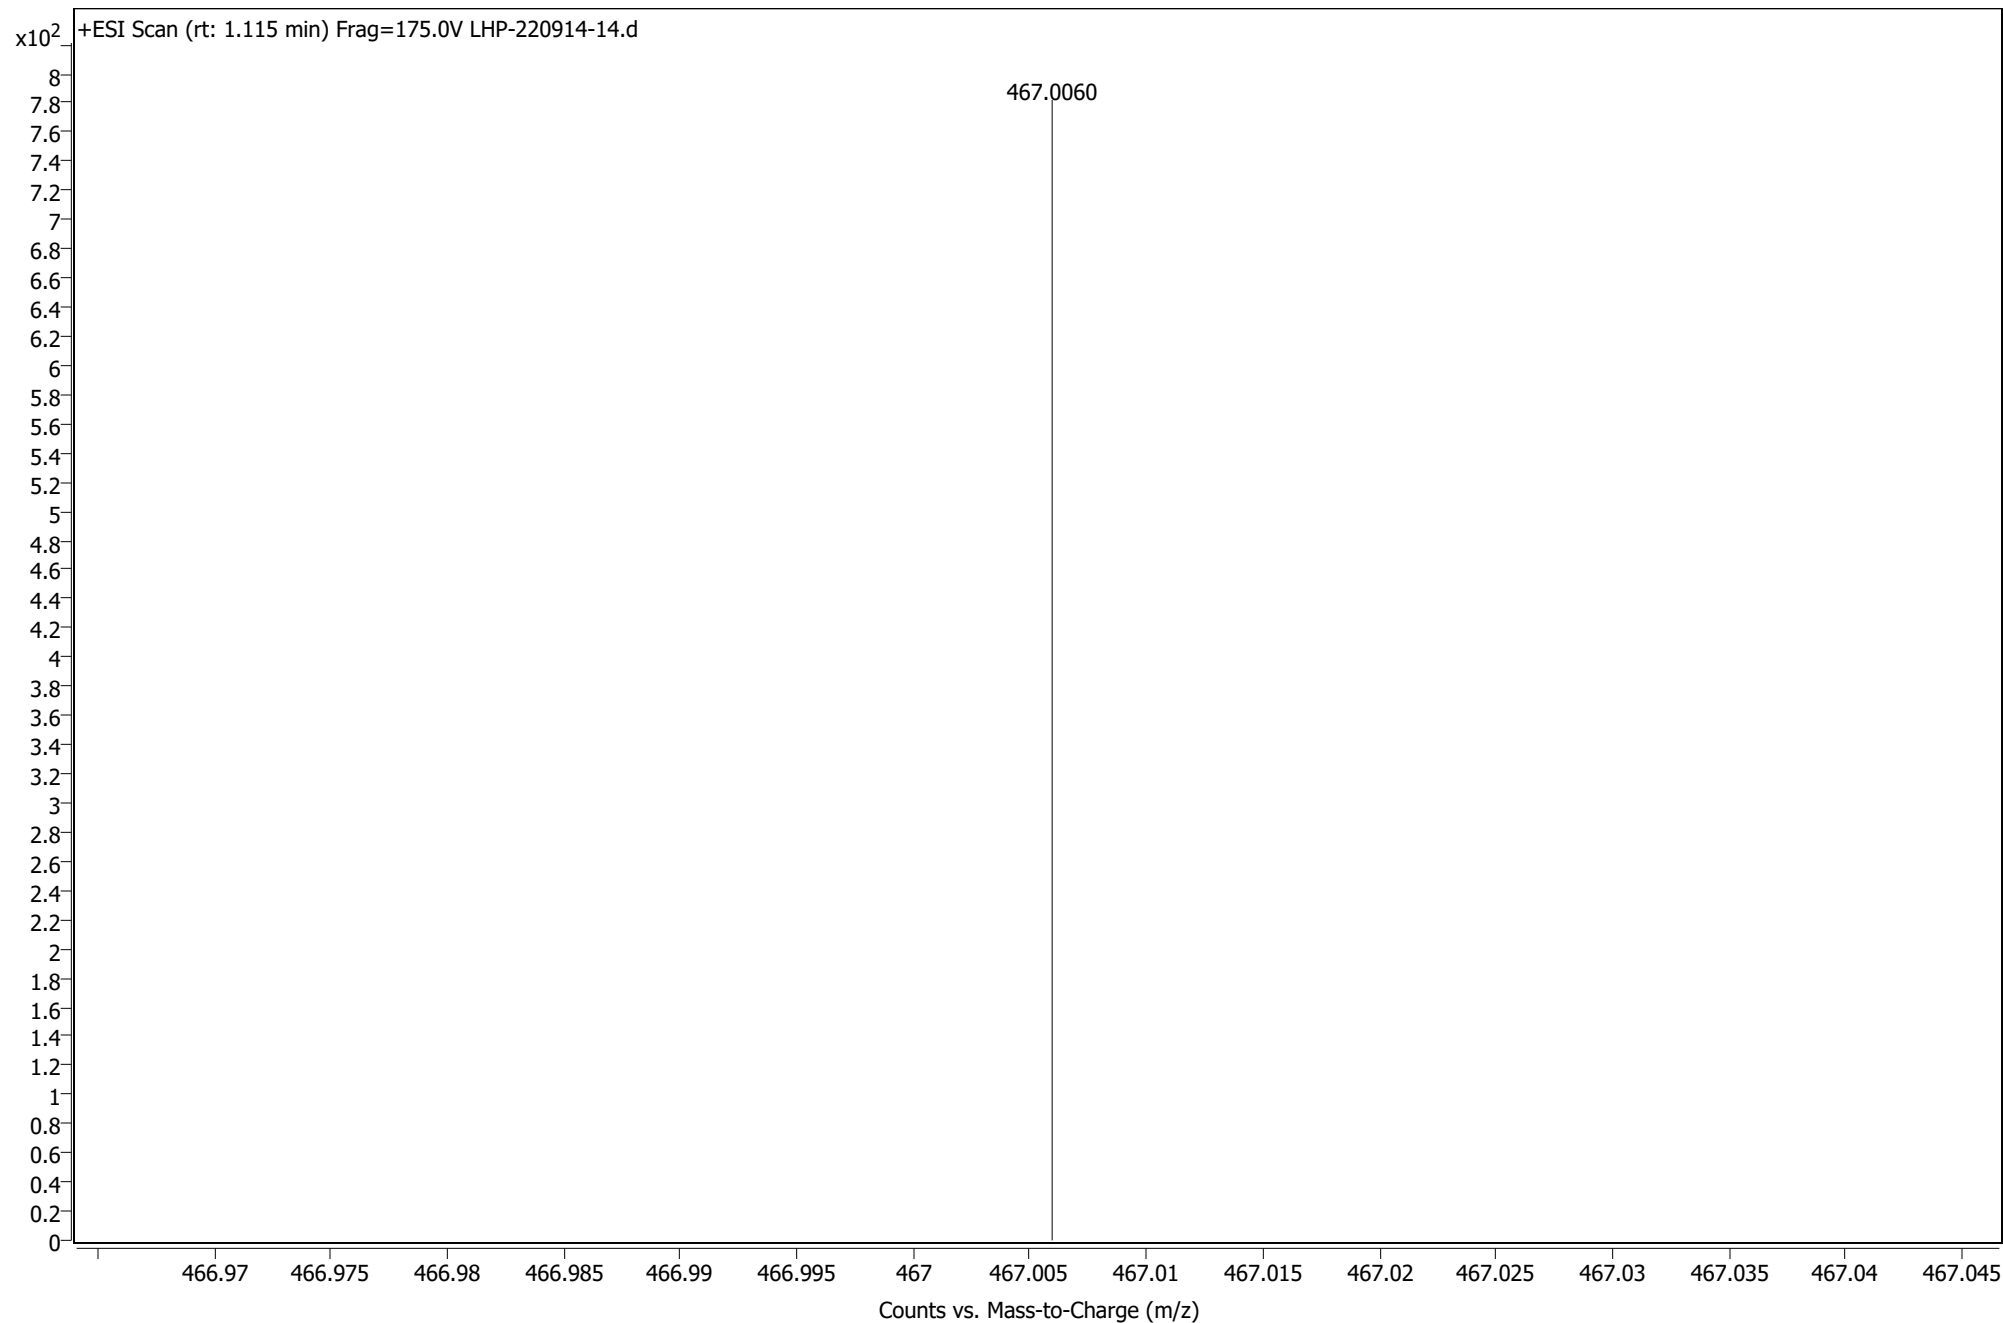

Supplement: d2cc06324g2.zip [file d2cc06324g2.zip]

# Spectrum Plot Report

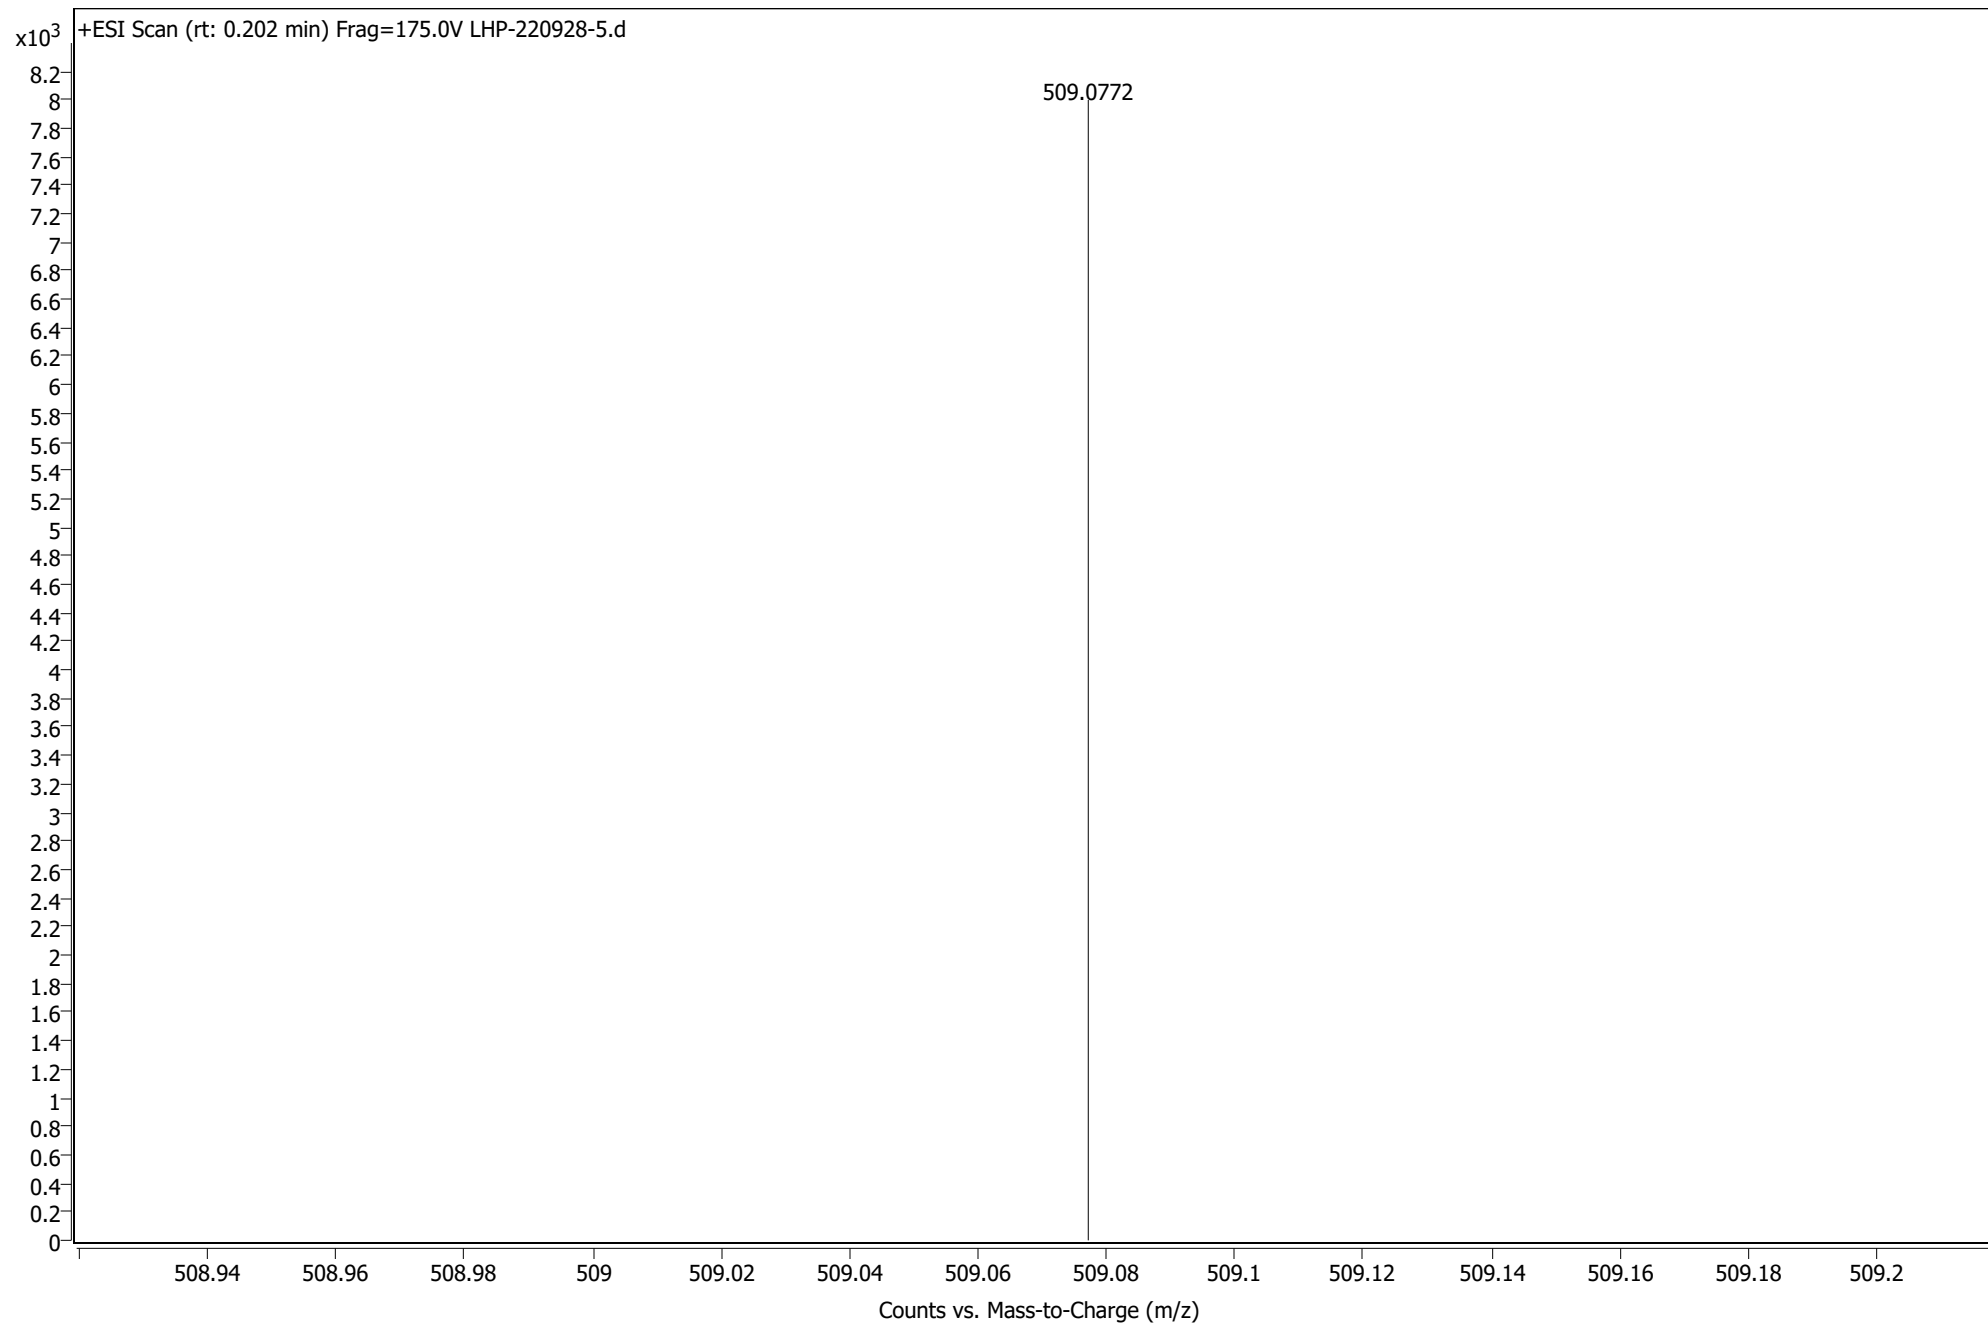

Supplement: d2cc06324g2.zip [file d2cc06324g2.zip]

# Spectrum Plot Report

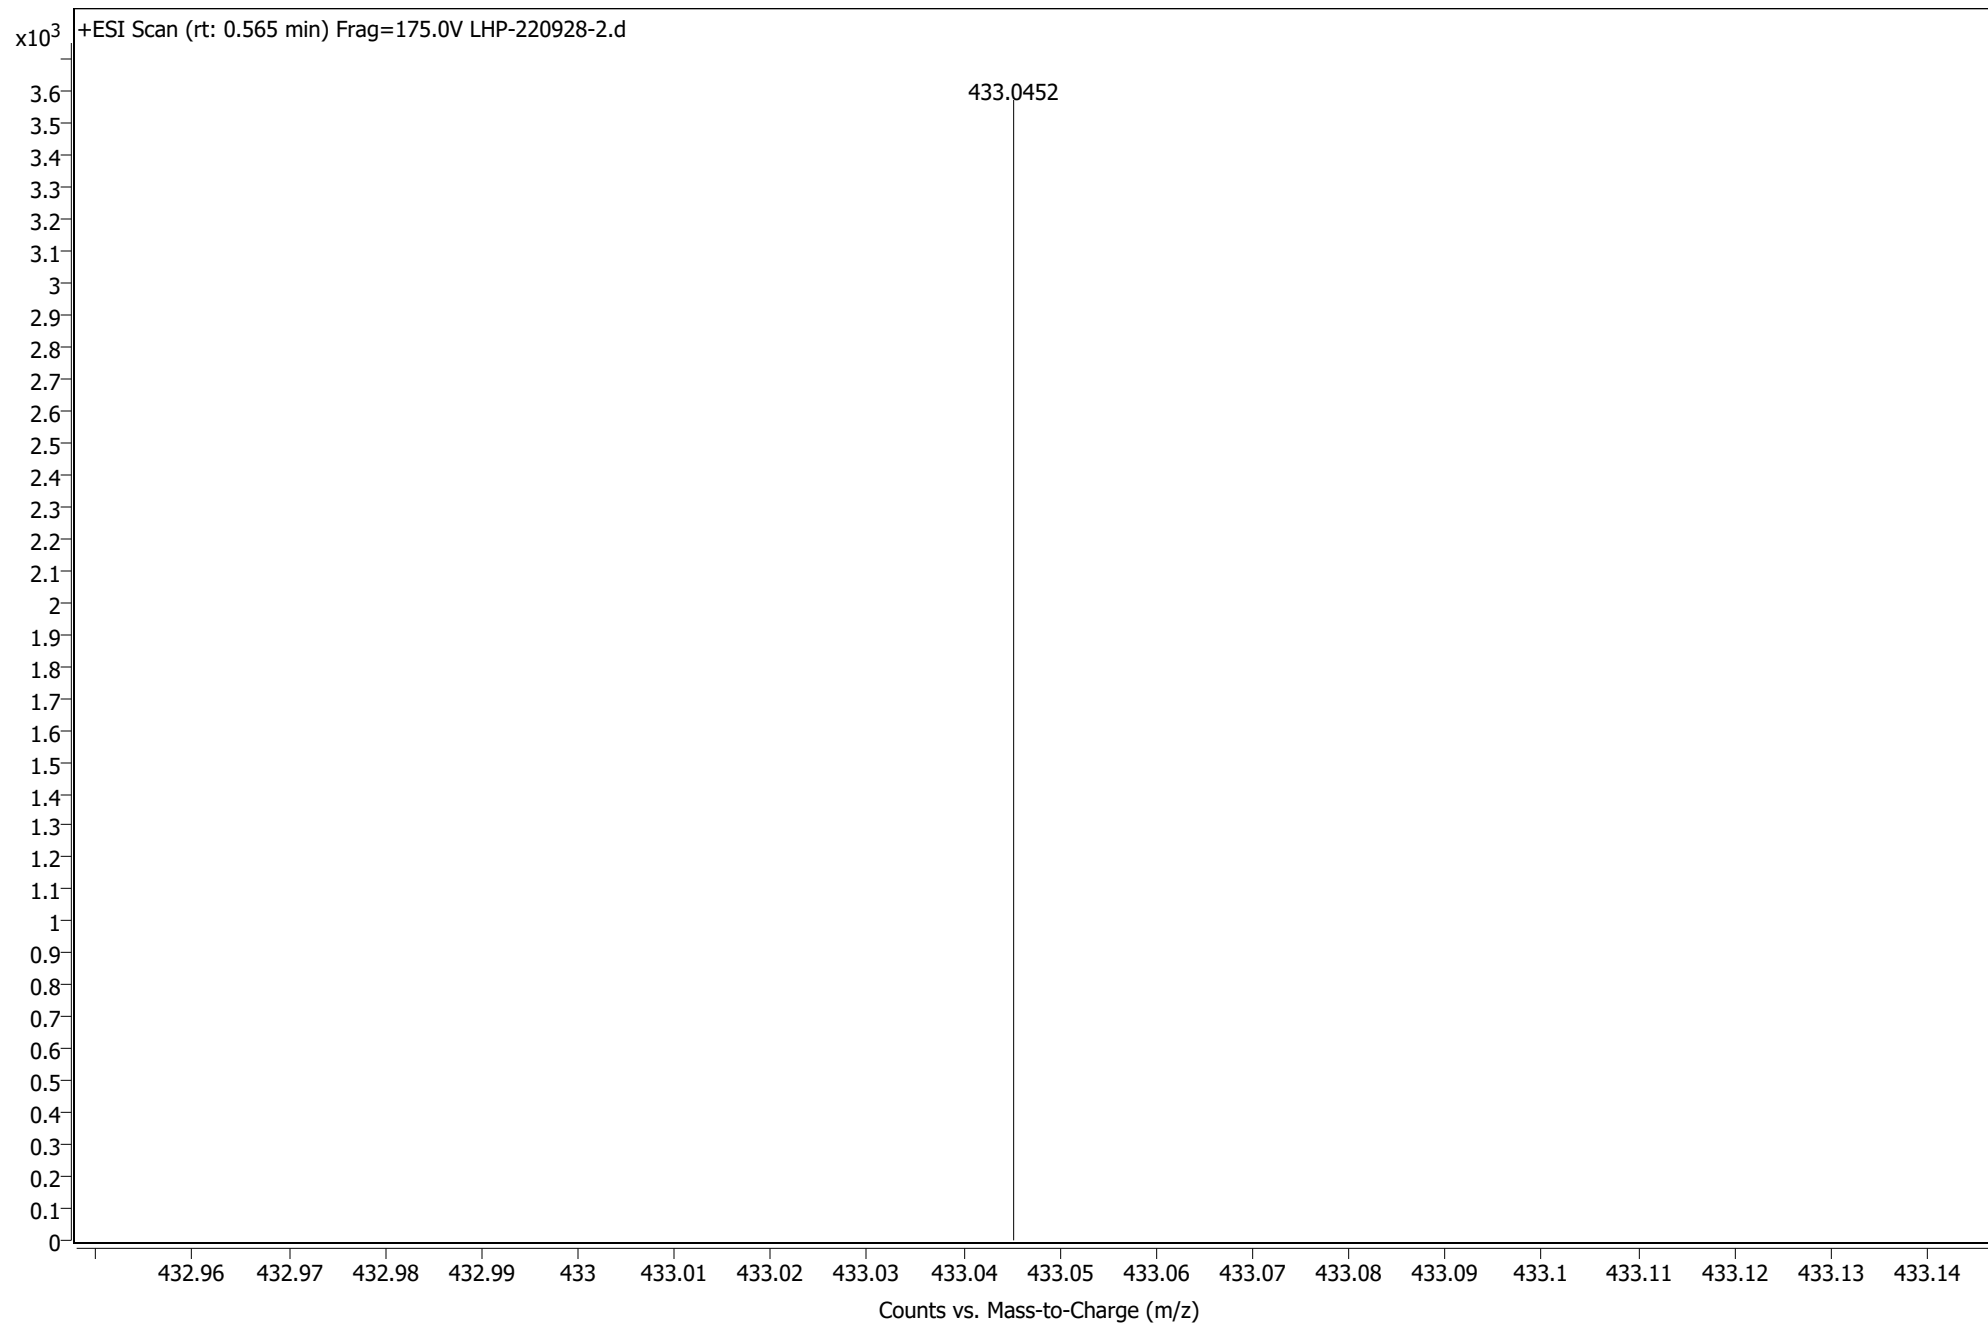

Supplement: d2cc06324g2.zip [file d2cc06324g2.zip]

# Spectrum Plot Report

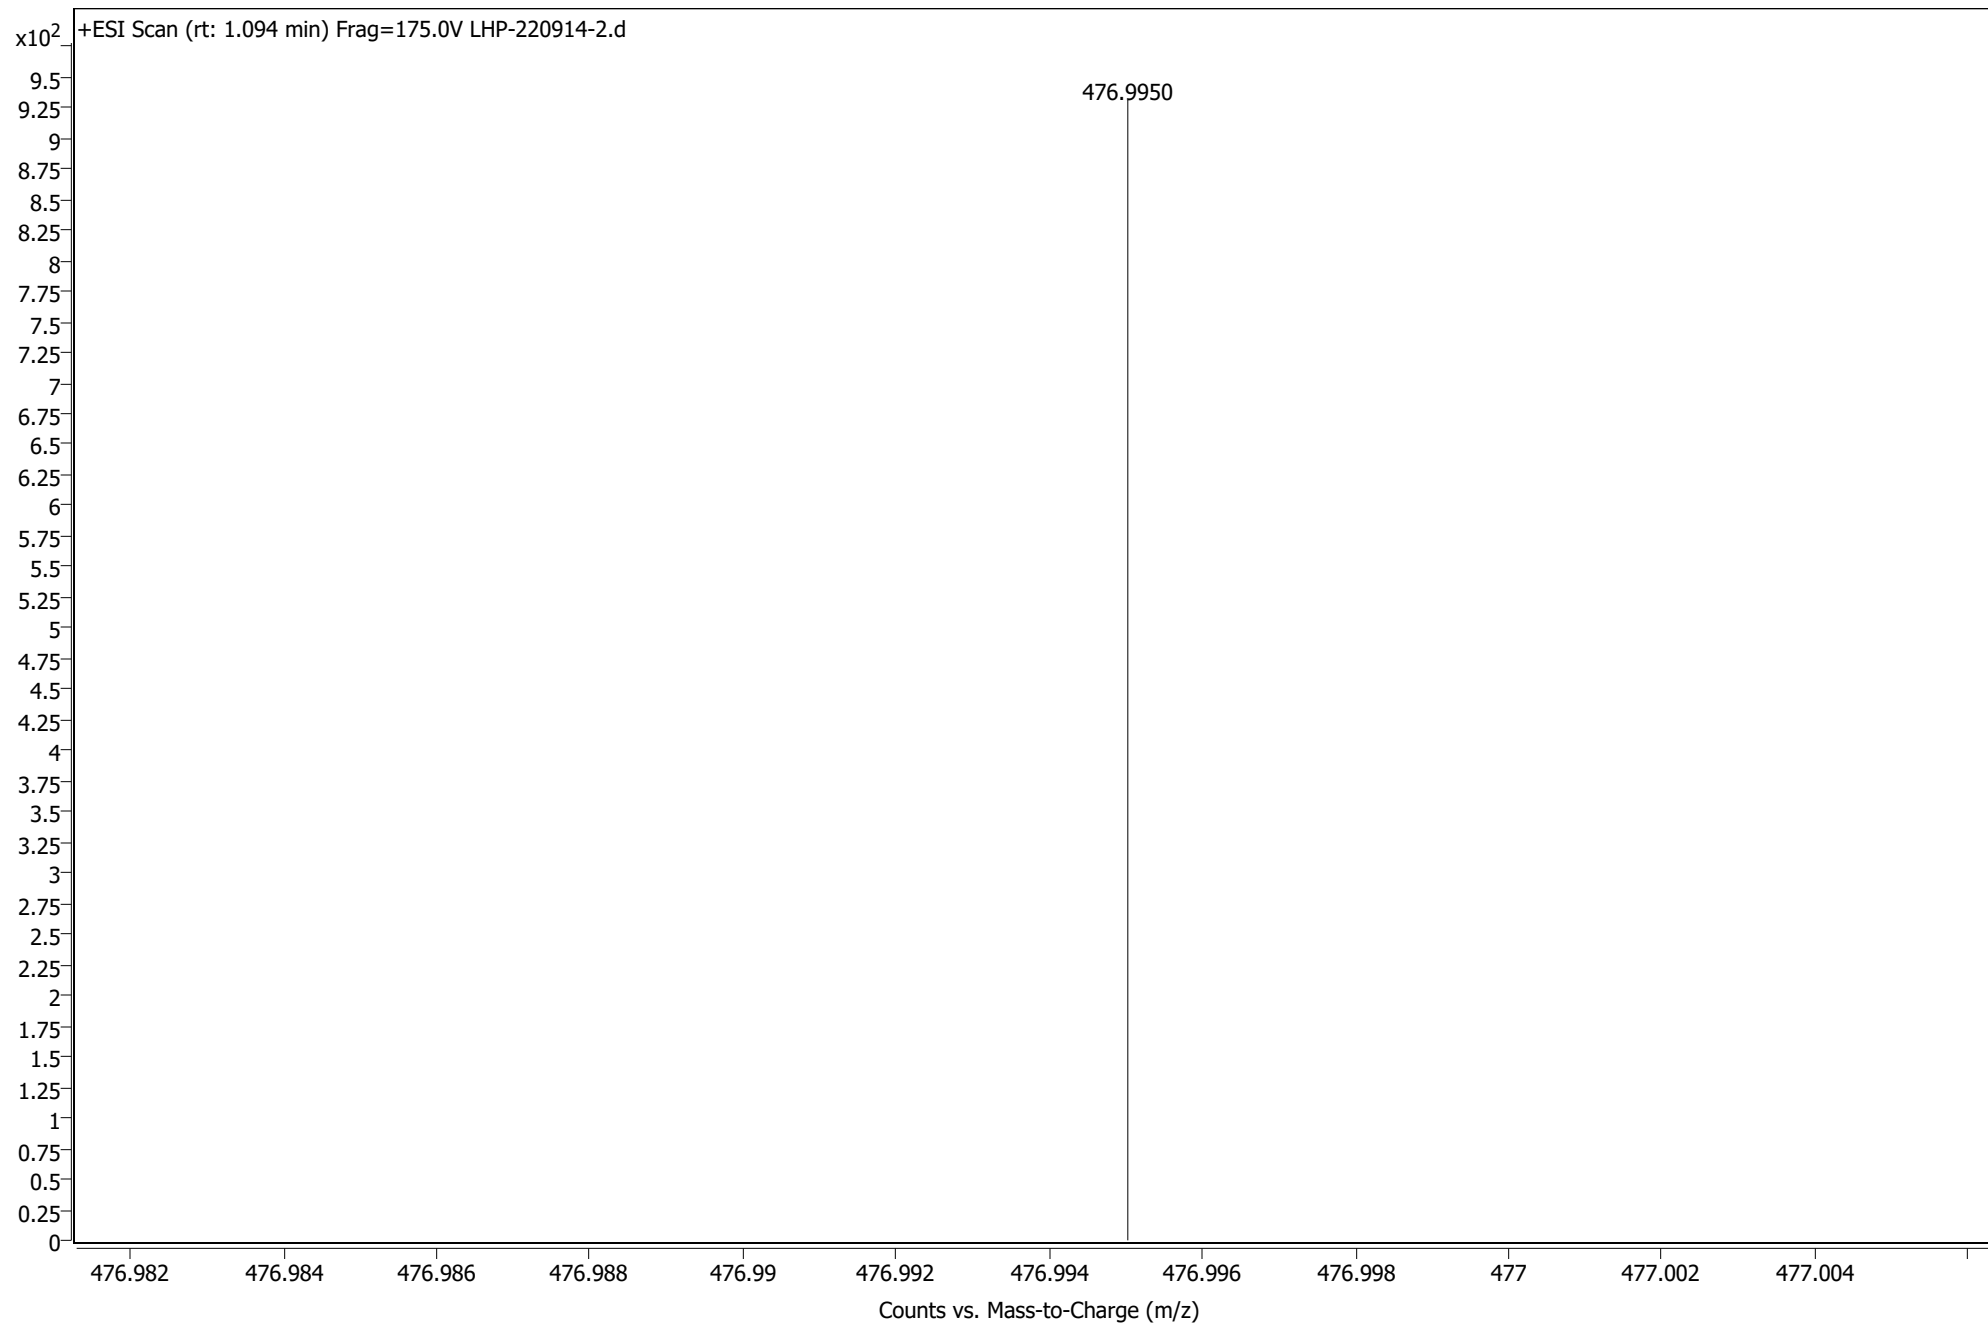

Supplement: d2cc06324g2.zip [file d2cc06324g2.zip]

# Spectrum Plot Report

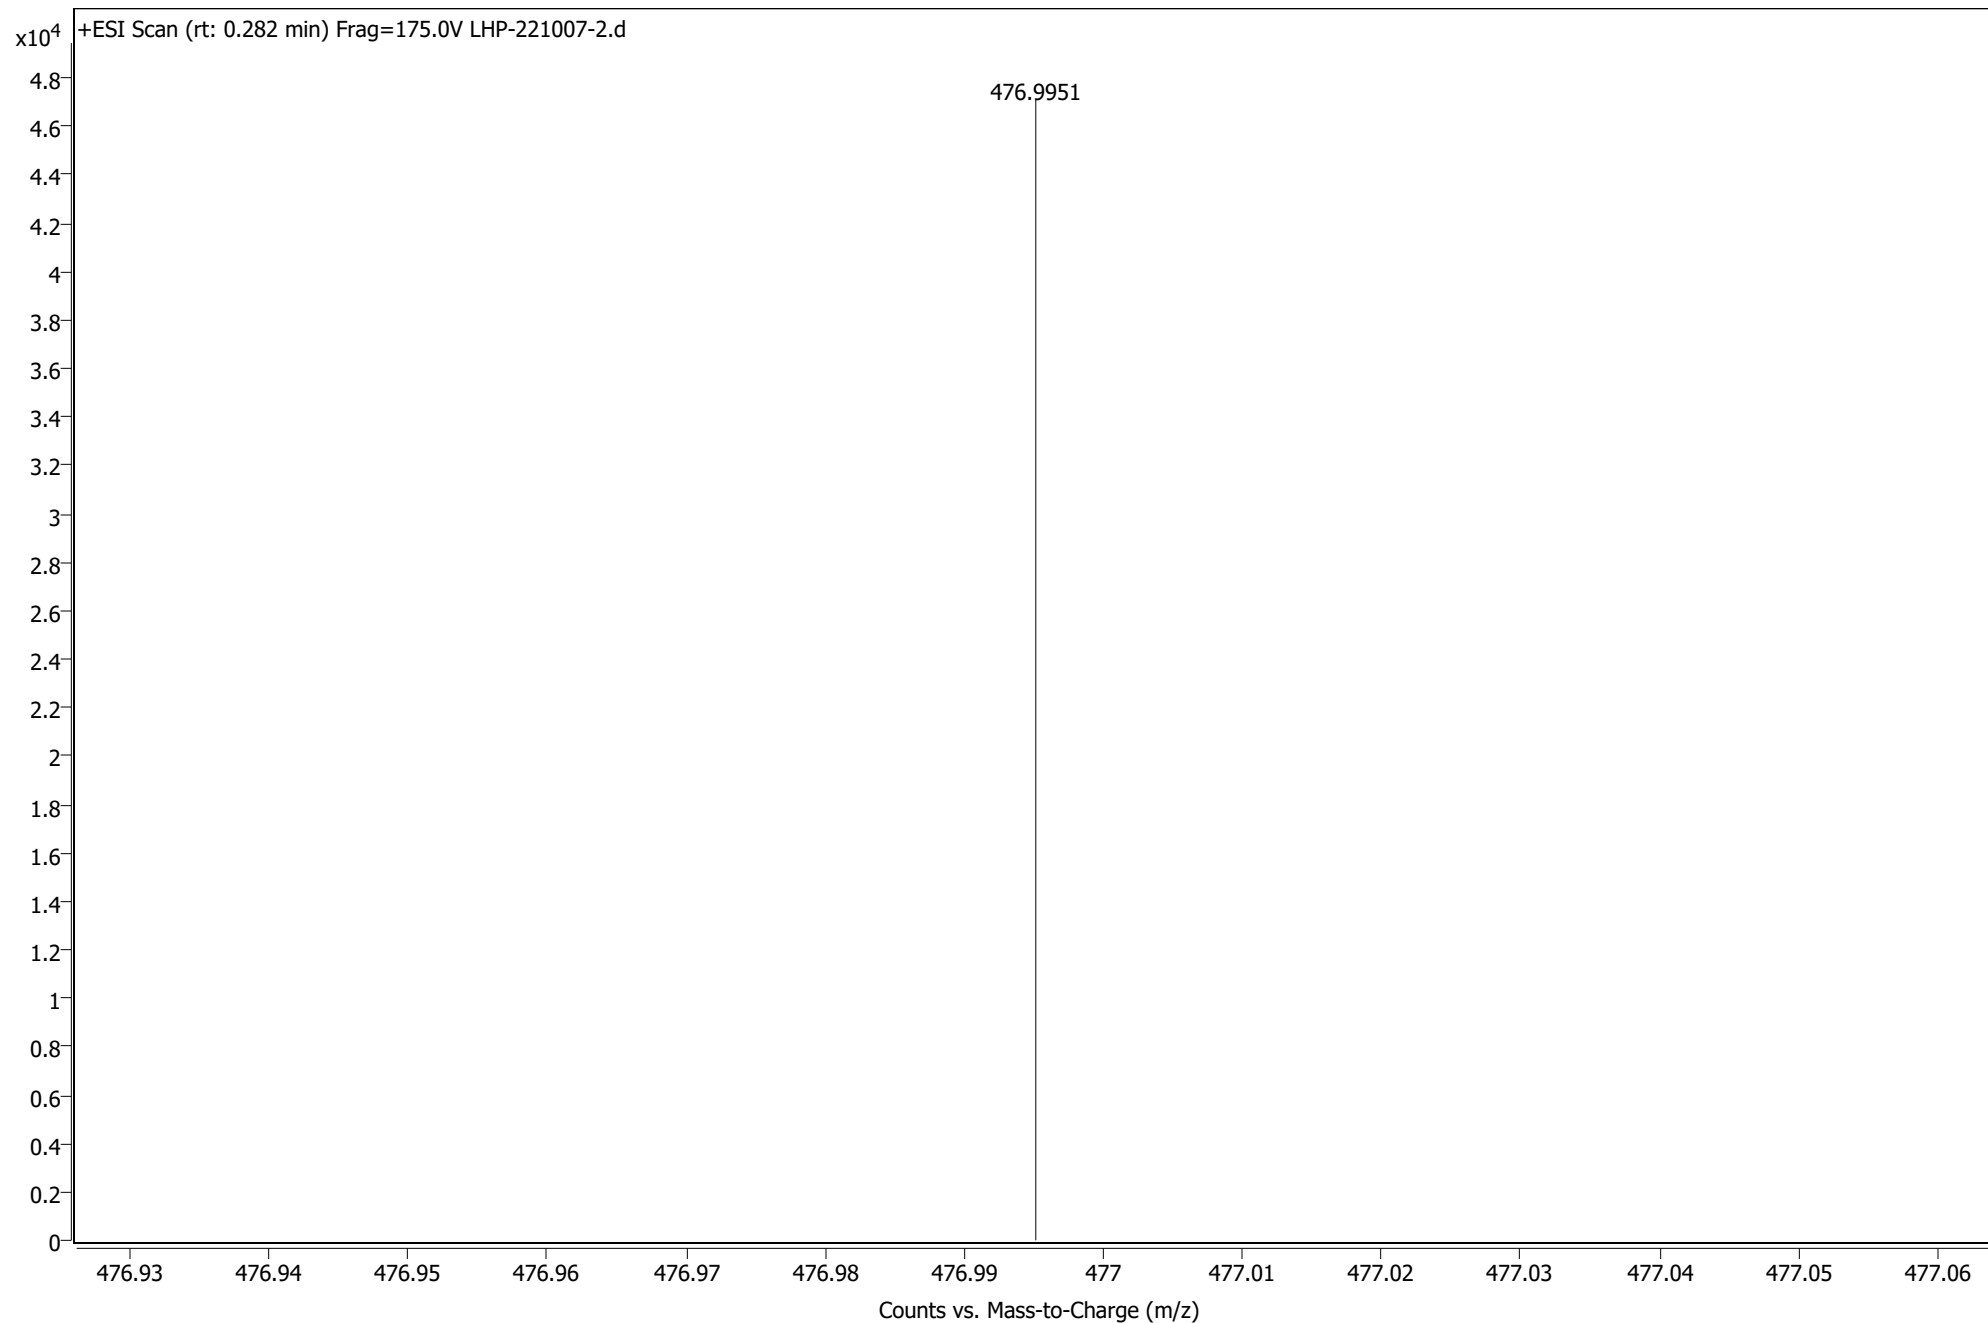

Supplement: d2cc06324g2.zip [file d2cc06324g2.zip]

# Spectrum Plot Report

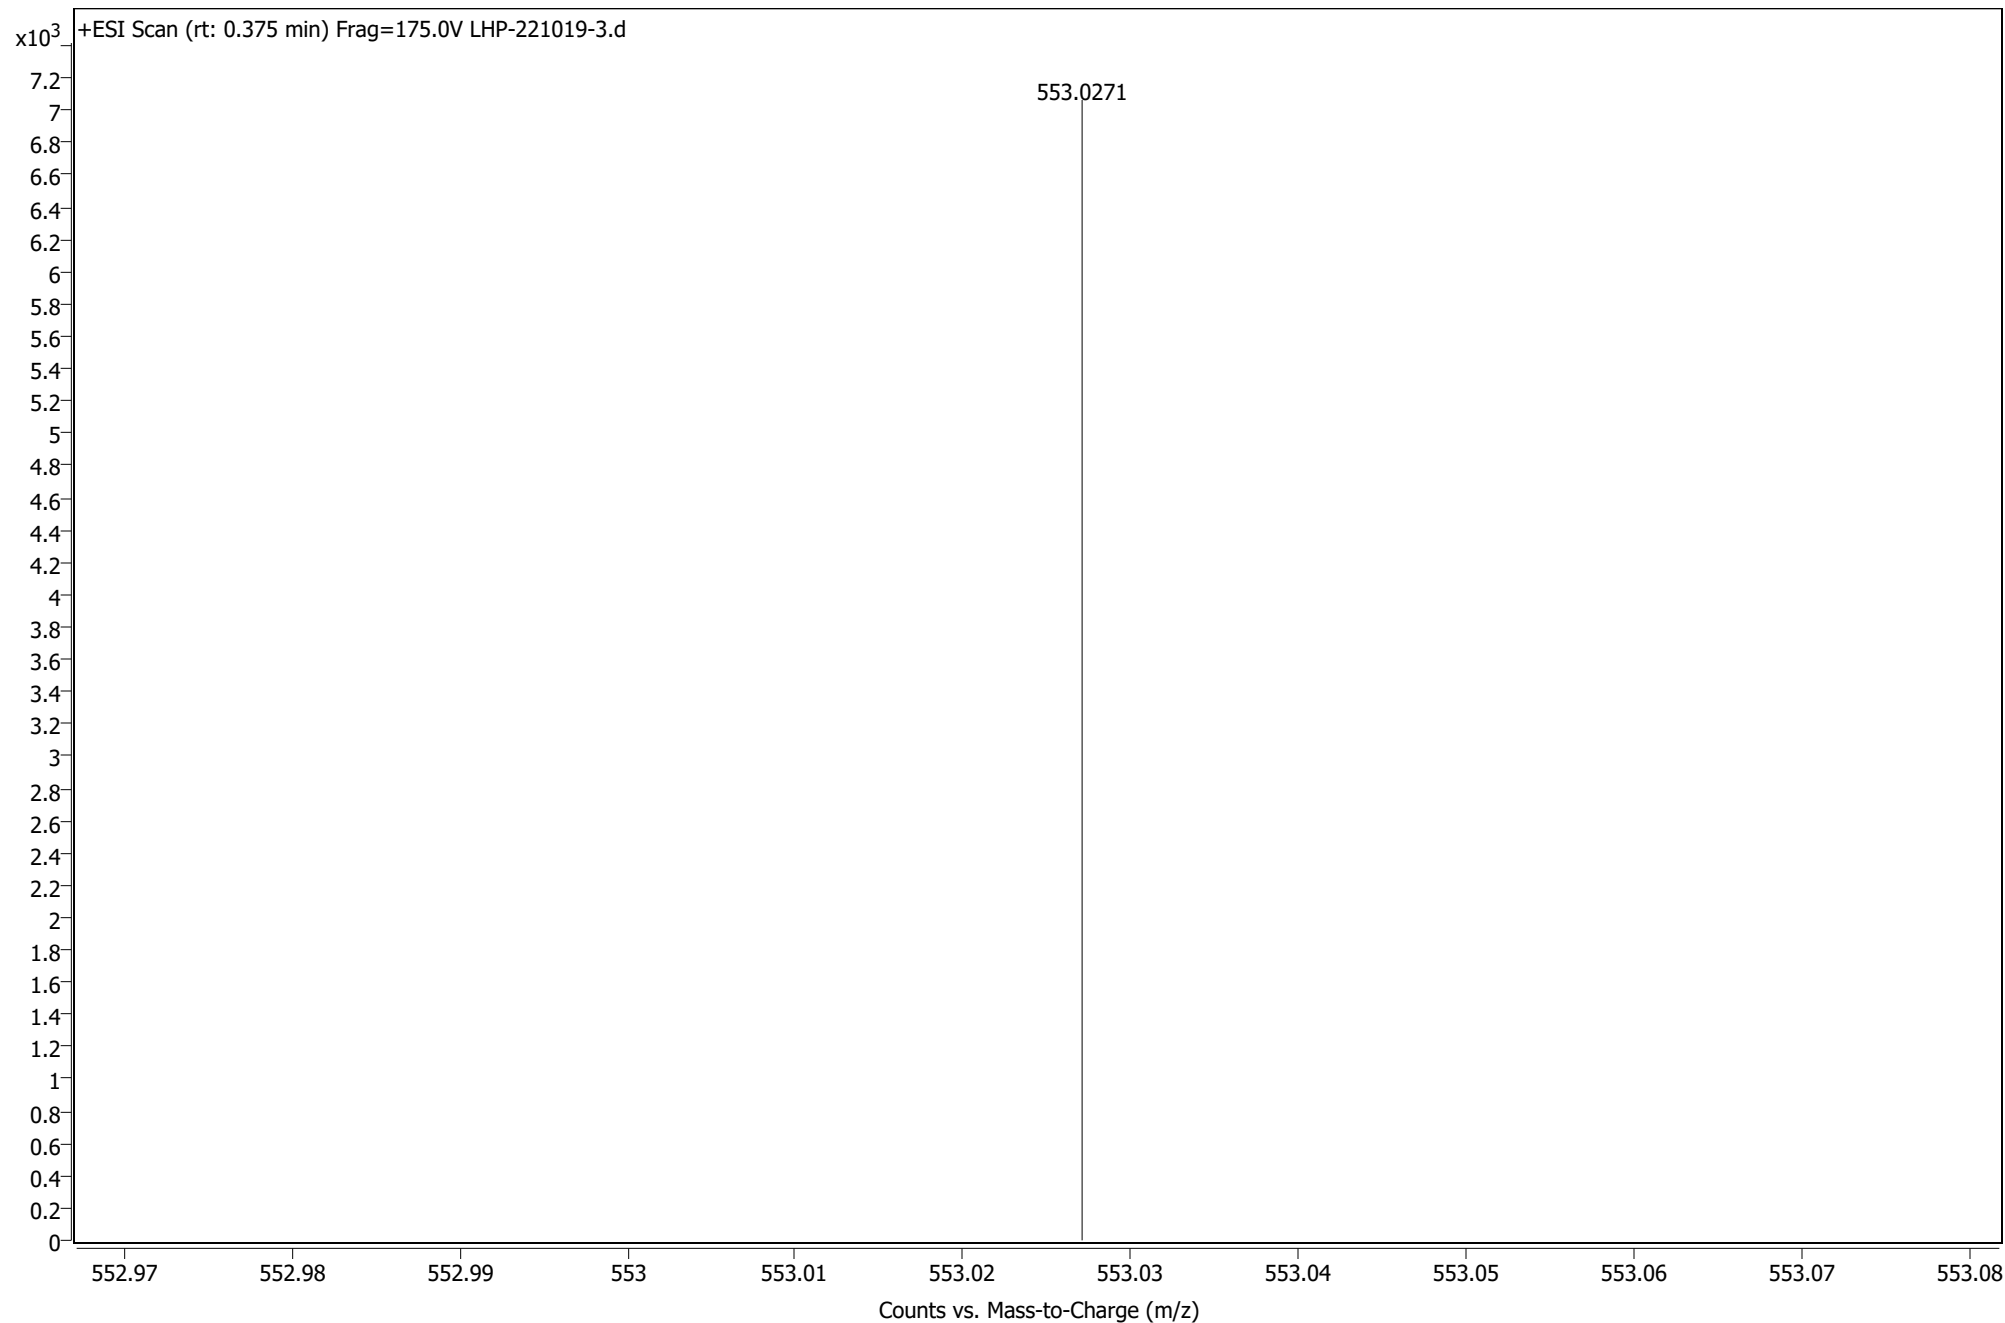

Supplement: d2cc06324g2.zip [file d2cc06324g2.zip]

# Spectrum Plot Report

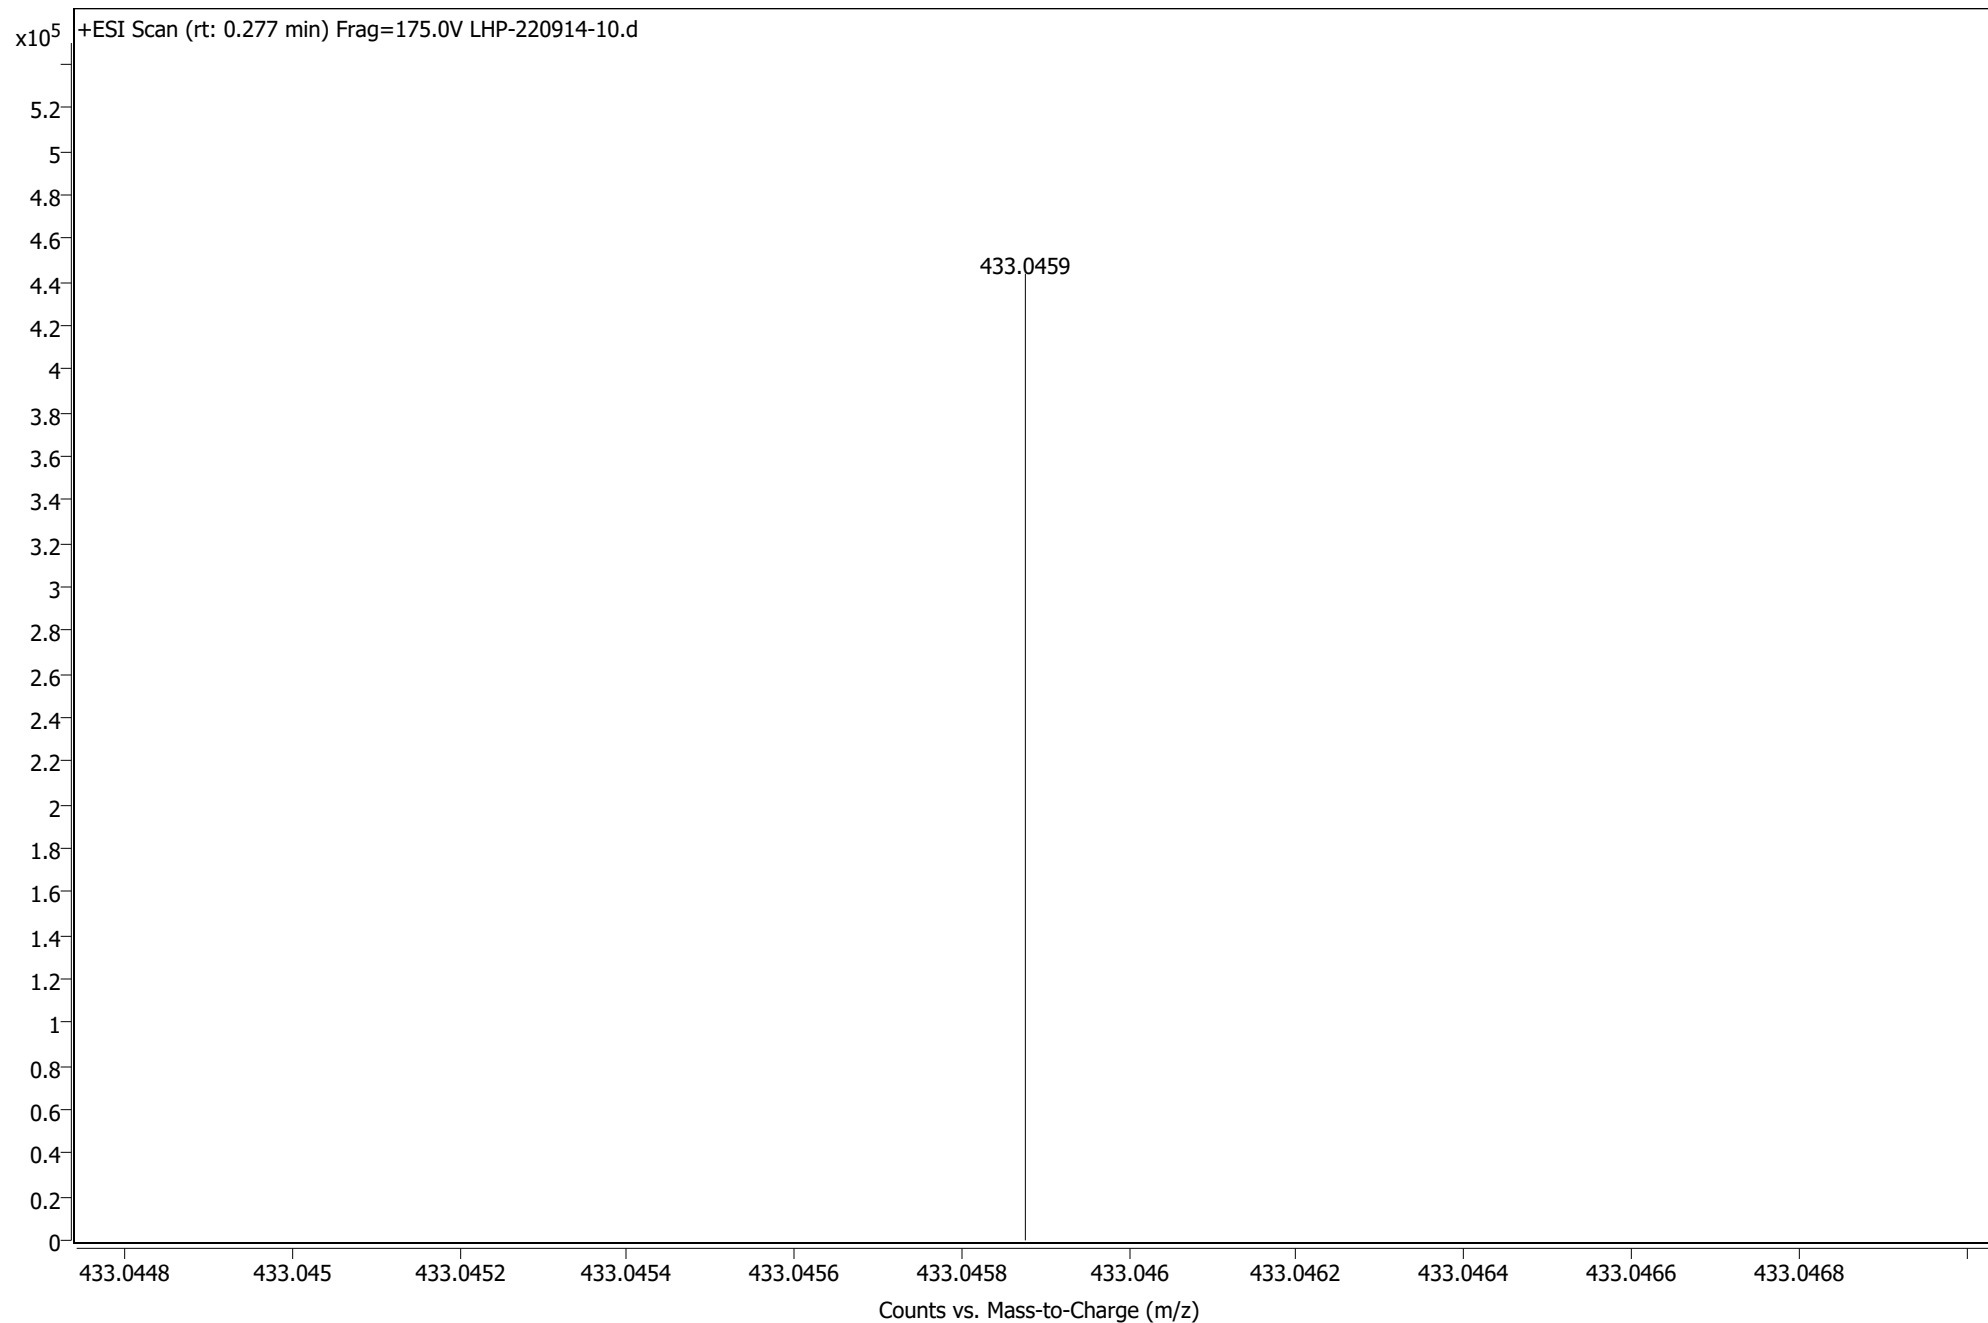

Supplement: d2cc06324g2.zip [file d2cc06324g2.zip]

# Spectrum Plot Report

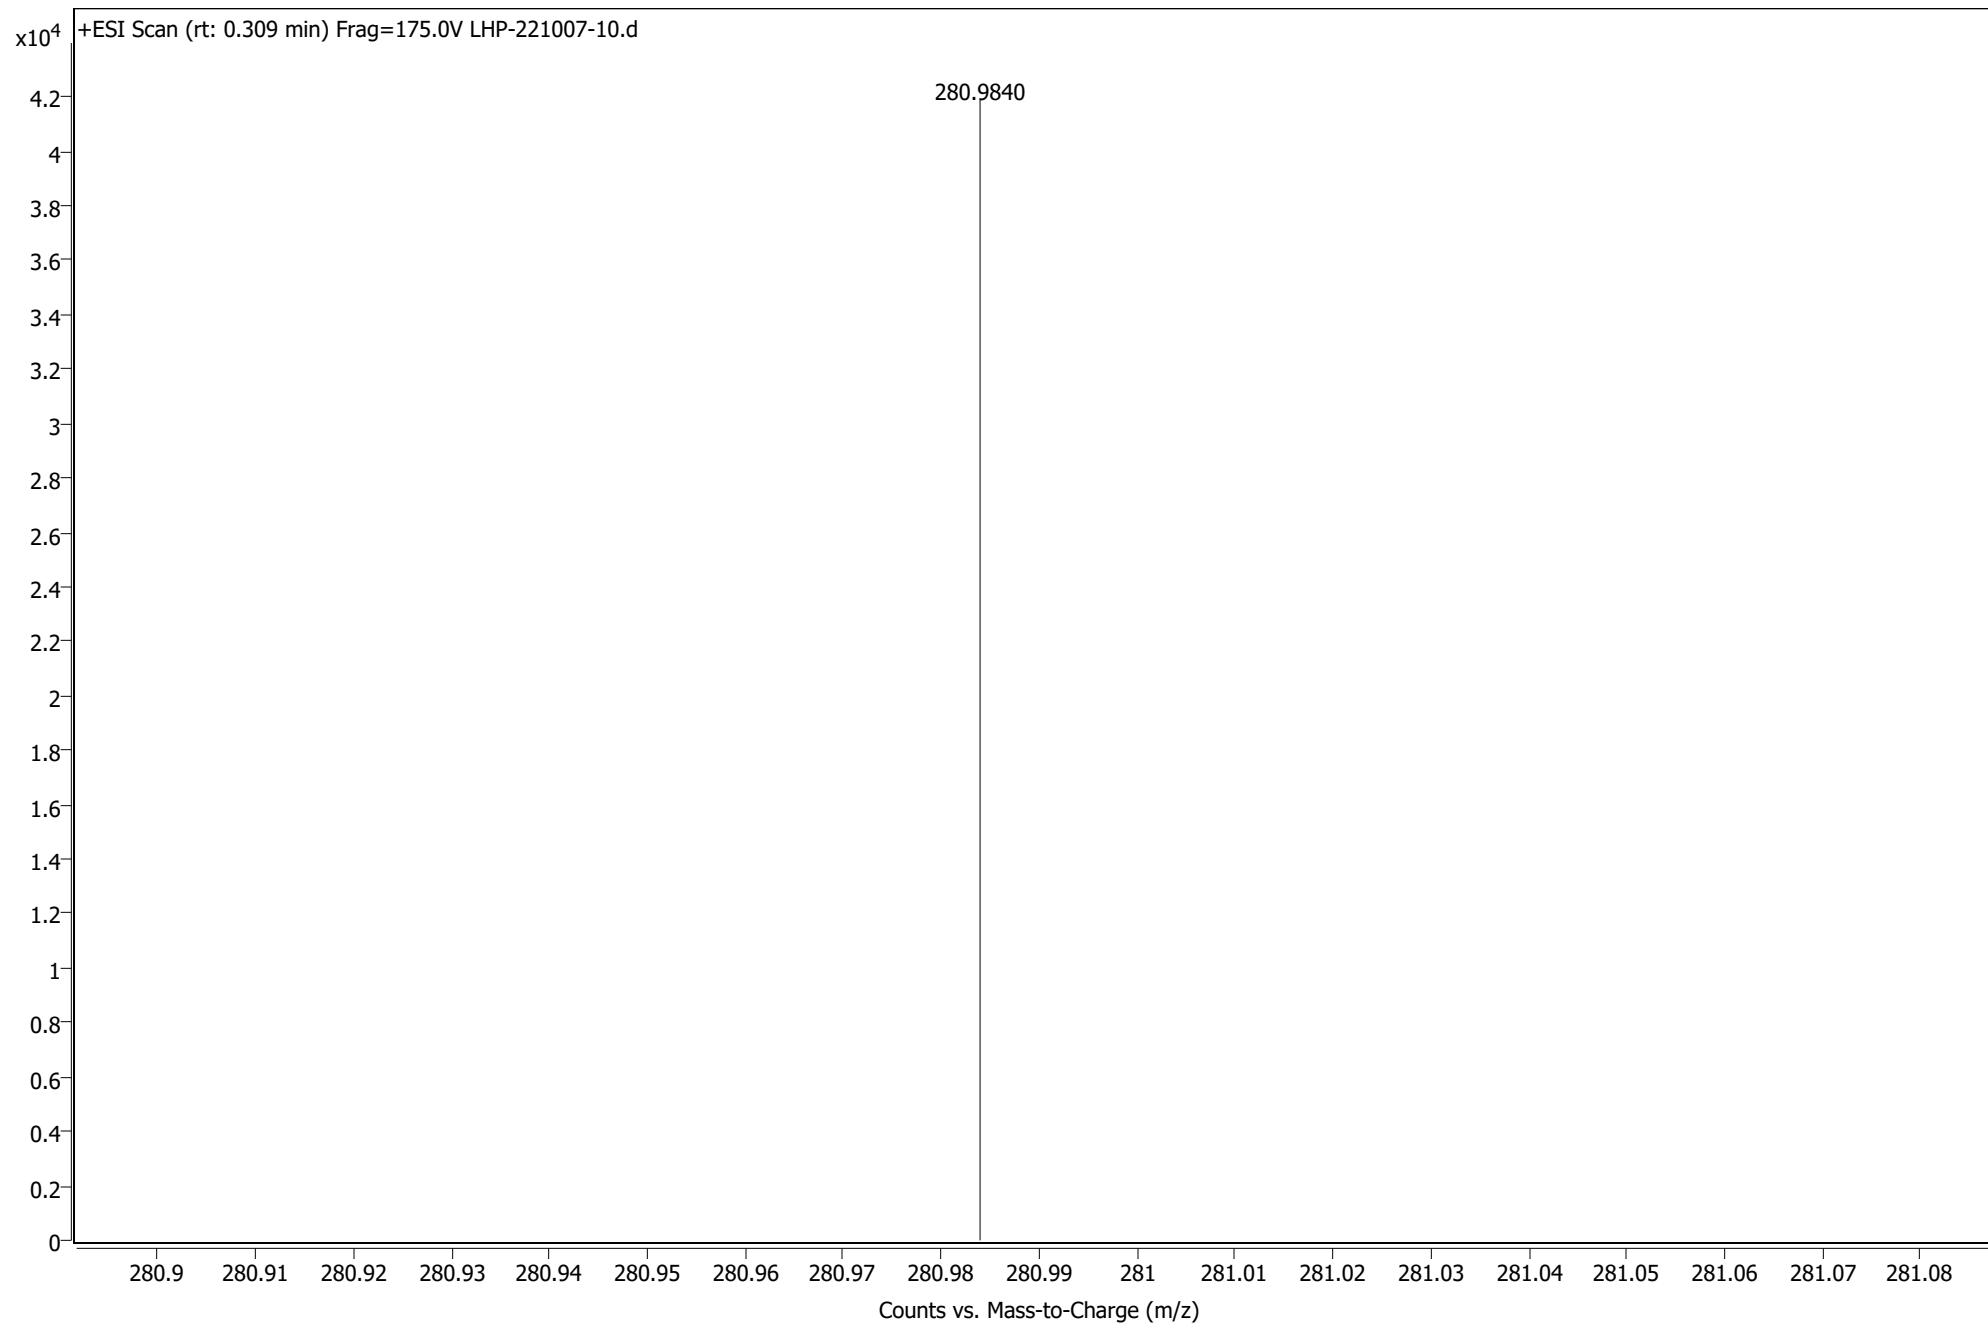

Supplement: d2cc06324g2.zip [file d2cc06324g2.zip]

# Spectrum Plot Report

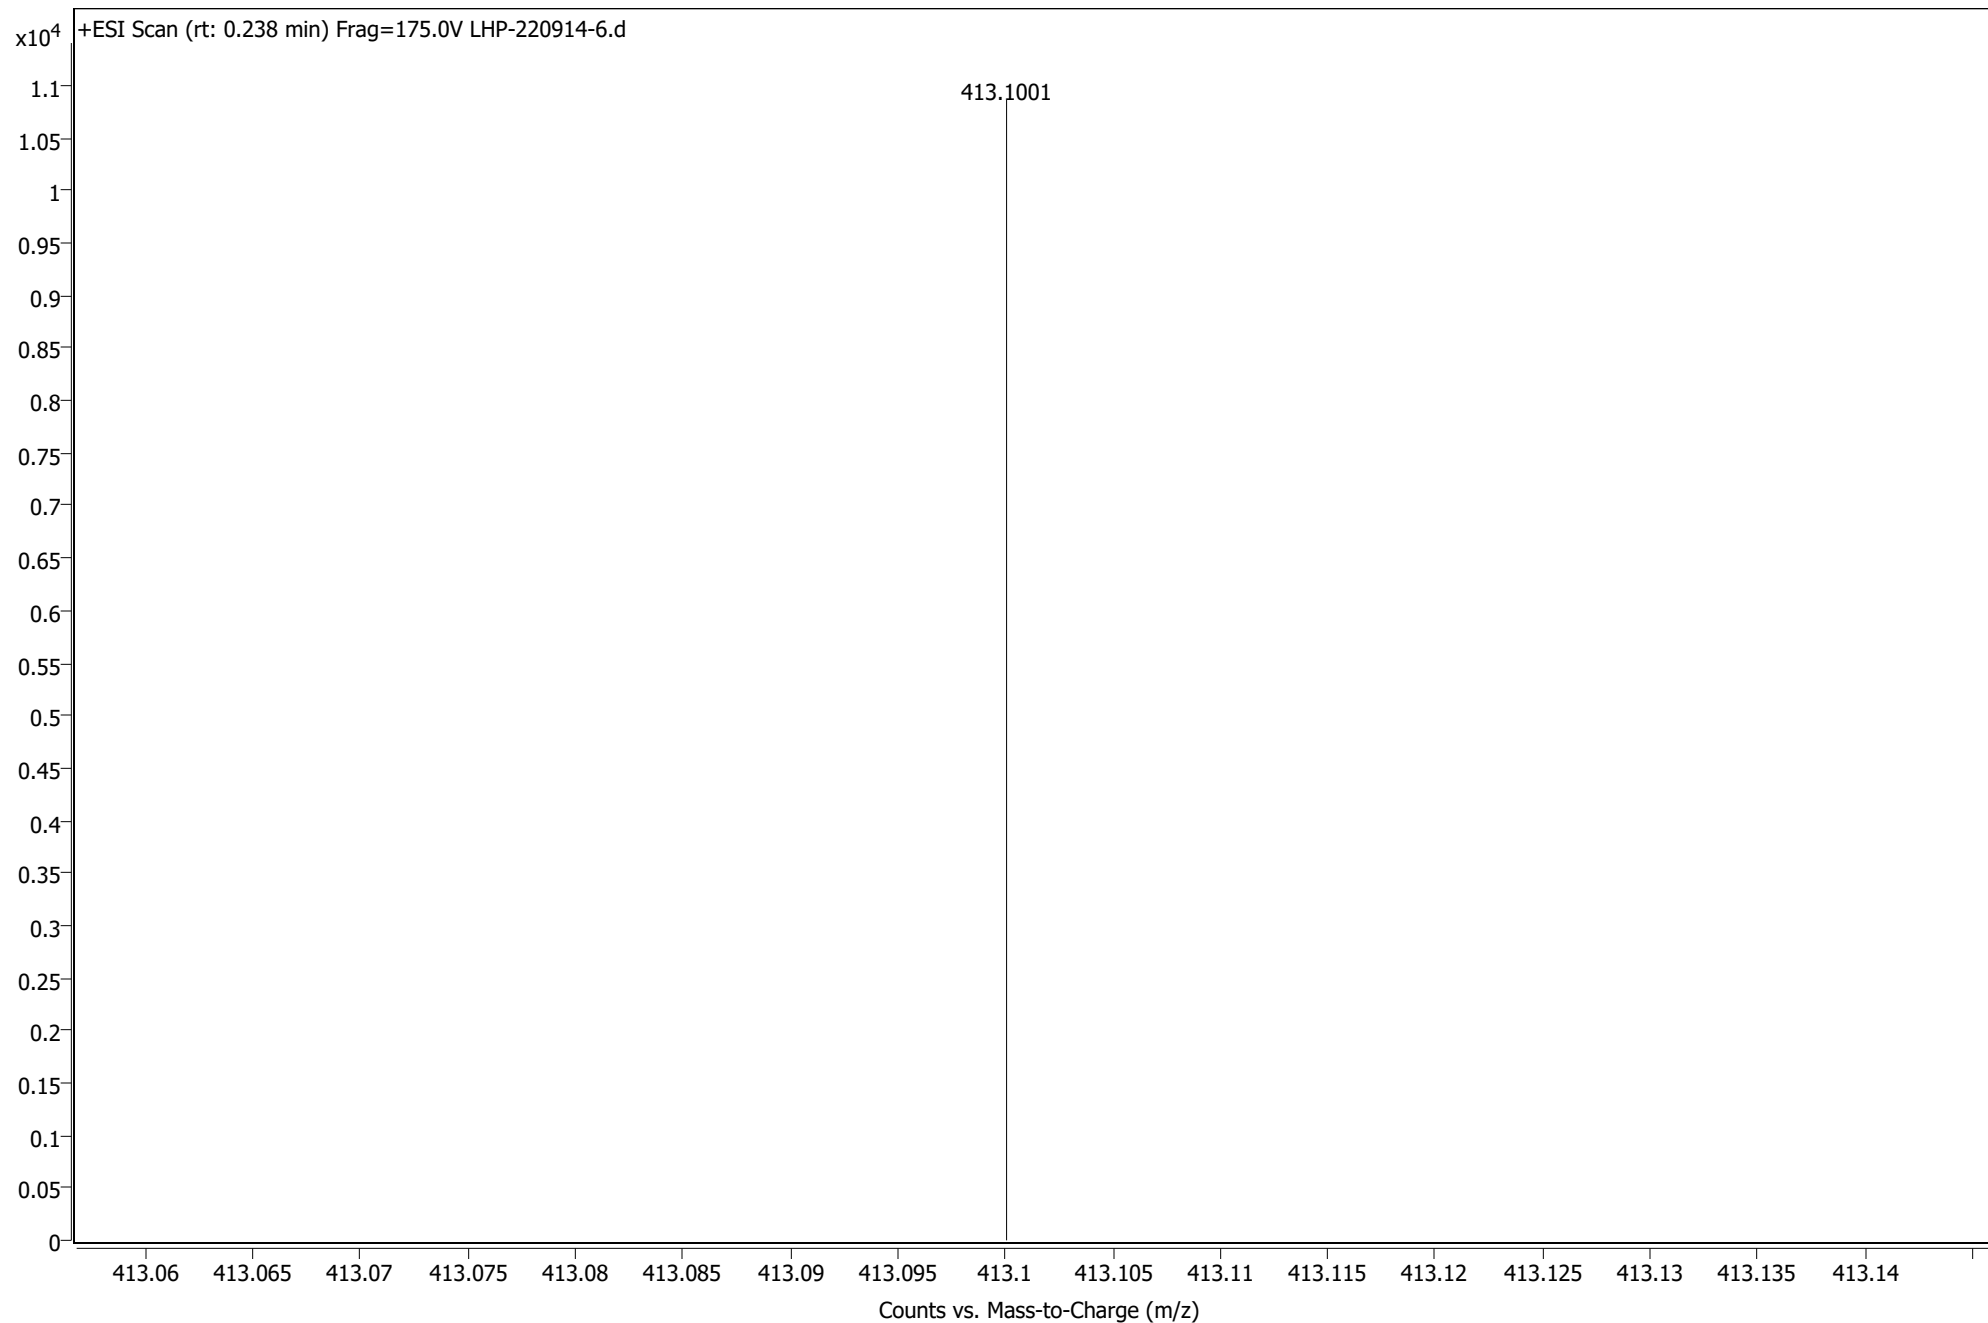

Supplement: d2cc06324g2.zip [file d2cc06324g2.zip]

# Spectrum Plot Report

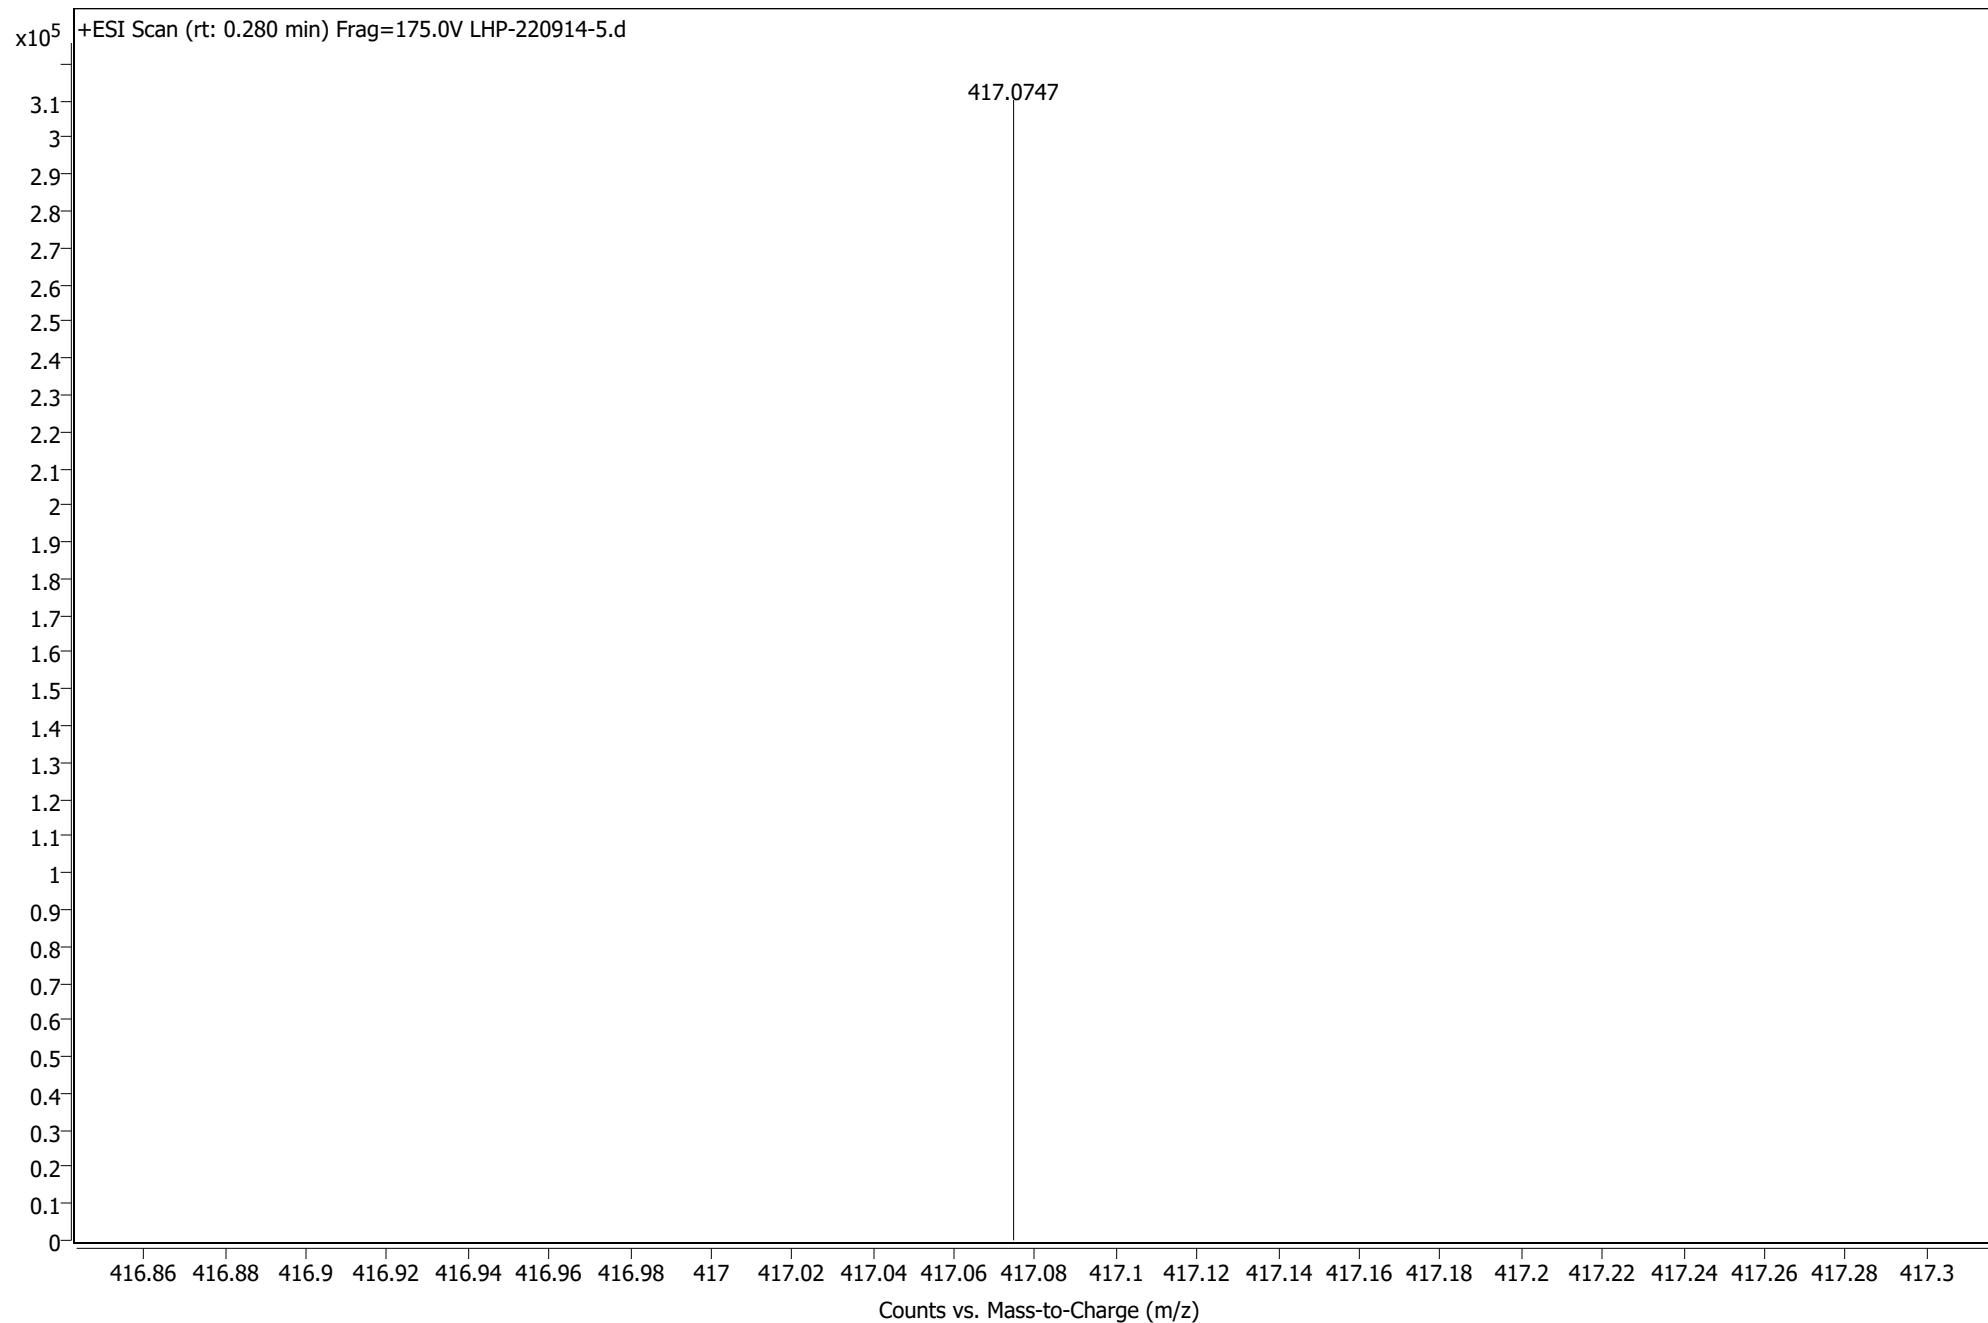

Supplement: d2cc06324g2.zip [file d2cc06324g2.zip]

# Spectrum Plot Report

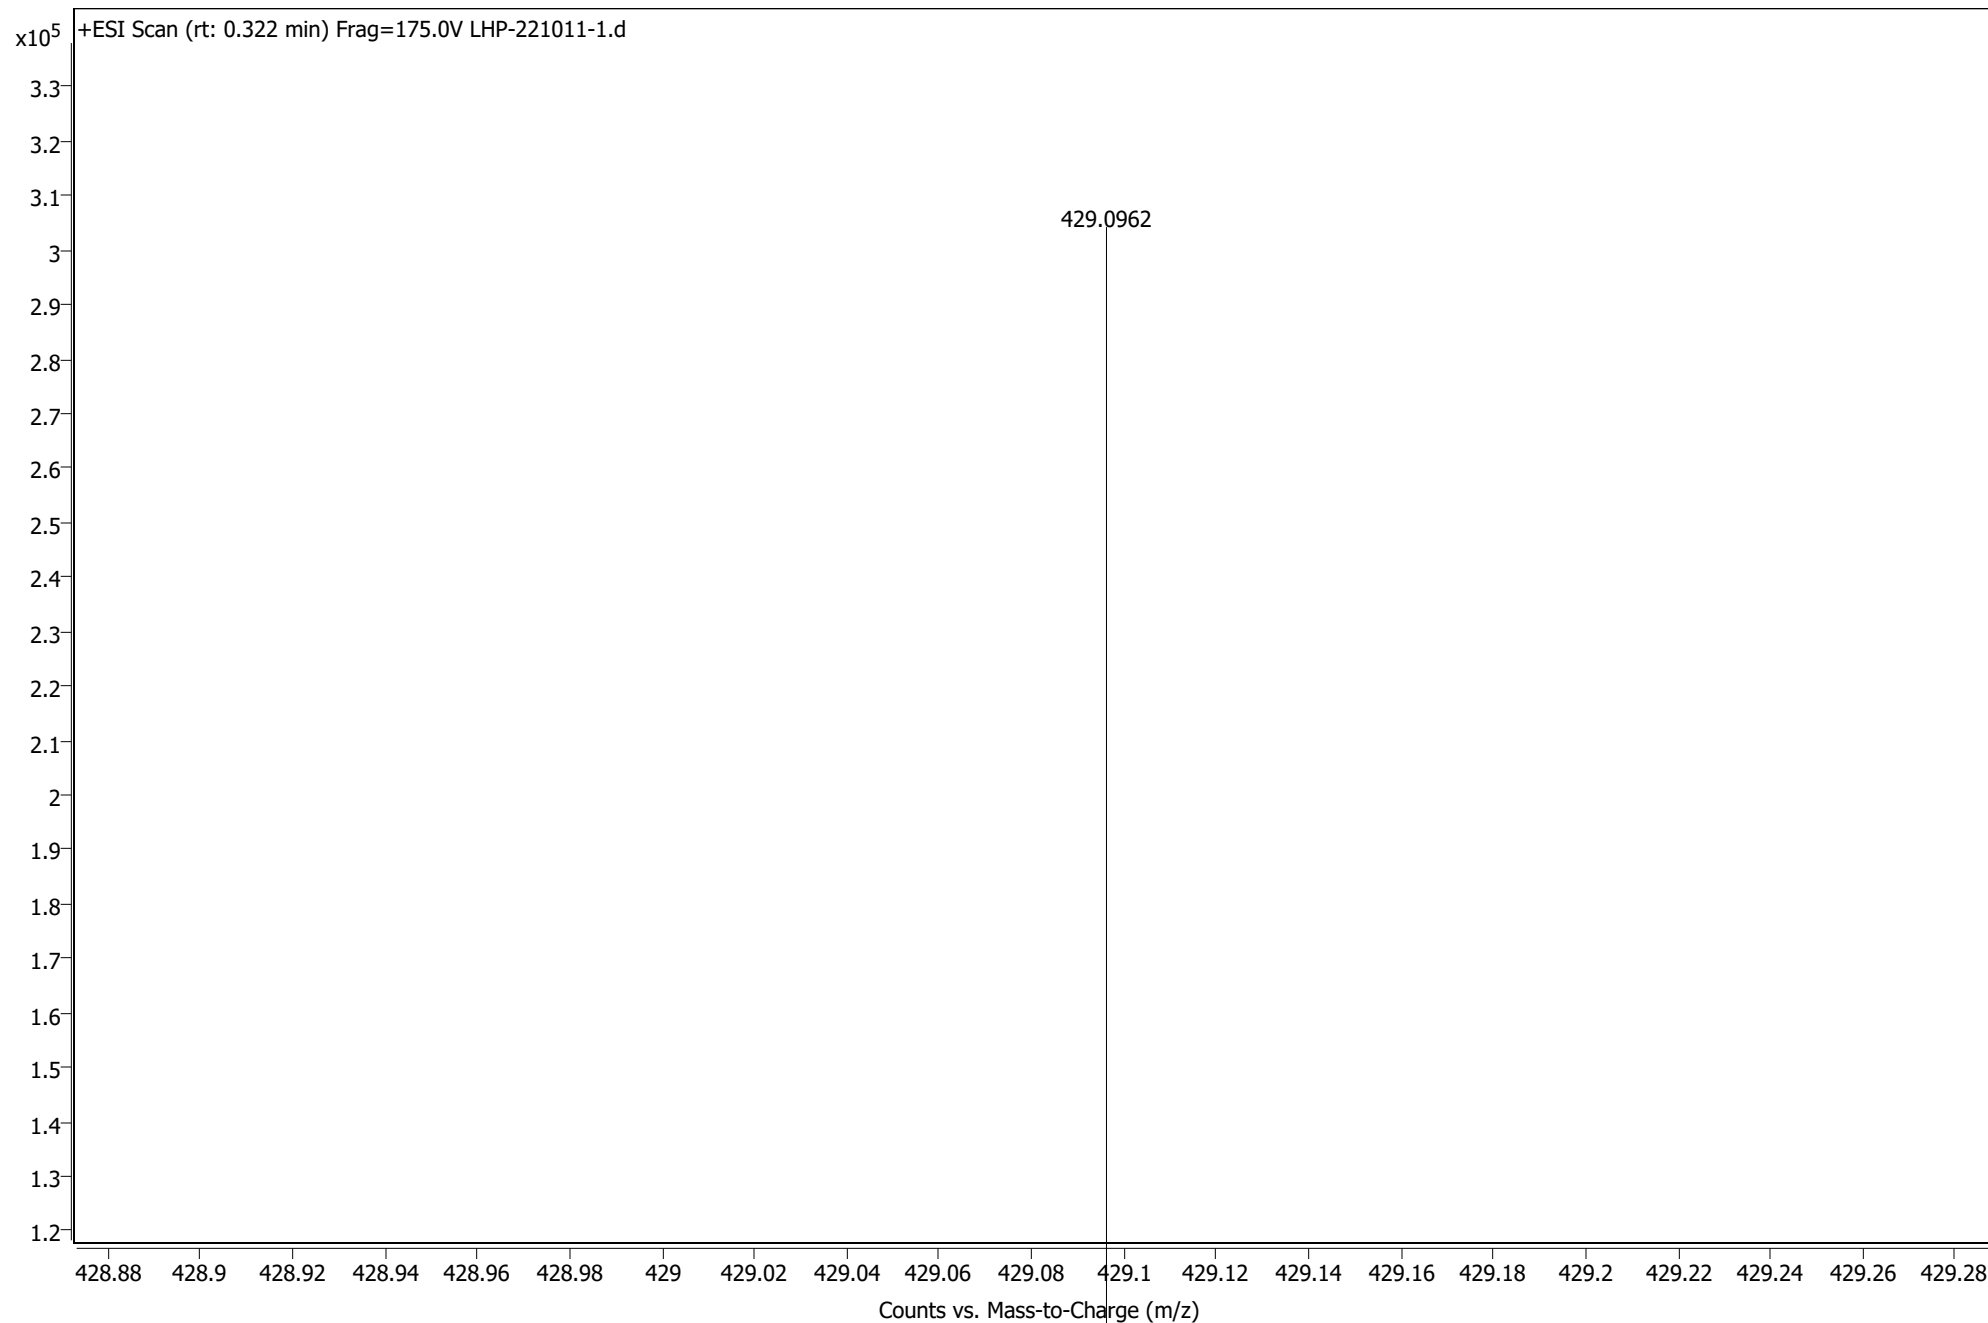

Supplement: d2cc06324g2.zip [file d2cc06324g2.zip]

# Spectrum Plot Report

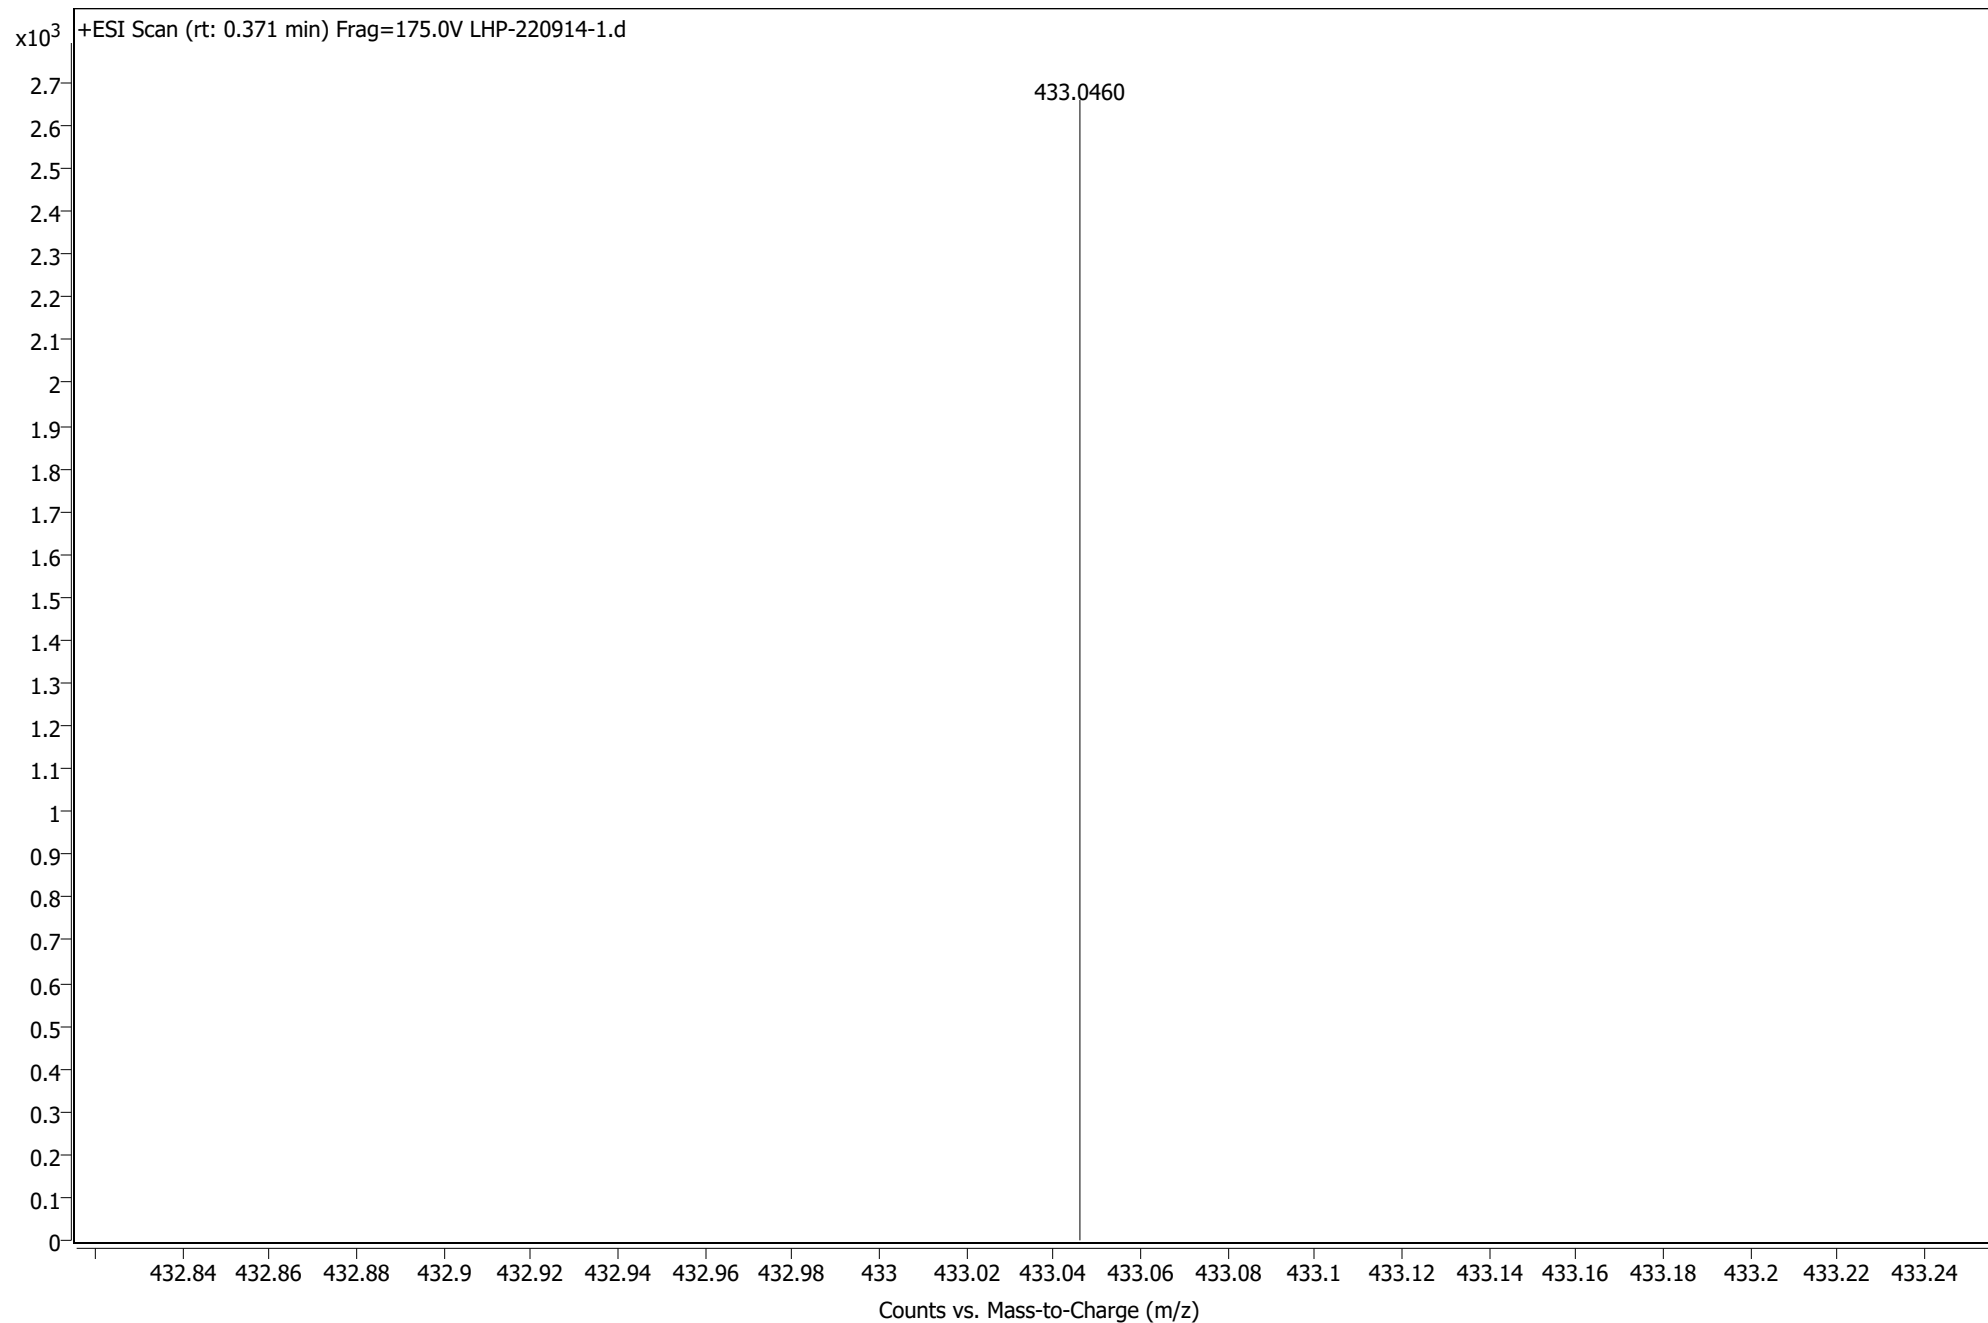

Supplement: d2cc06324g2.zip [file d2cc06324g2.zip]

# Spectrum Plot Report

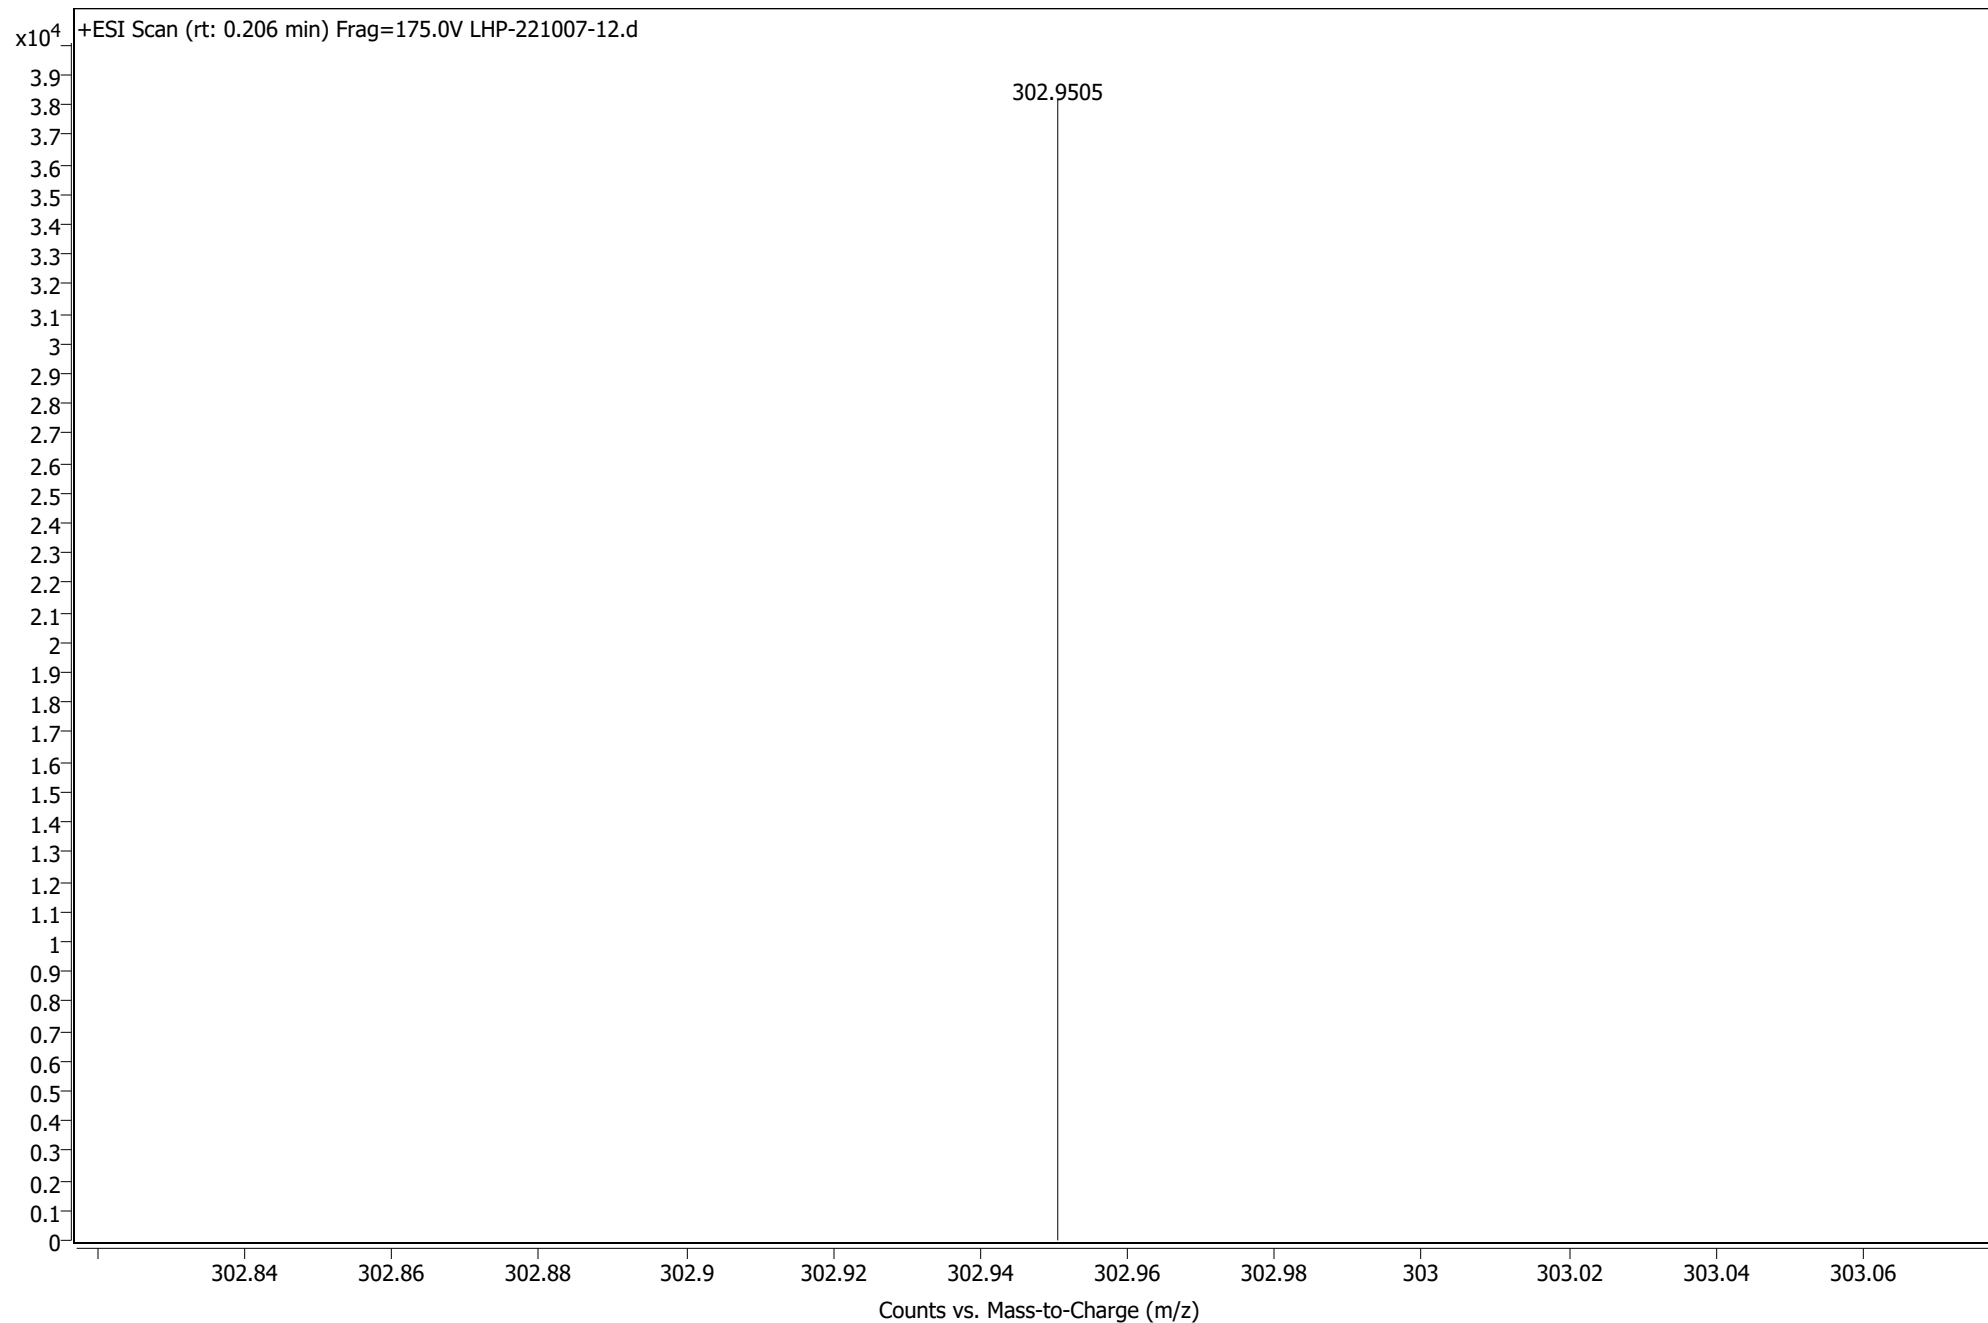

Supplement: d2cc06324g2.zip [file d2cc06324g2.zip]

# Spectrum Plot Report

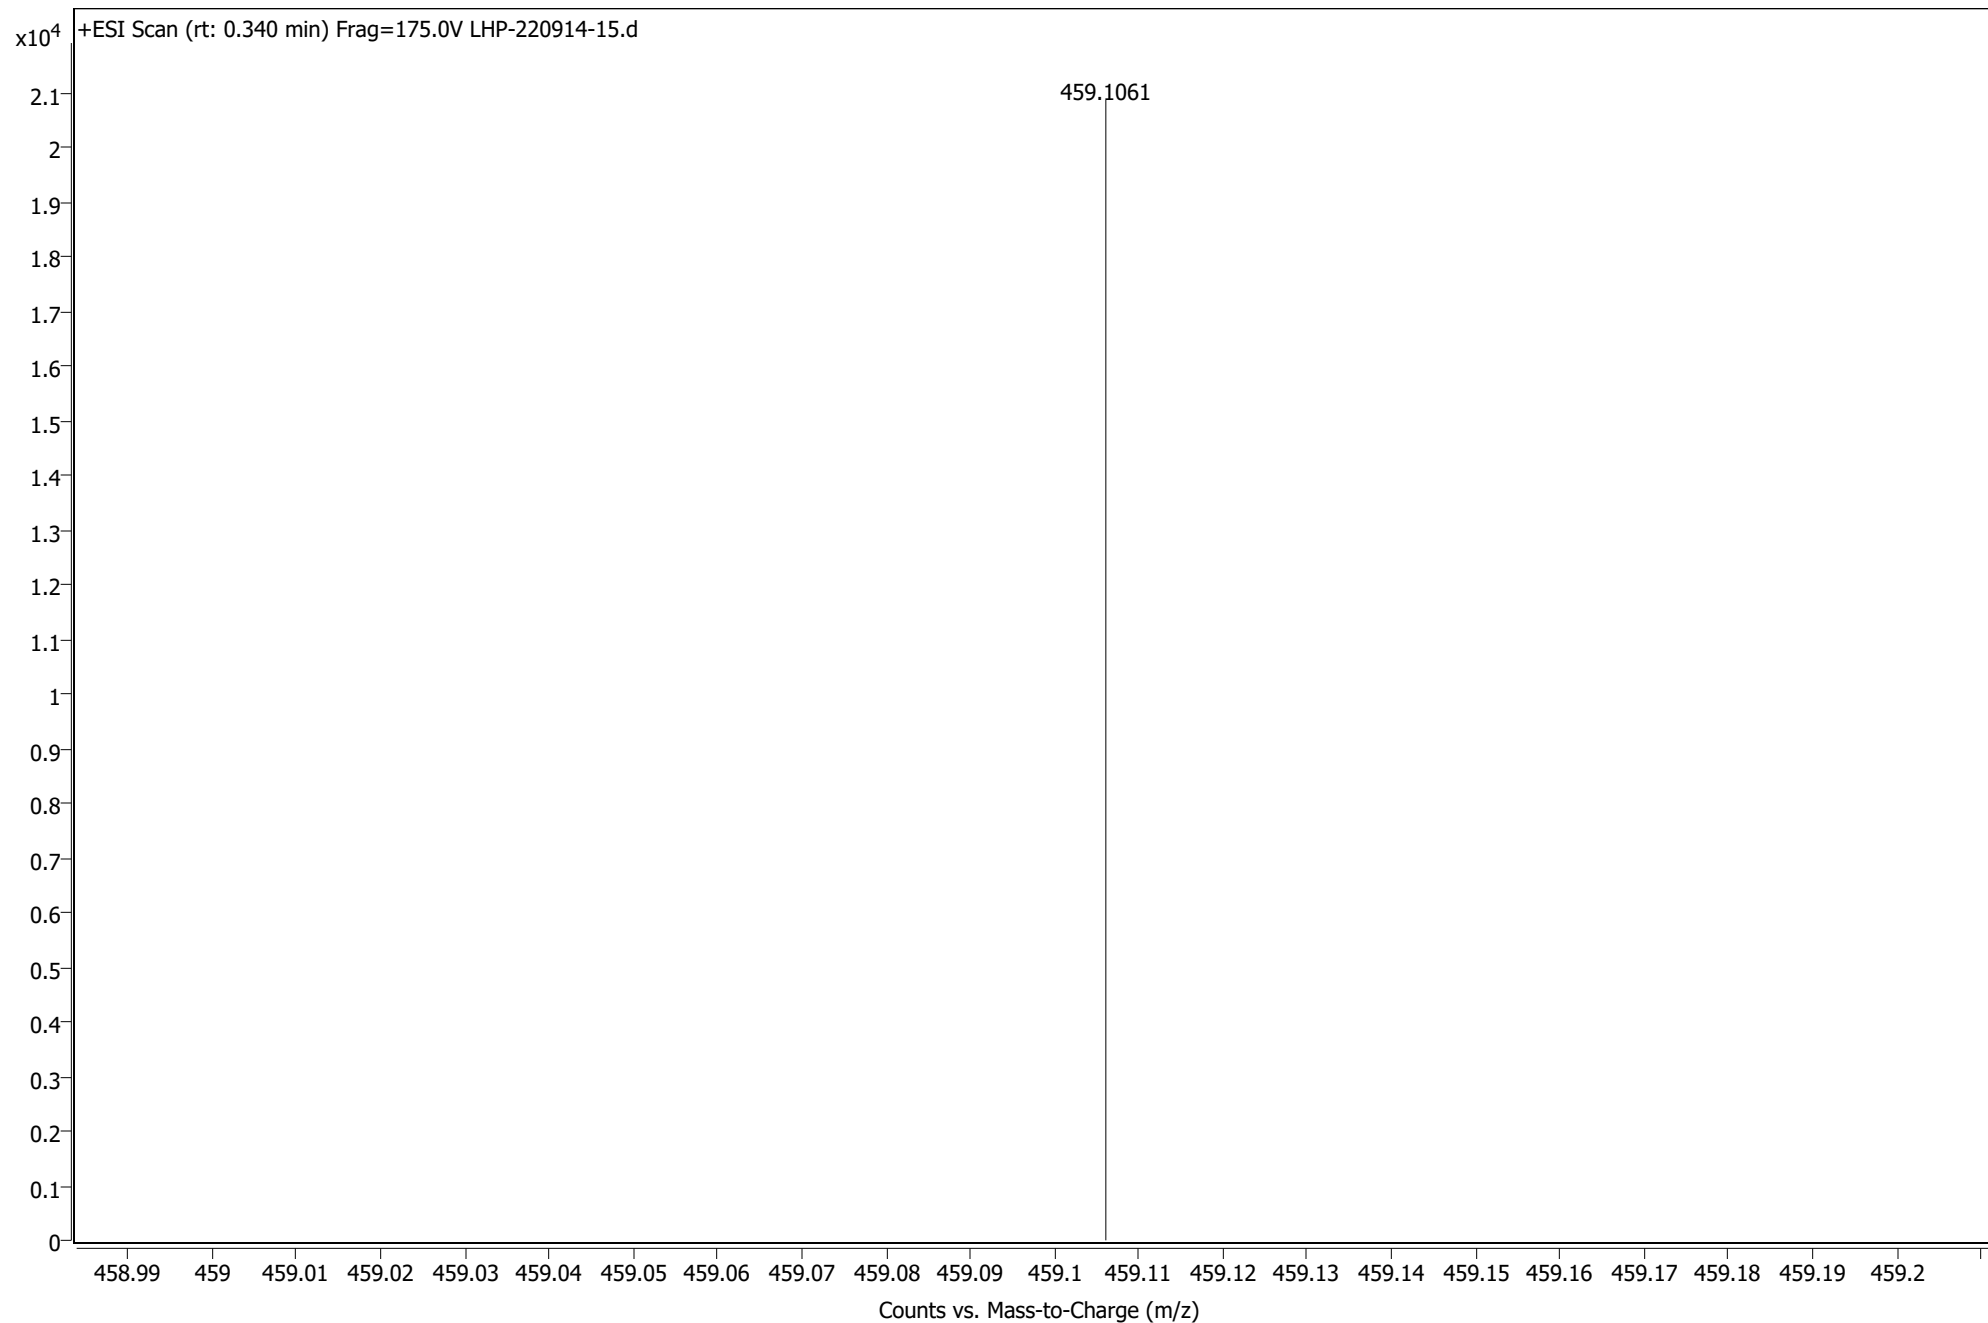

Supplement: d2cc06324g2.zip [file d2cc06324g2.zip]

# Spectrum Plot Report

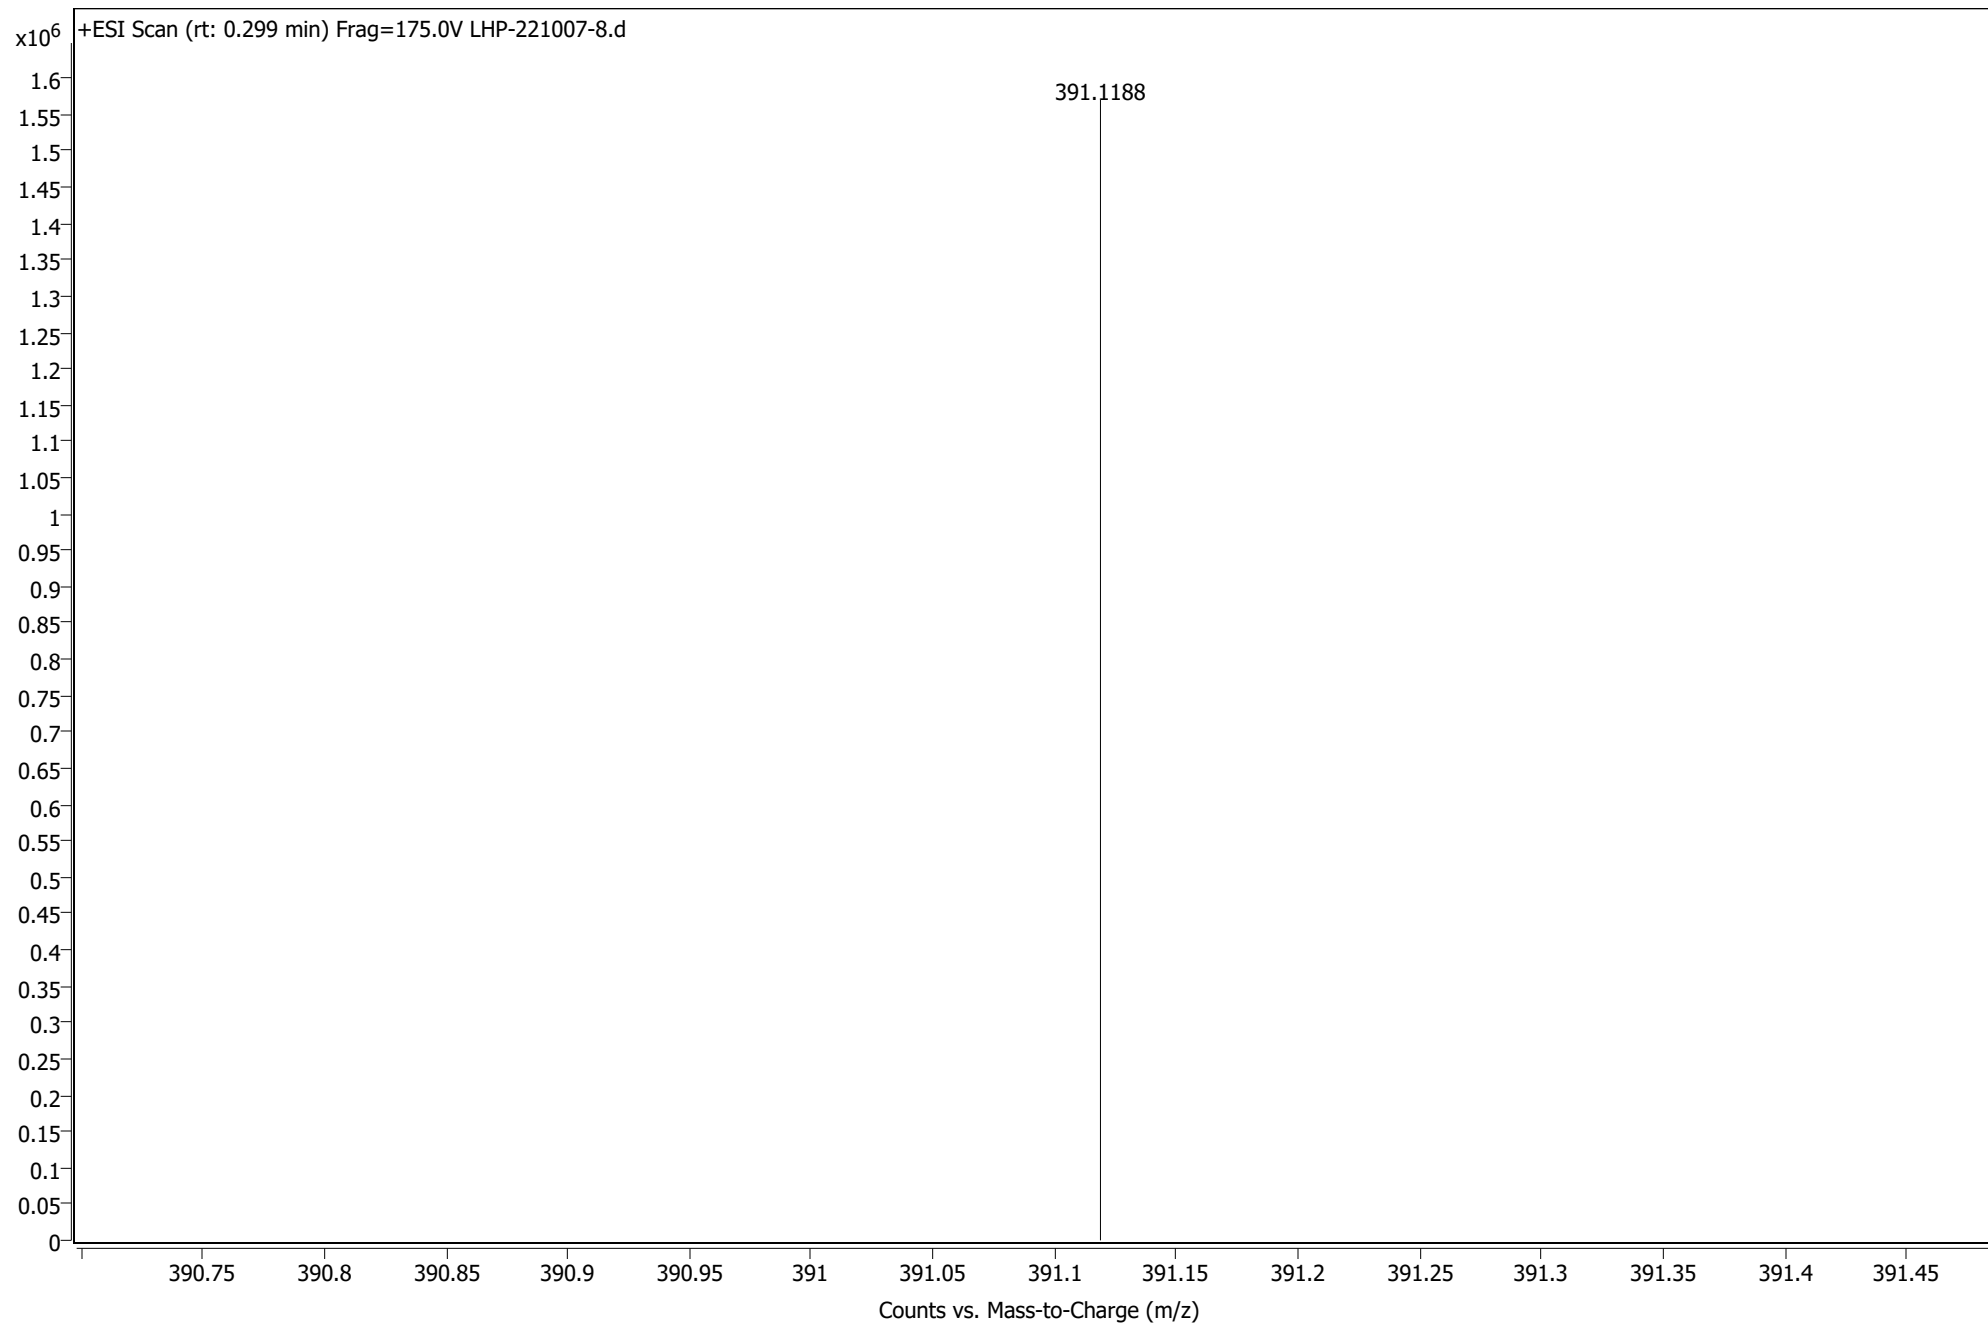

Supplement: d2cc06324g2.zip [file d2cc06324g2.zip]

# Spectrum Plot Report

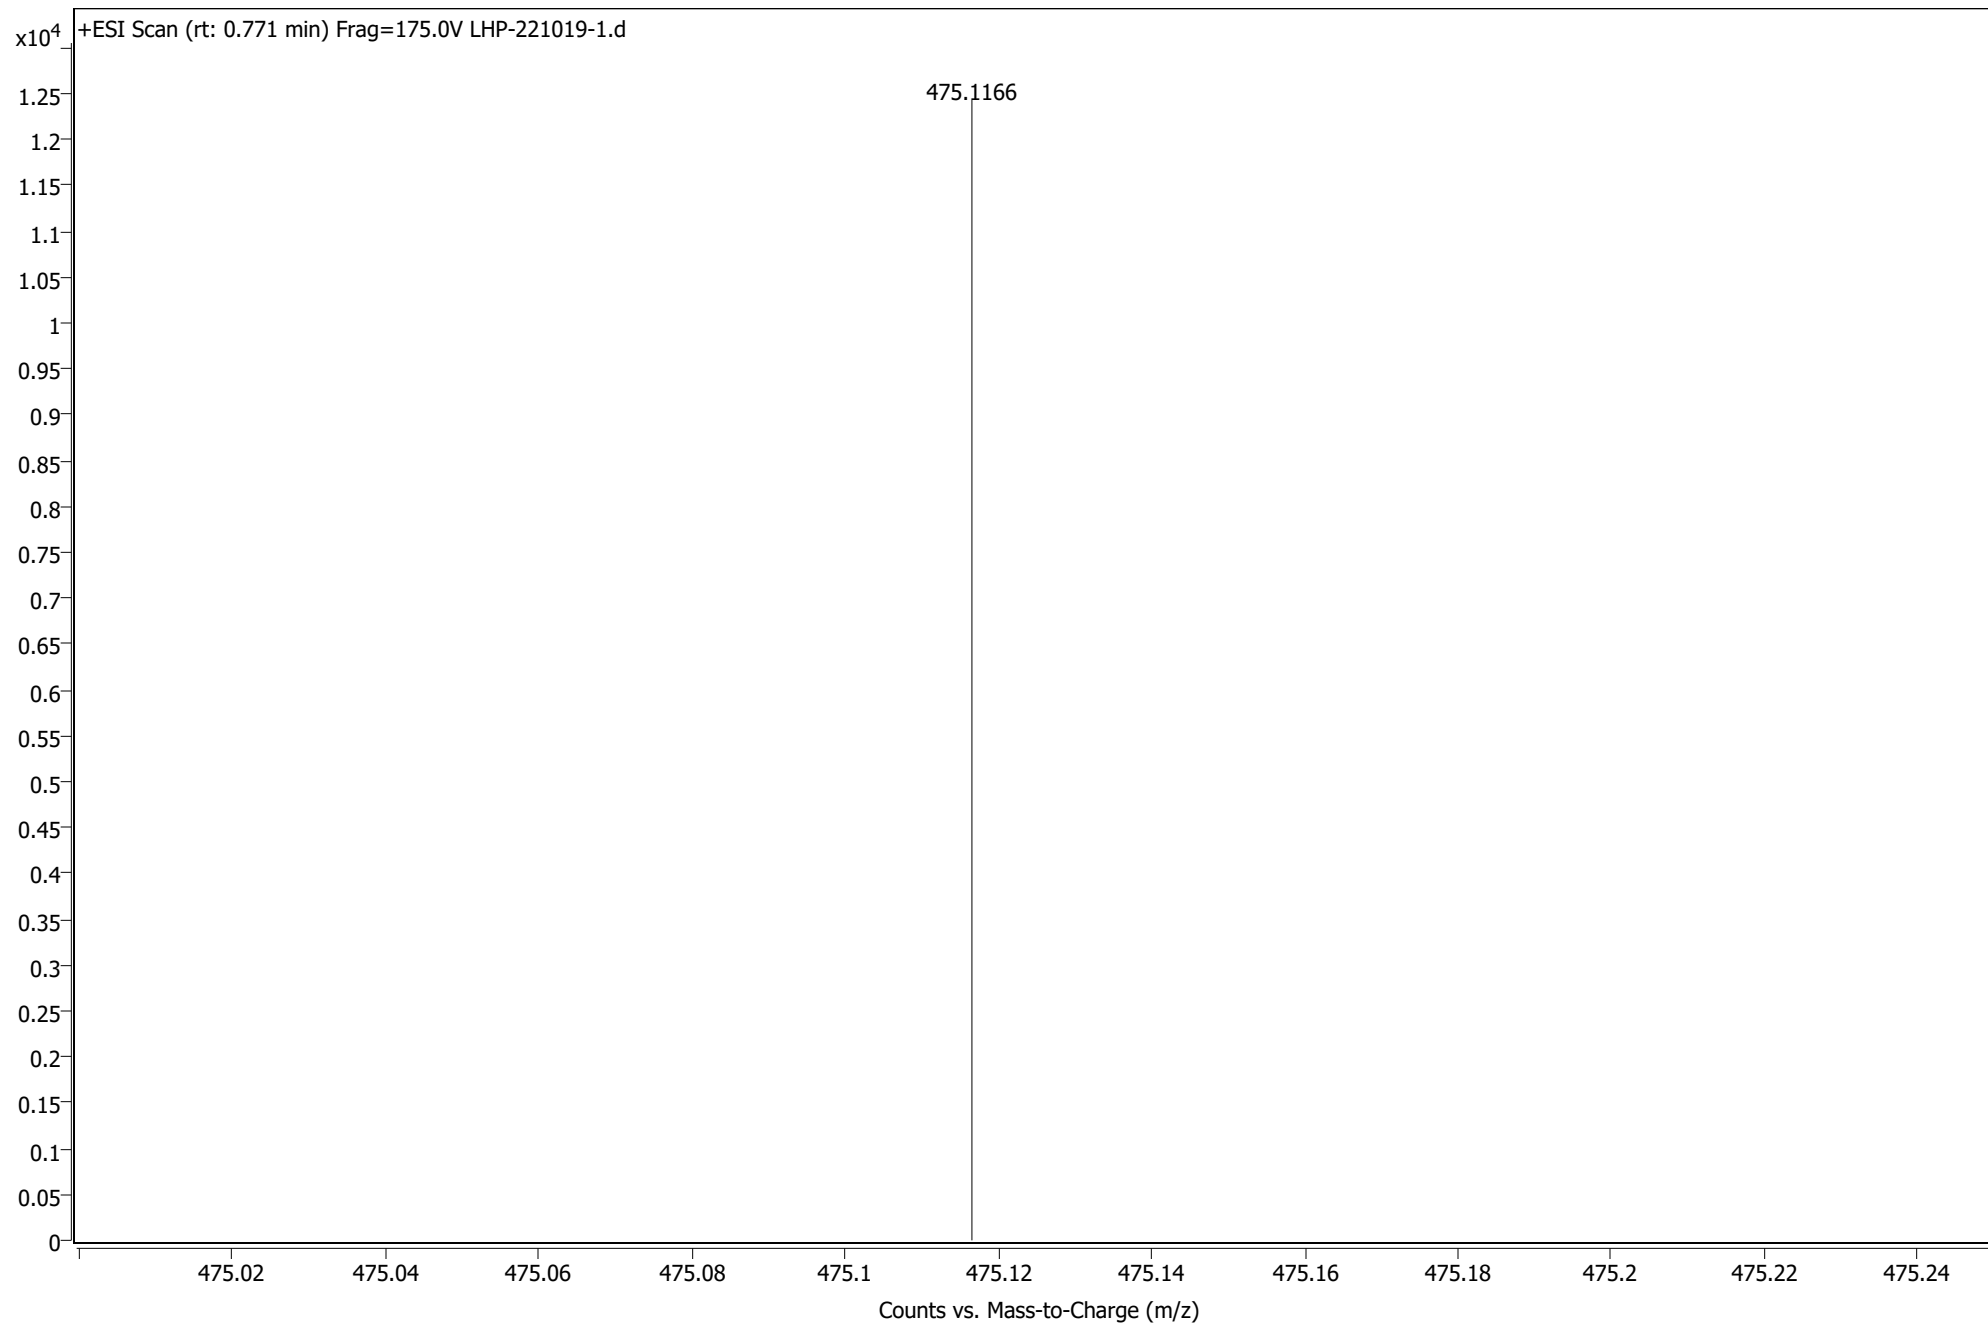

Supplement: d2cc06324g2.zip [file d2cc06324g2.zip]

# Spectrum Plot Report

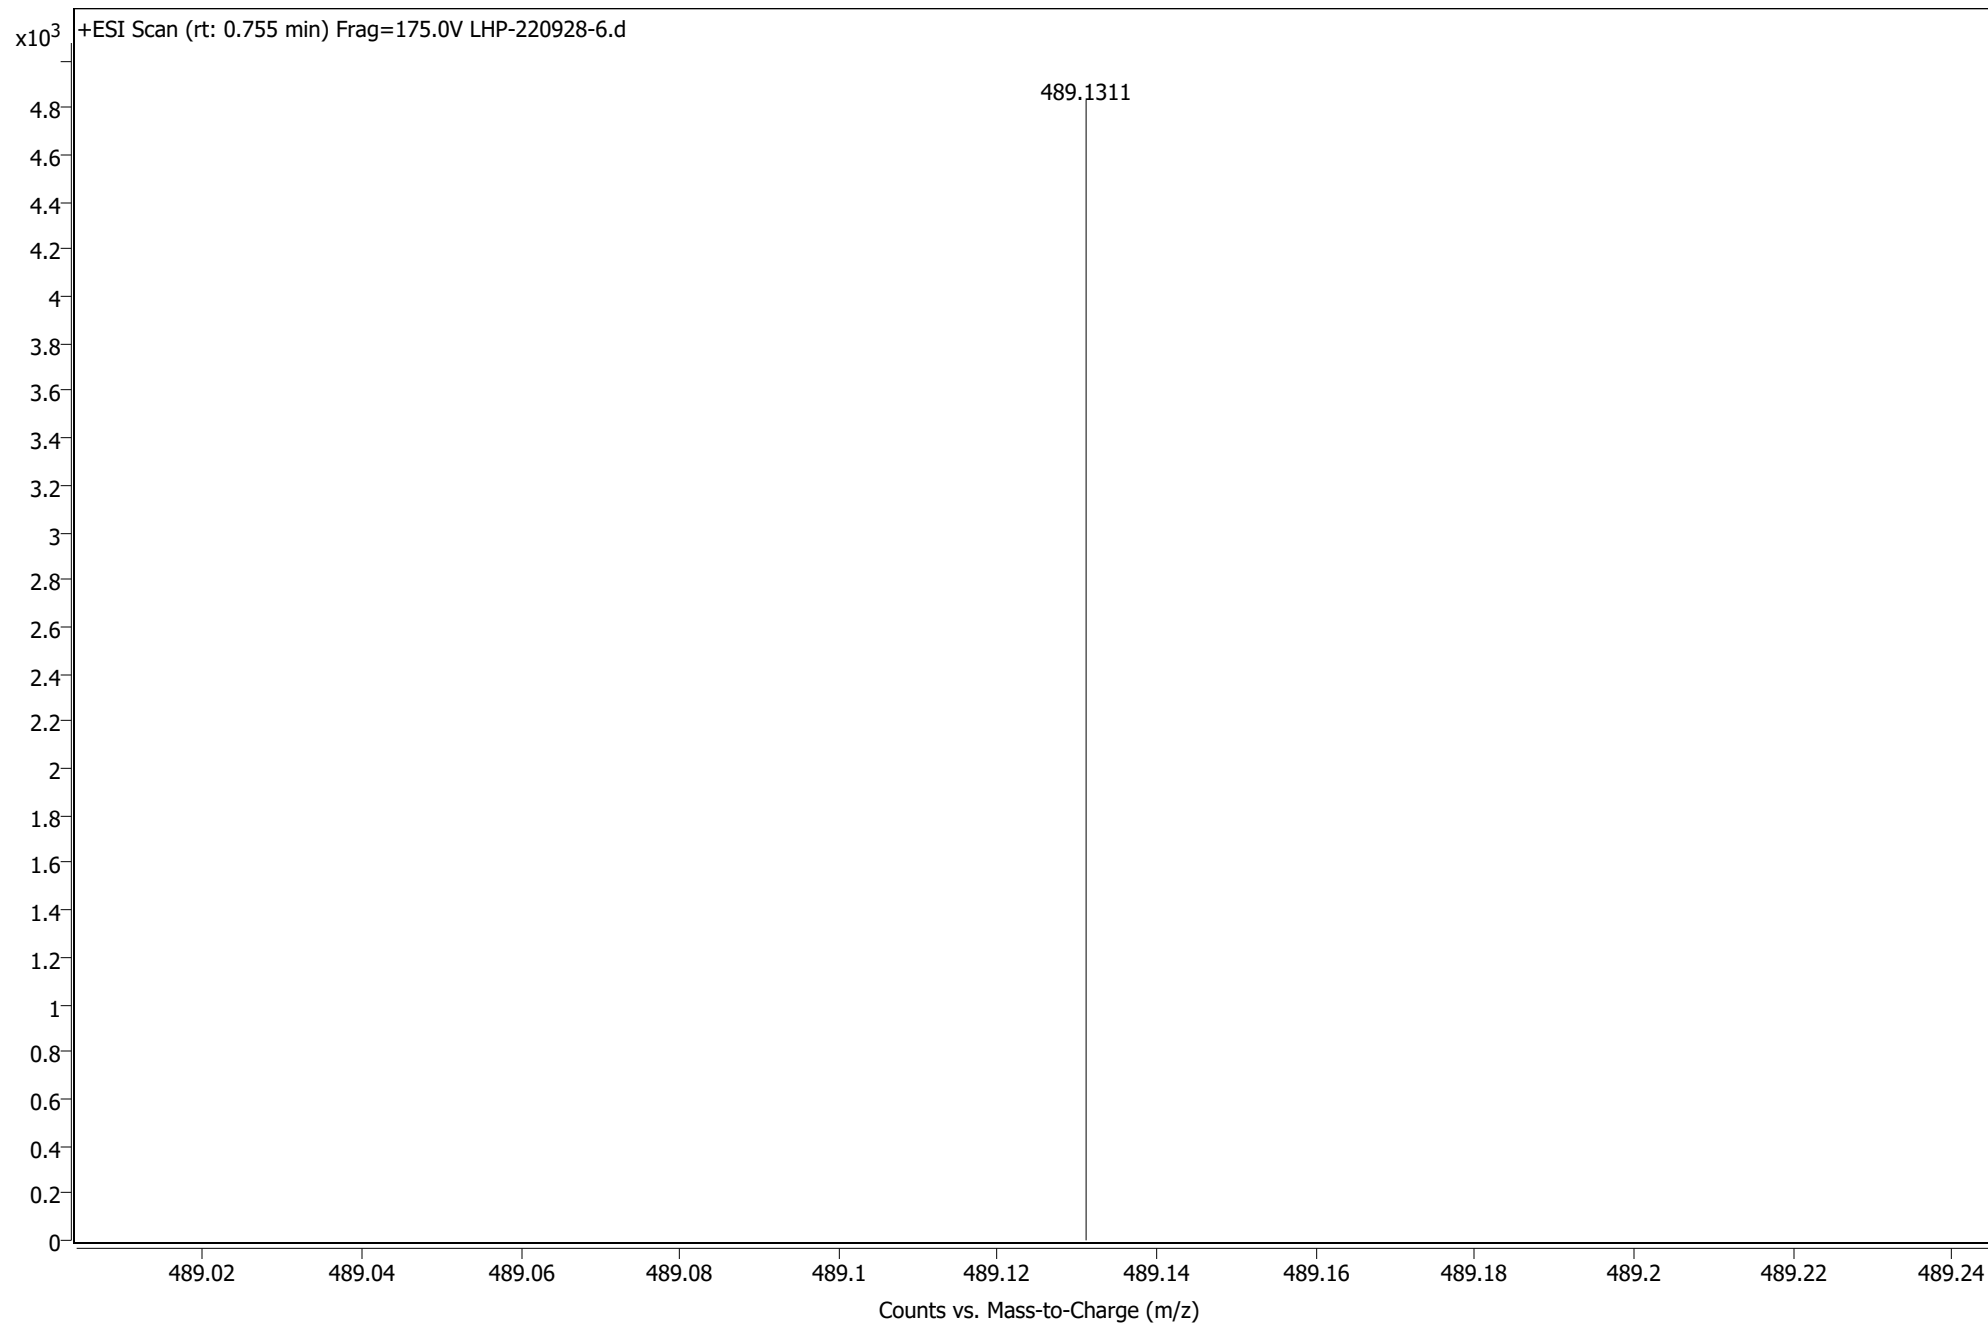

Supplement: d2cc06324g2.zip [file d2cc06324g2.zip]

# Spectrum Plot Report

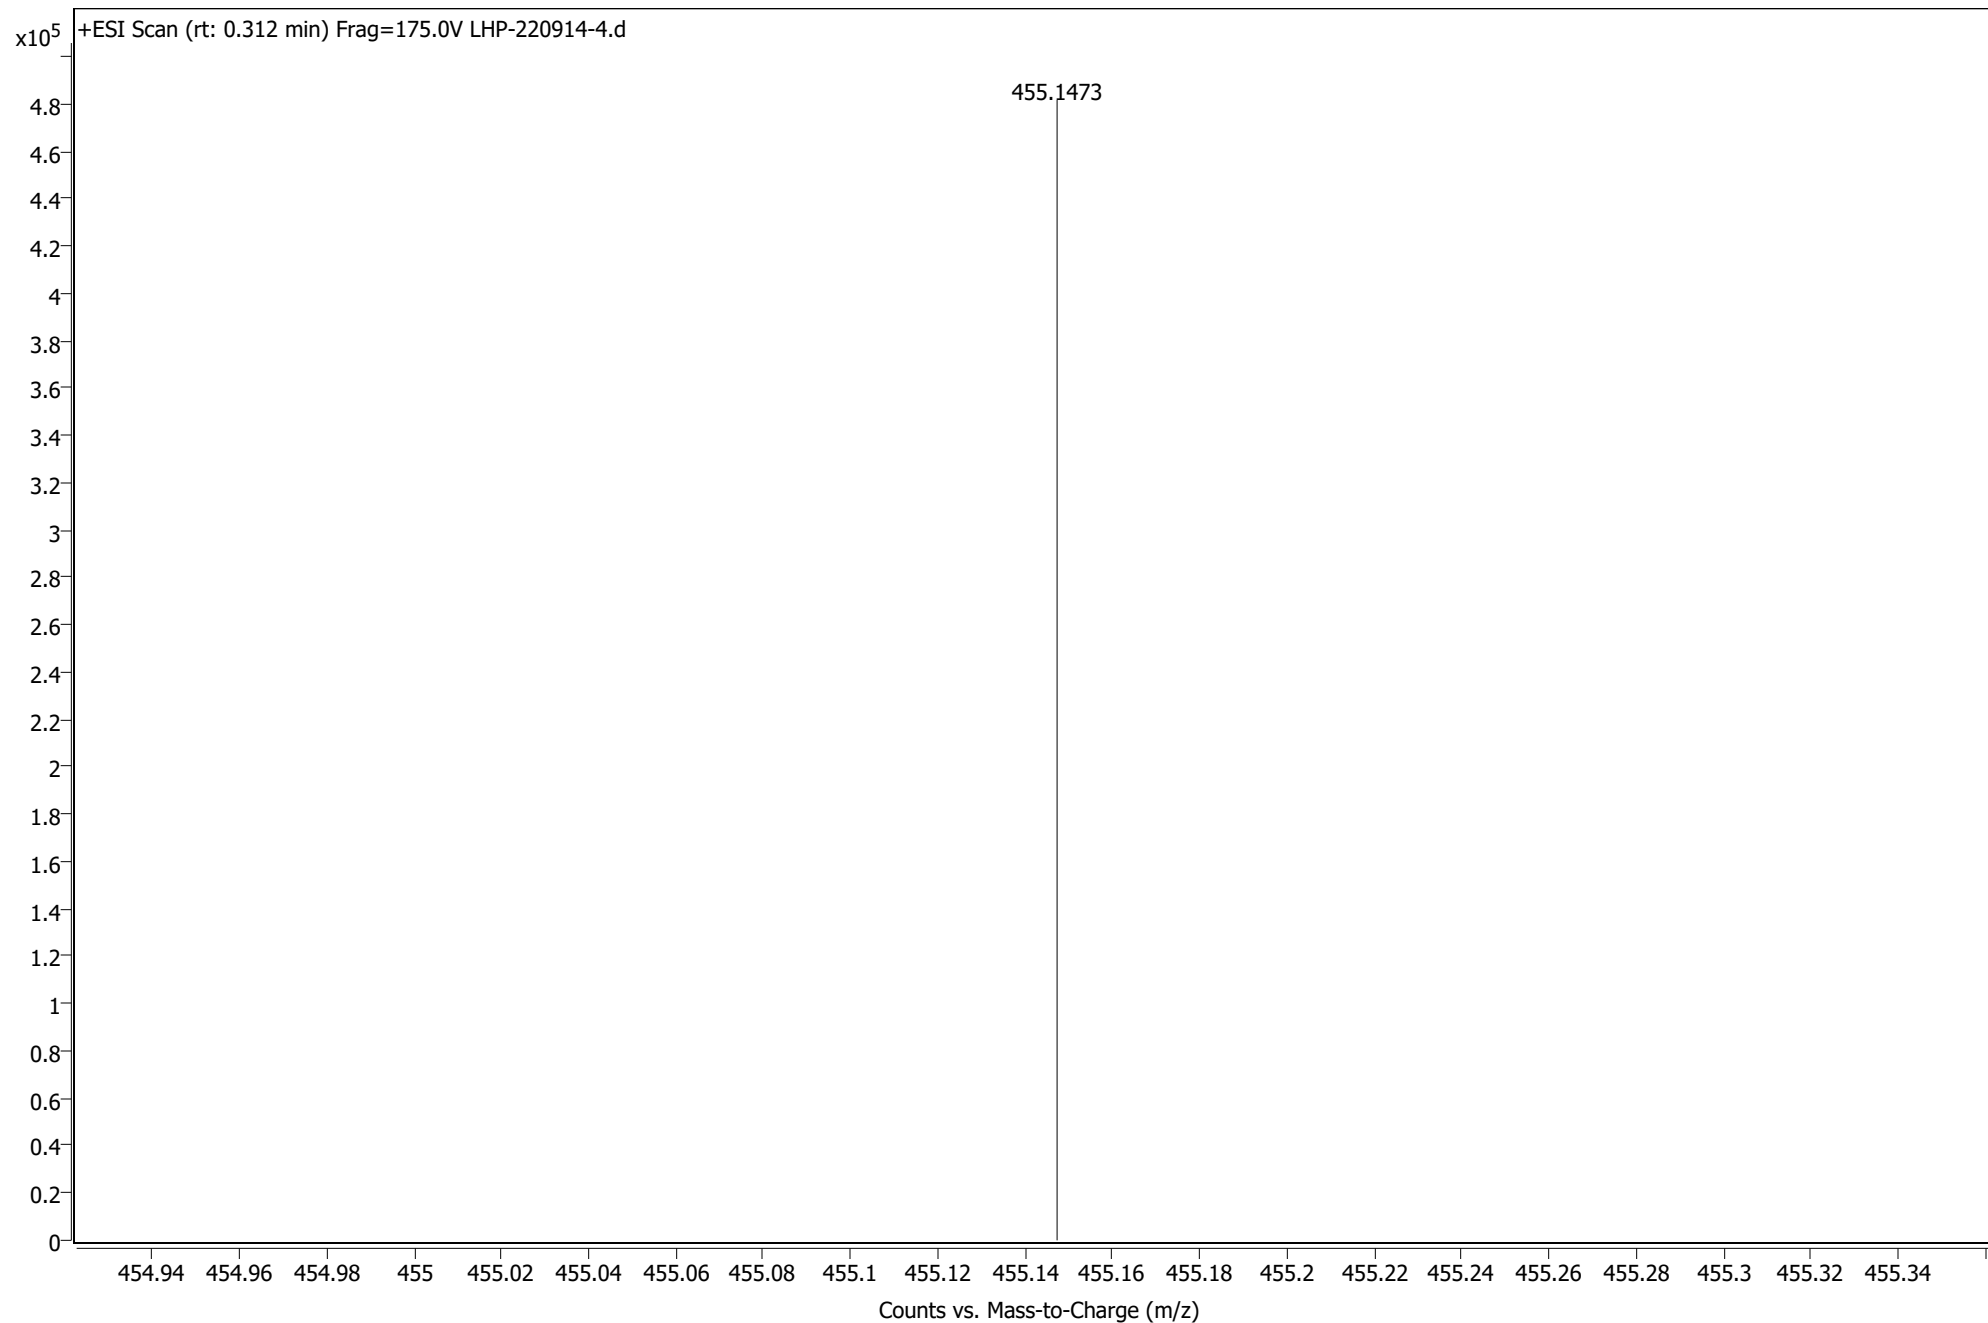

Supplement: d2cc06324g2.zip [file d2cc06324g2.zip]

# Spectrum Plot Report

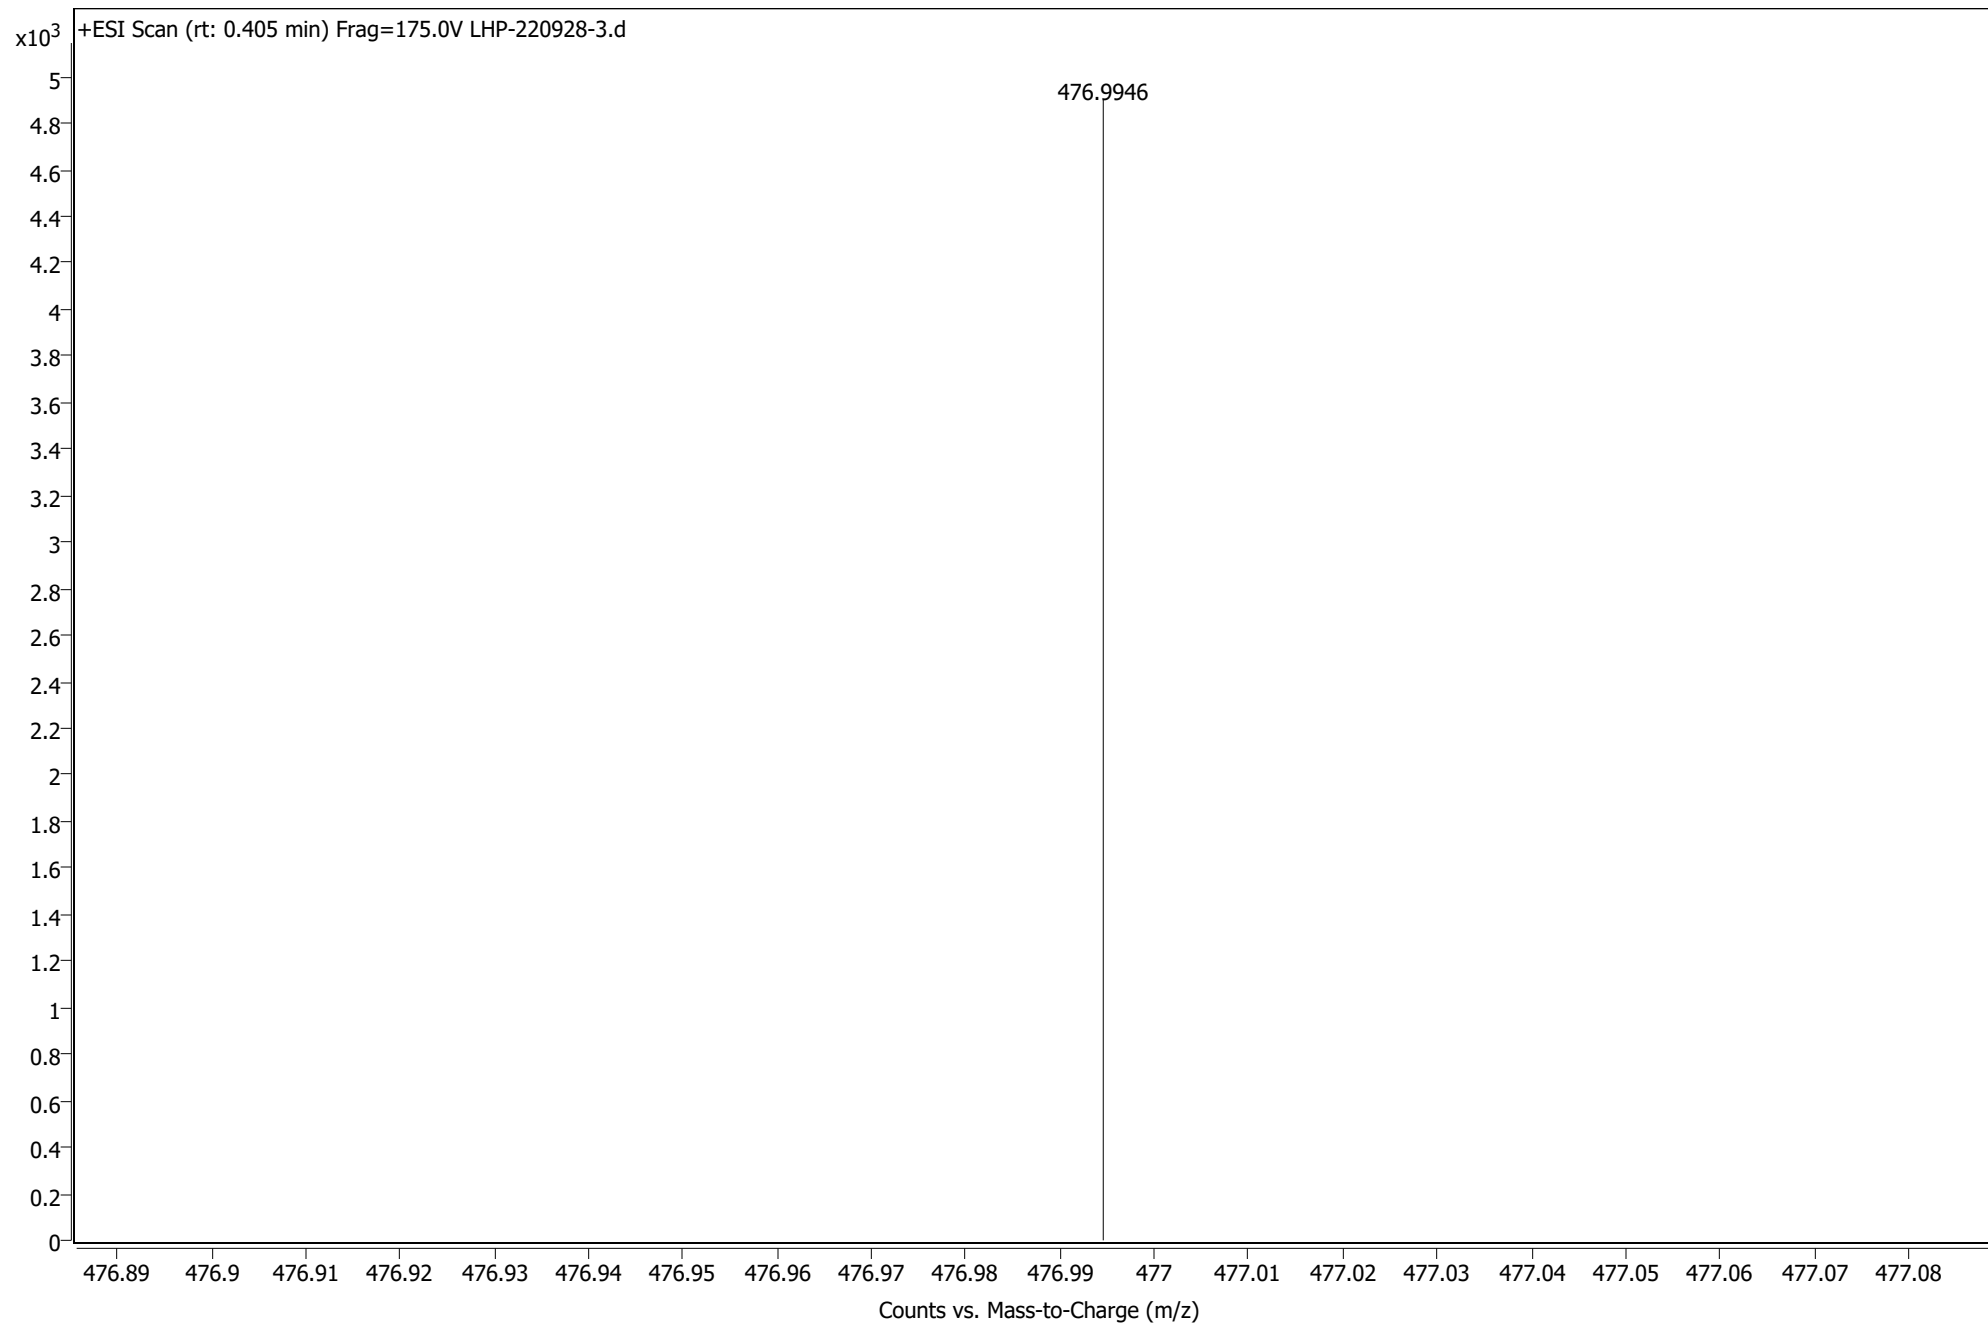

Supplement: d2cc06324g2.zip [file d2cc06324g2.zip]

# Spectrum Plot Report

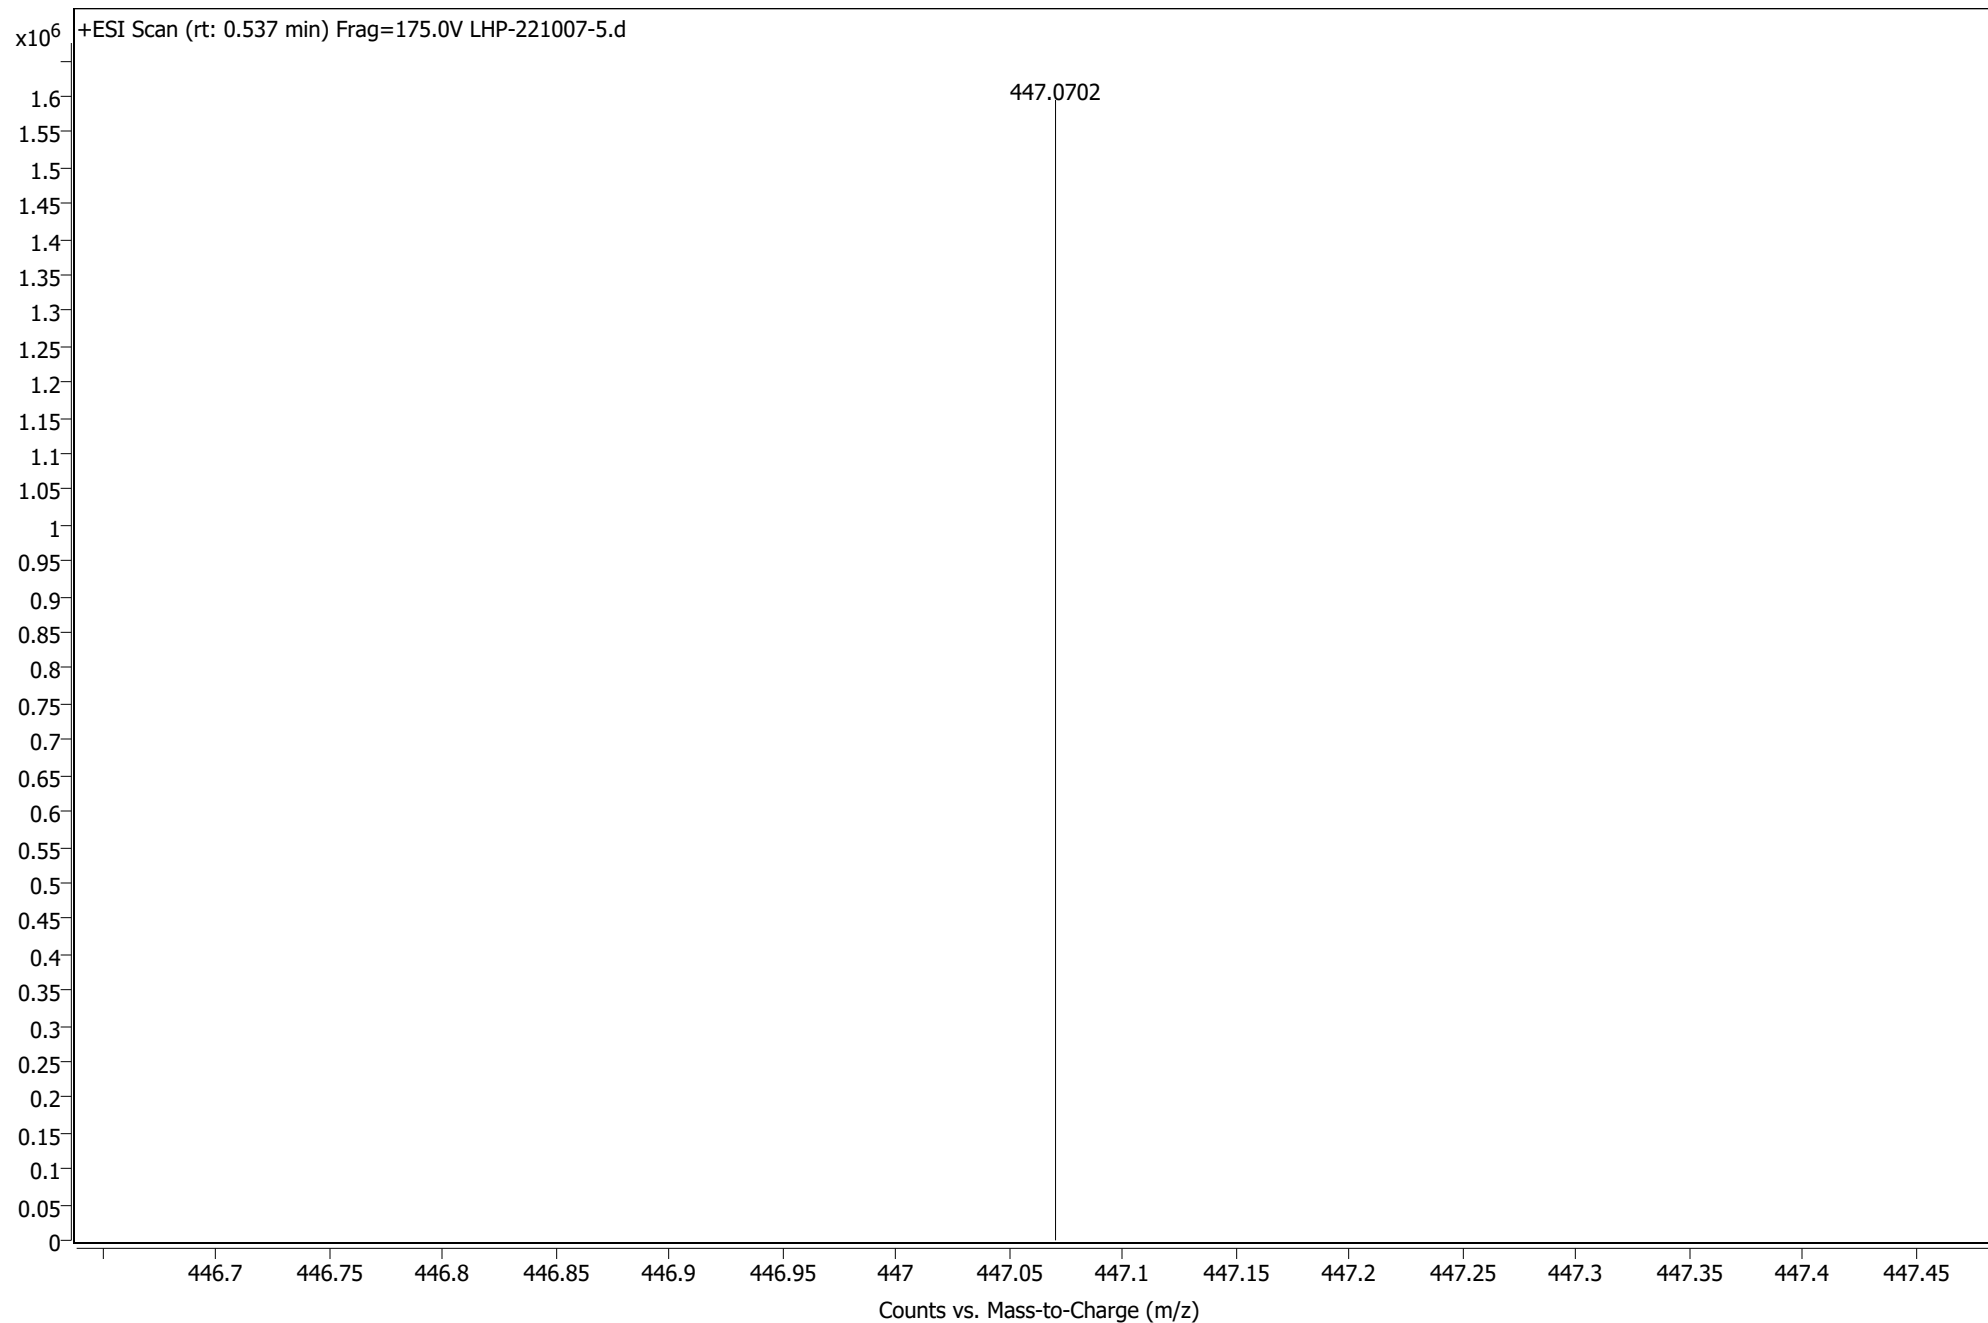

Supplement: d2cc06324g2.zip [file d2cc06324g2.zip]

# Spectrum Plot Report

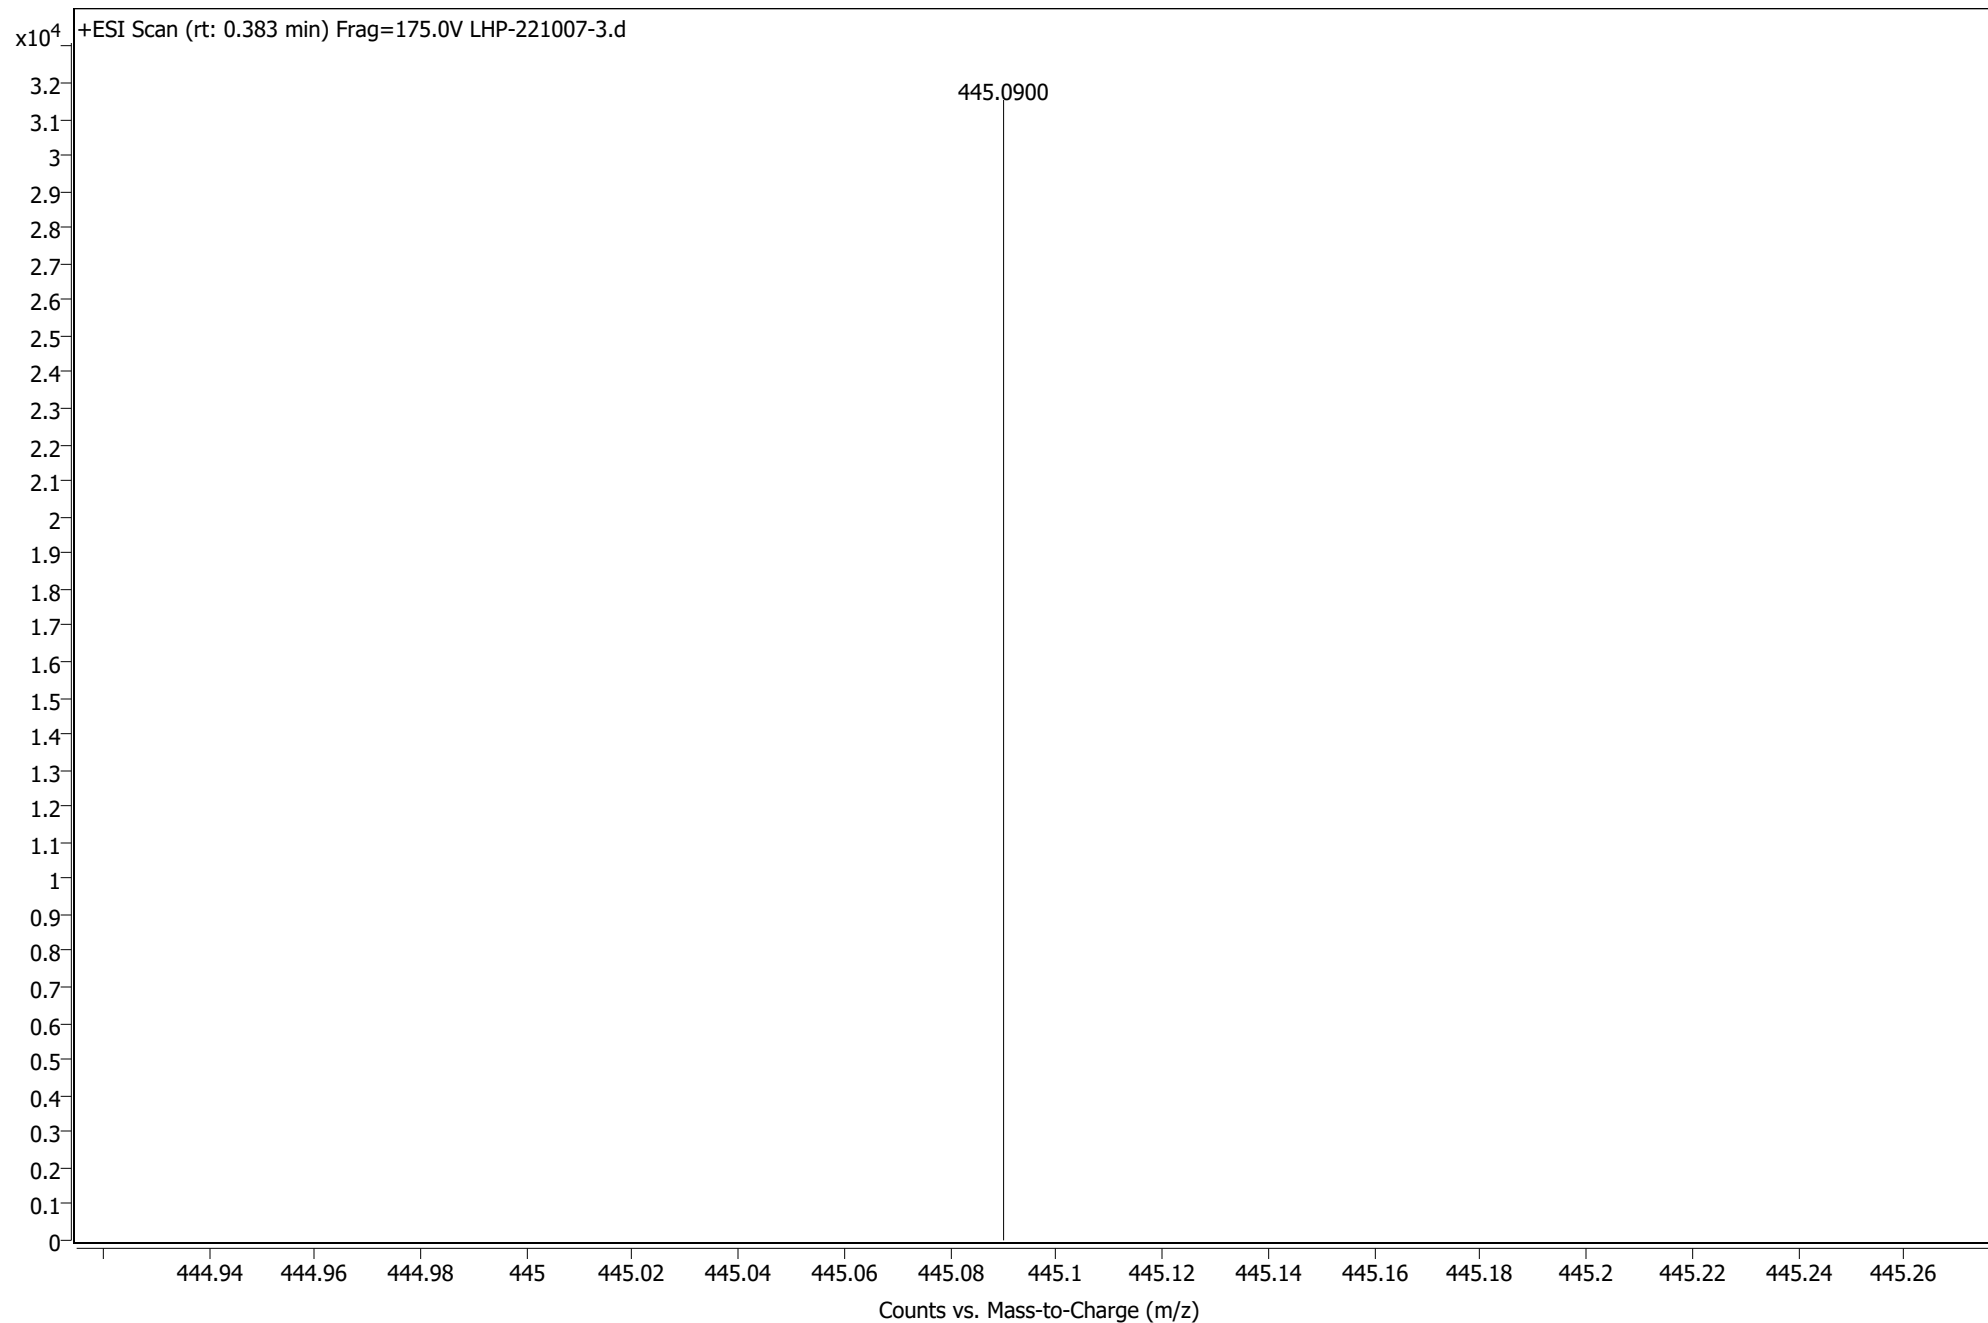

Supplement: d2cc06324g2.zip [file d2cc06324g2.zip]

# Spectrum Plot Report

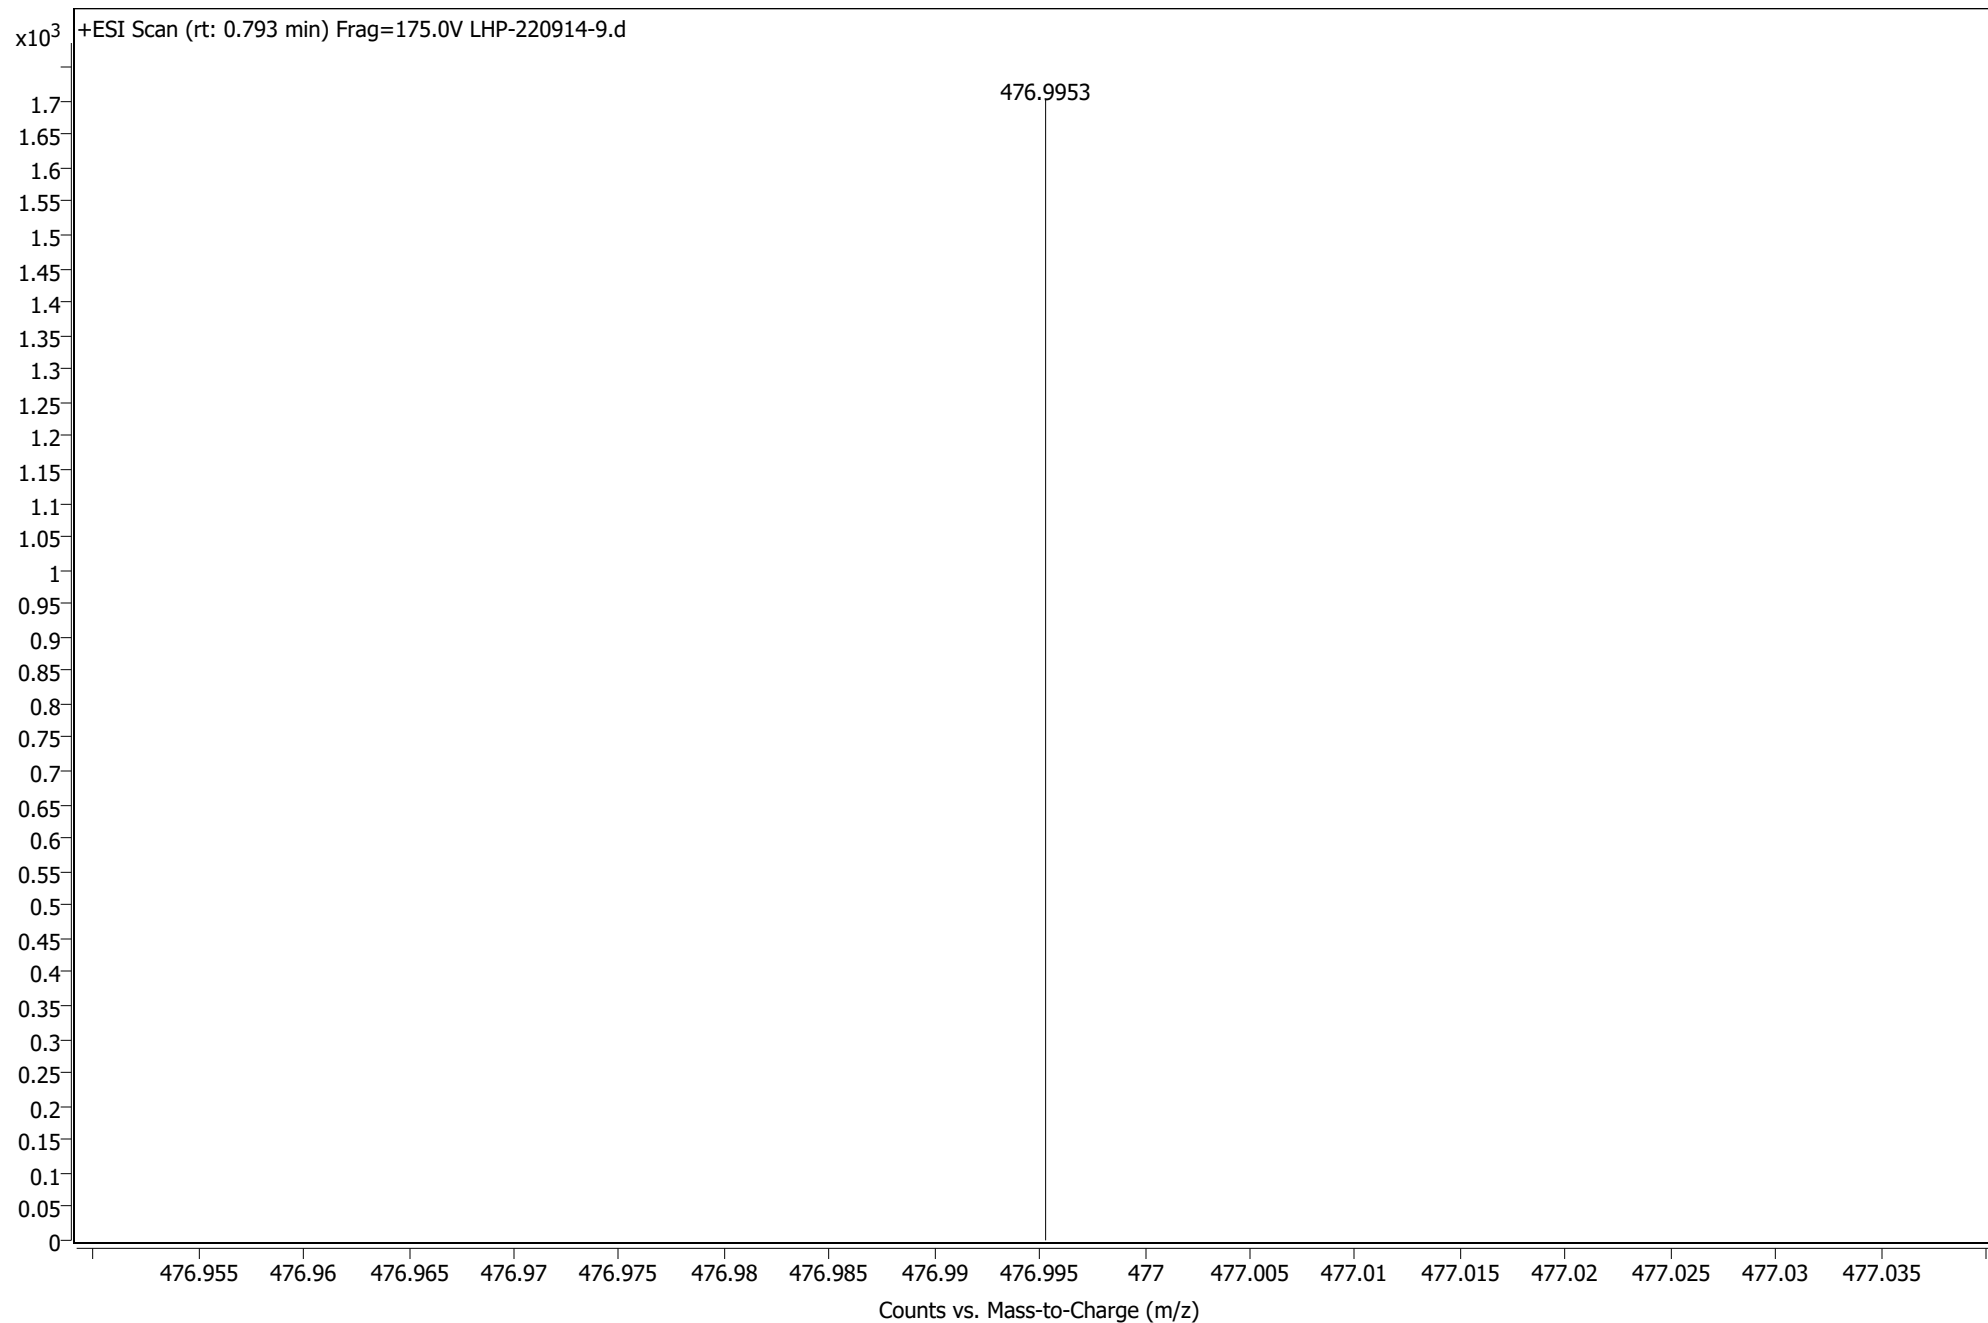

Supplement: d2cc06324g2.zip [file d2cc06324g2.zip]

# Spectrum Plot Report

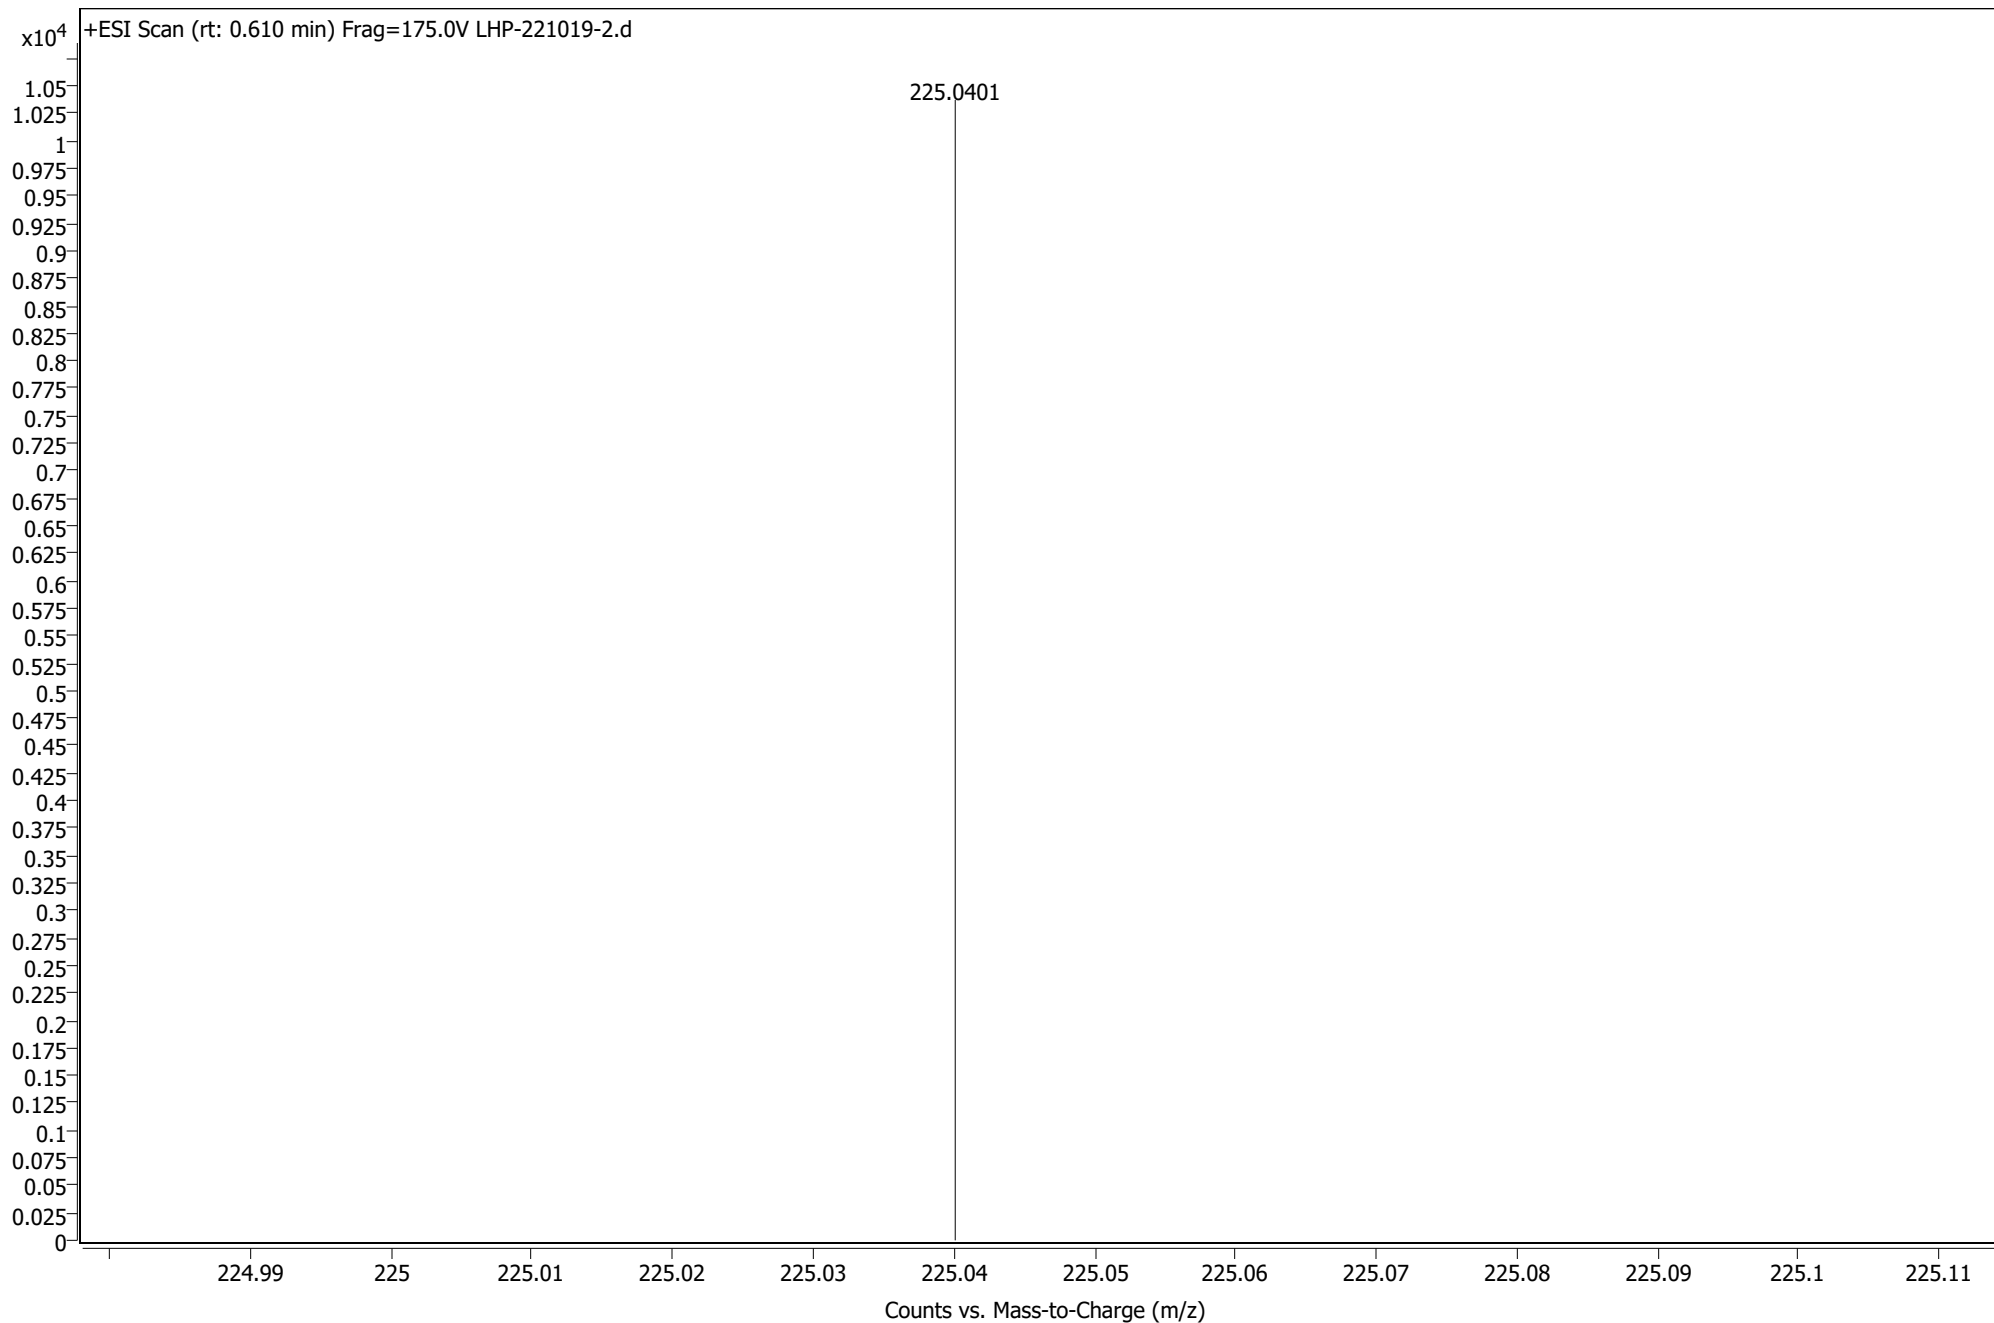

Supplement: d2cc06324g2.zip [file d2cc06324g2.zip]

# Spectrum Plot Report

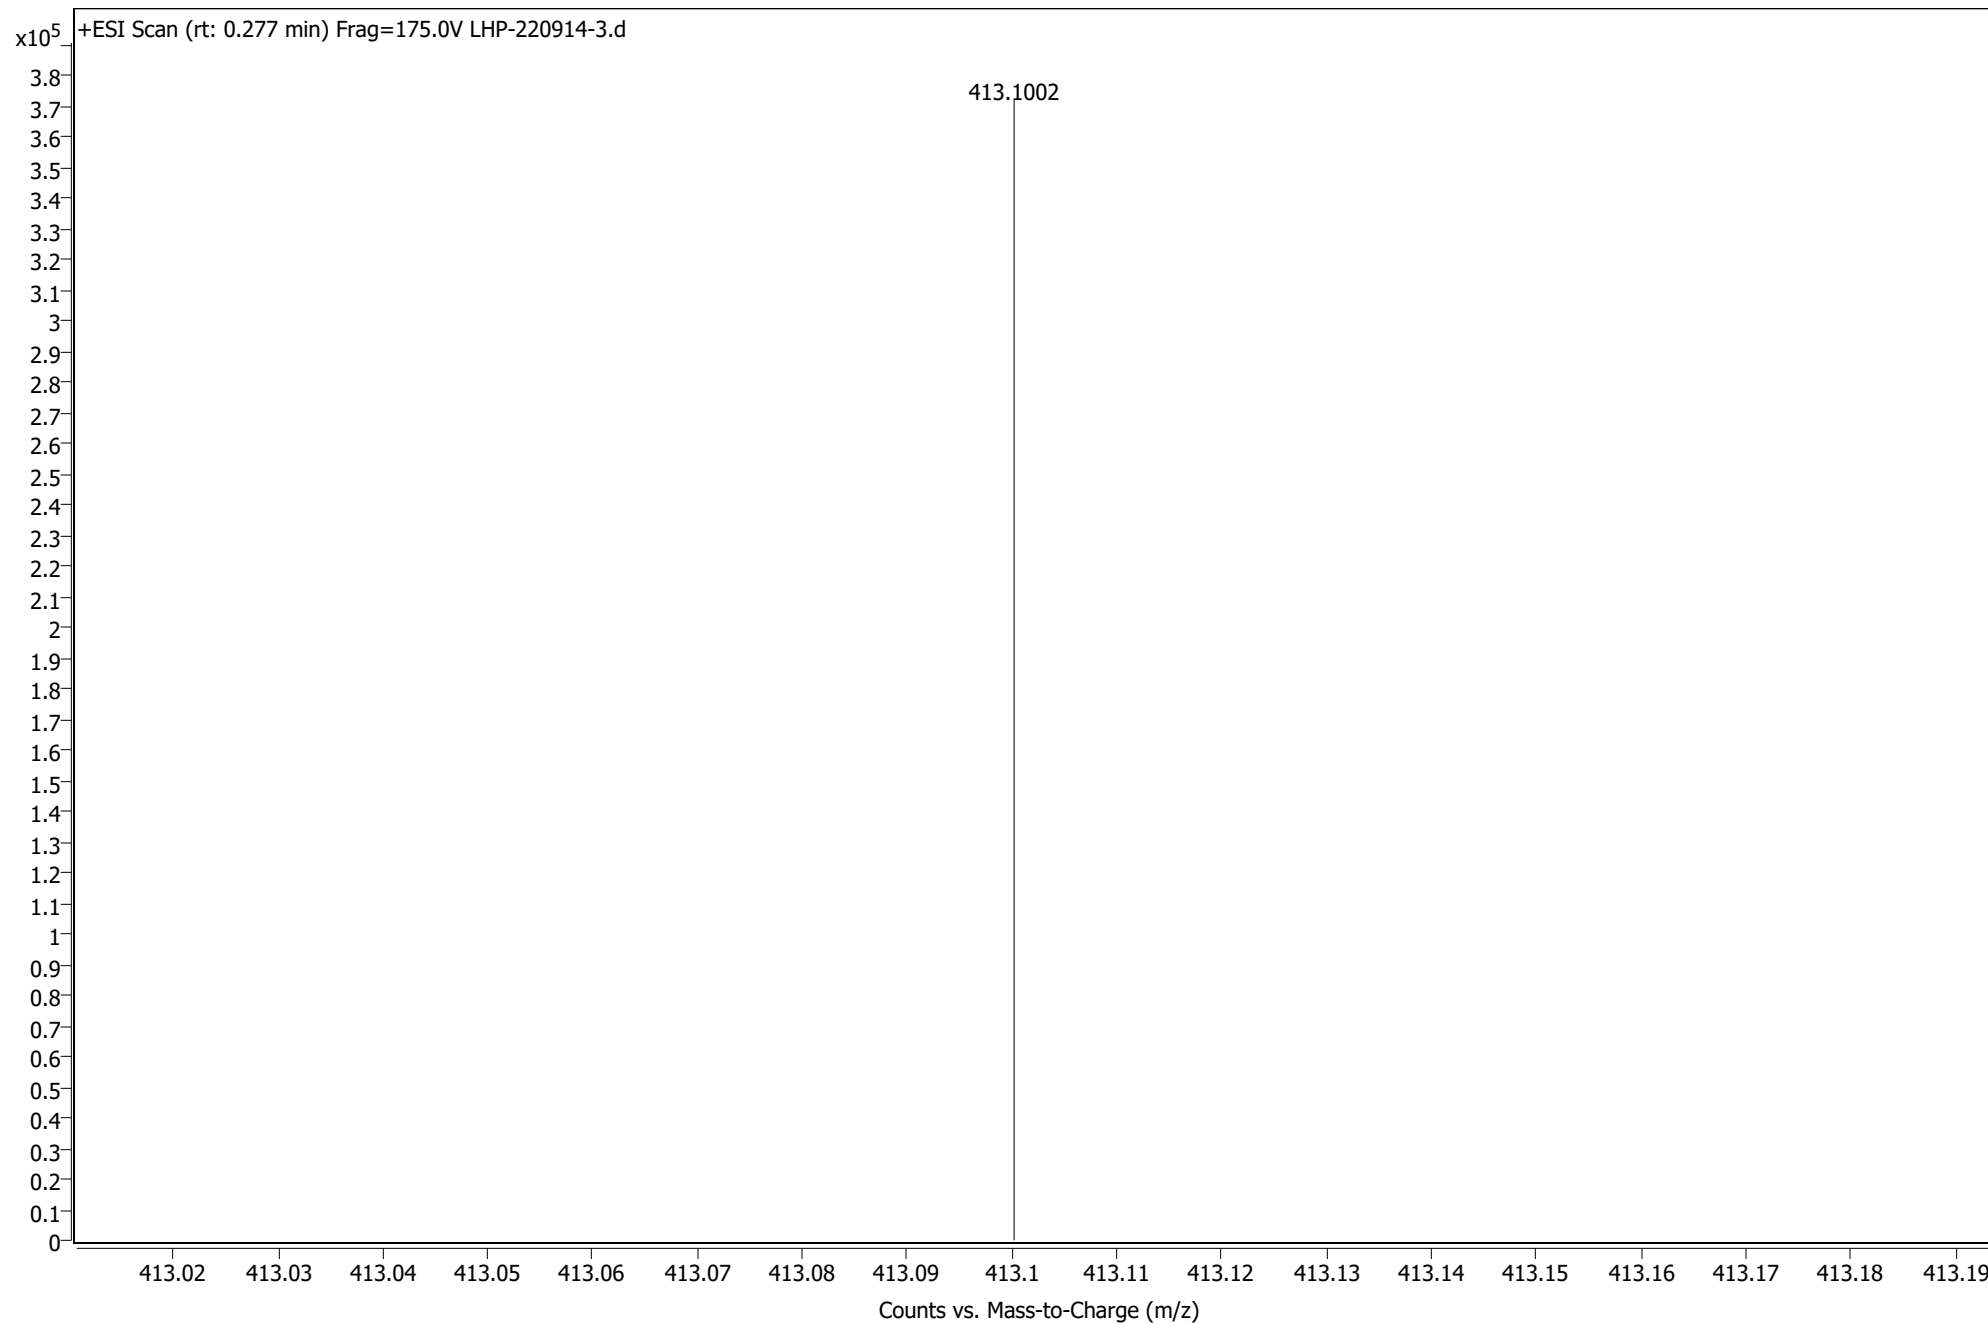

Supplement: d2cc06324g2.zip [file d2cc06324g2.zip]
